# Supplementary material for: A DFT Investigation of the Reactivity of Guanidinium Salts in Tandem aza-Michael Addition/Intramolecular Cyclization
Source: MDPI journal article supplement (doi:10.3390/molecules28052218), 2023-02-27
Supplement: s1 [file s1]

# A DFT Investigation of the Reactivity of Guanidinium Salts in Tandem aza-Michael Addition/Intramolecular Cyclization

Zoran Glasovac \*, Luka Barešić and Davor Margetić

|                                                                               |     |
|-------------------------------------------------------------------------------|-----|
| S1. Formation of the guanidine tautomers .....                                | 2   |
| S2. Mechanism of the AMA/CYC reaction .....                                   | 3   |
| S2.1. Energies of the investigated structures .....                           | 3   |
| S3. The reaction energy profiles calculated for <b>1a</b> and <b>1c</b> ..... | 9   |
| S4. The Entropy correction approach .....                                     | 10  |
| S5. Comparison of selected density functionals .....                          | 12  |
| S6. The methanol elimination catalyzed with guanidine .....                   | 14  |
| S7. Cartesian coordinates .....                                               | 15  |
| S7.1. G3 Optimized geometries .....                                           | 15  |
| S7.2. B3LYP Optimized geometries (from <b>1a</b> tautomers) .....             | 21  |
| S7.3. B3LYP Optimized geometries (from <b>1b</b> tautomers) .....             | 52  |
| S7.4. B3LYP Optimized geometries (from <b>1c</b> tautomers) .....             | 84  |
| S8. References .....                                                          | 122 |

## S1. Formation of the guanidine tautomers

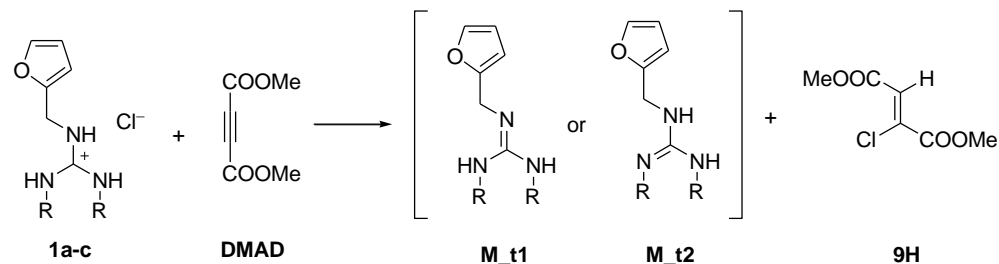

**Scheme S1.** Reaction Scheme for the formation of 2-chlorofumarate (**9H**) by chloride addition to **DMAD** with concomitant deprotonation of the guanidine.

**Table S1.** Calculated electronic energies ( $E_{\text{scf}}$ ), corrections to the Gibbs energies ( $G_{\text{corr}}$ ) and Gibbs energies ( $G_{\text{tot}}$ ) of the relevant structures associated with the reaction given in Scheme S1, and calculated using B3LYP, M06-2X and G3 approaches.<sup>1,2</sup>

| Structure              | $E_{\text{scf}}(\text{B3LYP})$ | $G_{\text{corr}}$ | $G_{\text{tot}}(\text{B3LYP})$ | $E_{\text{scf}}(\text{M06})$ | $G_{\text{tot}}(\text{M06})$ | $G_{\text{tot}}(\text{G3})$ |
|------------------------|--------------------------------|-------------------|--------------------------------|------------------------------|------------------------------|-----------------------------|
| <b>1a_t1</b>           | -551.12745                     | 0.15260           | -550.97485                     | -550.91208                   | -550.75948                   | -550.58275                  |
| <b>1a_t2</b>           | -551.12689                     | 0.15210           | -550.97479                     | -550.91027                   | -550.75817                   | -550.58246                  |
| <b>1aH<sup>+</sup></b> | -551.60587                     | 0.16645           | -551.43943                     | -551.38441                   | -551.21796                   | -551.04515                  |
| <b>1b_t1</b>           | -590.45549                     | 0.18059           | -590.27490                     | -590.22084                   | -590.04025                   | -589.85684                  |
| <b>1b_t2</b>           | -590.45523                     | 0.18021           | -590.27501                     | -590.22058                   | -590.04037                   | -589.85762                  |
| <b>1bH<sup>+</sup></b> | -590.93913                     | 0.19332           | -590.74581                     | -590.69966                   | -590.50635                   | -590.32688                  |
| <b>1c_t1</b>           | -709.64338                     | 0.27518           | -709.36820                     | -709.34168                   | -709.06650                   |                             |
| <b>1c_t2</b>           | -709.64199                     | 0.27572           | -709.36627                     | -709.33991                   | -709.06420                   |                             |
| <b>1cH<sup>+</sup></b> | -710.12810                     | 0.29144           | -709.83666                     | -709.82090                   | -709.52947                   | -709.34213                  |
| <b>DMAD</b>            | -533.28148                     | 0.07614           | -533.20534                     | -533.07424                   | -532.99809                   | -532.80517                  |
| <b>Cl<sup>-</sup></b>  | -460.40868                     | -0.01502          | -460.42370                     | -460.37370                   | -460.38872                   | -460.24342                  |
| <b>9H</b>              | -994.16659                     | 0.08874           | -994.07785                     | -993.93546                   | -993.84672                   | -993.50921                  |

<sup>1</sup> B3LYP = B3LYP(SMD,ACN)/6-311+G(2df,p)//B3LYP(SMD,ACN)/6-31G(d,p); M06 = M06-2X(SMD,ACN)/6-311++G(3df,2pd) //B3LYP(SMD,ACN)/6-31G(d,p), G3 = G3(SMD,ACN). <sup>2</sup> Energies,  $G_{\text{corr}}$ , and  $G_{\text{tot}}$  were given in a.u.  $\Delta G_{\text{rel}}$  is given in kJ mol<sup>-1</sup>.

## S2. Mechanism of the AMA/CYC reaction

### S2.1. Energies of the investigated structures

**Table S2.** Calculated electronic energies ( $E_{\text{scf}}$ ), corrections to the Gibbs energies ( $G_{\text{corr}}$ ) and Gibbs energies ( $G_{\text{tot}}$ ) of the relevant structures associated with the reaction pathway starting from the guanidine tautomers. <sup>1,2</sup>

| Structure                 | $E_{\text{scf}}(\text{B3LYP})$ | $G_{\text{corr}}$ | $G_{\text{tot}}(\text{B3LYP})$ | $E_{\text{scf}}(\text{M06})$ | $G_{\text{tot}}(\text{M06})$ | $\Delta G_{\text{rel}}(\text{M06})^3$ |
|---------------------------|--------------------------------|-------------------|--------------------------------|------------------------------|------------------------------|---------------------------------------|
| NCov(1a_t1)               | -1084.40848                    | 0.24775           | -1084.16073                    | -1083.99151                  | -1083.74376                  | 36                                    |
| TS1(1a_t1)                | -1084.38631                    | 0.25053           | -1084.13579                    | -1083.97220                  | -1083.72167                  | 94                                    |
| 10a_t1                    | -1084.41656                    | 0.25665           | -1084.15991                    | -1084.01191                  | -1083.75526                  | 6                                     |
| TS2(1a_t1)                | -1084.40525                    | 0.25479           | -1084.15046                    | -1083.99846                  | -1083.74368                  | 37                                    |
| 11a_t1                    | -1084.41634                    | 0.25566           | -1084.16068                    | -1084.01218                  | -1083.75653                  | 3                                     |
| TS3(1a_t1)                | -1084.40990                    | 0.25254           | -1084.15737                    | -1084.00555                  | -1083.75301                  | 12                                    |
| E-12a_t1                  | -1084.40990                    | 0.25254           | -1084.15737                    | -1084.04325                  | -1083.78741                  | -78                                   |
| Z-12a_t1                  | -1084.44936                    | 0.25627           | -1084.19309                    | -1084.04568                  | -1083.78941                  | -84                                   |
| TS4 <sub>sc</sub> (1a_t1) | -1084.42578                    | 0.25757           | -1084.16821                    | -1084.02251                  | -1083.76494                  | -19                                   |
| TS4 <sub>6c</sub> (1a_t1) | -1084.42677                    | 0.25880           | -1084.16797                    | -1084.02770                  | -1083.76891                  | -30                                   |
| 13a_t1                    | -1084.42740                    | 0.25809           | -1084.16930                    | -1084.02493                  | -1083.76684                  | -24                                   |
| E-13a_t1                  | <b>ring opening</b>            |                   |                                |                              |                              |                                       |
| 14a_t1                    | -1084.42868                    | 0.25873           | -1084.16995                    | -1084.02966                  | -1083.77093                  | -35                                   |
| 15a_t1                    | -1084.43388                    | 0.25938           | -1084.17451                    | -1084.03921                  | -1083.77984                  | -58                                   |
| E-15a_t1                  | -1084.44658                    | 0.25992           | -1084.18666                    | -1084.05125                  | -1083.79132                  | -89                                   |
| 16a_t1                    | -1084.43354                    | 0.25887           | -1084.17467                    | -1084.04170                  | -1083.78283                  | -66                                   |
| 17a_t1                    | -1084.46626                    | 0.25297           | -1084.21329                    | -1084.05335                  | -1083.80038                  | -112                                  |
| E-17a_t1                  | -1084.46297                    | 0.25118           | -1084.21179                    | -1084.04959                  | -1083.79841                  | -107                                  |
| 18a_t1                    | -1084.47207                    | 0.25364           | -1084.21843                    | -1084.06322                  | -1083.80957                  | -137                                  |

<sup>1</sup> B3LYP = B3LYP(SMD,ACN)/6-311+G(2df,p)//B3LYP(SMD,ACN)/6-31G(d,p); M06 = M06-2X(SMD,ACN)/6-311++G(3df,2pd) //B3LYP(SMD,ACN)/6-31G(d,p). <sup>2</sup>  $E_{\text{scf}}$ ,  $G_{\text{corr}}$ , and  $G_{\text{tot}}$  are given in a.u.  $\Delta G_{\text{rel}}$  is given in kJ mol<sup>-1</sup>.

$\Delta G_{\text{rel}}$  is calculated using the equation:  $\Delta G_{\text{rel}}(\text{Structure}) = G_{\text{tot}}(\text{Structure}) - [G_{\text{tot}}(\mathbf{1a\_t1}) + G_{\text{tot}}(\mathbf{DMAD})]$

Table S2. (contd.)

| Structure                 | $E_{\text{scf}}(\text{B3LYP})$ | $G_{\text{corr}}$ | $G_{\text{tot}}(\text{B3LYP})$ | $E_{\text{scf}}(\text{M06})$ | $G_{\text{tot}}(\text{M06})$ | $\Delta G_{\text{rel}}(\text{M06})^3$ |
|---------------------------|--------------------------------|-------------------|--------------------------------|------------------------------|------------------------------|---------------------------------------|
| NCov(1a_t2)               | -1084.40601                    | 0.24675           | -1084.15926                    | -1083.98737                  | -1083.74062                  | 45                                    |
| TS1(1a_t2)                | -1084.38402                    | 0.25012           | -1084.13390                    | -1083.96966                  | -1083.71955                  | 100                                   |
| 10a_t2                    | -1084.41974                    | 0.25629           | -1084.16345                    | -1084.01203                  | -1083.75574                  | 5                                     |
| TS2(1a_t2)                | -1084.40853                    | 0.25447           | -1084.15406                    | -1083.99898                  | -1083.74451                  | 34                                    |
| 11a_t2                    | -1084.42096                    | 0.25466           | -1084.16630                    | -1084.01342                  | -1083.75875                  | -3                                    |
| TS3(1a_t2)                | -1084.41893                    | 0.25176           | -1084.16717                    | -1084.01161                  | -1083.75985                  | (-6) <sup>4</sup>                     |
| E-12a_t2                  | -1084.45764                    | 0.25665           | -1084.20098                    | -1084.05259                  | -1083.79594                  | -101                                  |
| Z-12a_t2                  | -1084.45806                    | 0.25661           | -1084.20145                    | -1084.05182                  | -1083.79521                  | -99                                   |
| TS4 <sub>5c</sub> (1a_t2) | -1084.43855                    | 0.25541           | -1084.18315                    | -1084.03328                  | -1083.77787                  | -53                                   |
| TS4 <sub>6c</sub> (1a_t2) | -1084.43208                    | 0.25710           | -1084.17499                    | -1084.03107                  | -1083.77397                  | -43                                   |
| 13a_t2                    | -1084.43922                    | 0.25533           | -1084.18390                    | -1084.03498                  | -1083.77966                  | -58                                   |
| E-13a_t2                  | <b>ring opening</b>            |                   |                                |                              |                              |                                       |
| 14a_t2                    | -1084.43295                    | 0.25761           | -1084.17534                    | -1084.03205                  | -1083.77446                  | -44                                   |
| 15a_t2                    | -1084.44078                    | 0.25714           | -1084.18365                    | -1084.04478                  | -1083.78798                  | -80                                   |
| E-15a_t2                  | -1084.44833                    | 0.25878           | -1084.18955                    | -1084.05165                  | -1083.79287                  | -93                                   |
| 16a_t2                    | -1084.43437                    | 0.25751           | -1084.17686                    | -1084.04121                  | -1083.78370                  | -69                                   |
| 17a_t2                    | -1084.47084                    | 0.25192           | -1084.21892                    | -1084.05733                  | -1083.80541                  | -126                                  |
| E-17a_t2                  | -1084.46445                    | 0.25017           | -1084.21427                    | -1084.04948                  | -1083.79930                  | -110                                  |
| 18a_t2                    | -1084.47396                    | 0.25299           | -1084.22097                    | -1084.06412                  | -1083.81113                  | -141                                  |

<sup>1</sup> B3LYP = B3LYP(SMD,ACN)/6-311+G(2df,p)//B3LYP(SMD,ACN)/6-31G(d,p); M06 = M06-2X(SMD,ACN)/6-311++G(3df,2pd) //B3LYP(SMD,ACN)/6-31G(d,p). <sup>2</sup>  $E_{\text{scf}}$ ,  $G_{\text{corr}}$ , and  $G_{\text{tot}}$  are given in a.u.  $\Delta G_{\text{rel}}$  is given in kJ mol<sup>-1</sup>.  $\Delta G_{\text{rel}}$  is calculated using the equation:  $\Delta G_{\text{rel}}(\text{Structure}) = G_{\text{tot}}(\text{Structure}) - [G_{\text{tot}}(\mathbf{1a\_t2}) + G_{\text{tot}}(\mathbf{DMAD})]$ . <sup>4</sup> Interconversion from the fumarate to maleate anion substructure is associated with the barrierless intramolecular proton transfer from the guanidine subunit.

Table S2. (contd.)

| Structure                 | $E_{\text{scf}}(\text{B3LYP})$ | $G_{\text{corr}}$ | $G_{\text{tot}}(\text{B3LYP})$ | $E_{\text{scf}}(\text{M06})$ | $G_{\text{tot}}(\text{M06})$ | $\Delta G_{\text{rel}}(\text{M06})^3$ |
|---------------------------|--------------------------------|-------------------|--------------------------------|------------------------------|------------------------------|---------------------------------------|
| NCov(1b_t1)               | -1123.73579                    | 0.27347           | -1123.46232                    | -1123.30238                  | -1123.02974                  | 23                                    |
| TS1(1b_t1)                | -1123.71342                    | 0.27838           | -1123.43504                    | -1123.28164                  | -1123.00326                  | 92                                    |
| 10b_t1                    | -1123.74695                    | 0.28566           | -1123.46129                    | -1123.32499                  | -1123.03933                  | -3                                    |
| TS2(1b_t1)                | -1123.73506                    | 0.28263           | -1123.45243                    | -1123.31061                  | -1123.02798                  | 27                                    |
| 11b_t1                    | -1123.74643                    | 0.28375           | -1123.46268                    | -1123.32406                  | -1123.04031                  | -5                                    |
| TS3(1b_t1)                | -1123.74007                    | 0.27989           | -1123.46019                    | -1123.31735                  | -1123.03746                  | 2                                     |
| E-12b_t1                  | -1123.77562                    | 0.28086           | -1123.49476                    | -1123.35280                  | -1123.07194                  | -88                                   |
| Z-12b_t1                  | -1123.78028                    | 0.28468           | -1123.49560                    | -1123.35847                  | -1123.07379                  | -93                                   |
| TS4 <sub>5c</sub> (1b_t1) | -1123.76549                    | 0.28474           | -1123.48075                    | -1123.34339                  | -1123.05865                  | -53                                   |
| TS4 <sub>6c</sub> (1b_t1) | -1123.75496                    | 0.28514           | -1123.46982                    | -1123.33817                  | -1123.05303                  | -39                                   |
| 13b_t1                    | -1123.76803                    | 0.28565           | -1123.48238                    | -1123.34720                  | -1123.06155                  | -61                                   |
| E-13b_t1                  | <b>ring opening</b>            |                   |                                |                              |                              |                                       |
| 14b_t1                    | -1123.75382                    | 0.28552           | -1123.46830                    | -1123.33732                  | -1123.05181                  | -35                                   |
| 15b_t1                    | -1123.77238                    | 0.28691           | -1123.48546                    | -1123.35957                  | -1123.07266                  | -90                                   |
| E-15b_t1                  | -1123.78446                    | 0.28744           | -1123.49703                    | -1123.37118                  | -1123.08375                  | -119                                  |
| 16b_t1                    | -1123.75699                    | 0.28722           | -1123.46977                    | -1123.34765                  | -1123.05999                  | -57                                   |
| 17b_t1                    | -1123.80535                    | 0.28171           | -1123.52365                    | -1123.37546                  | -1123.09375                  | -145                                  |
| E-17b_t1                  | -1123.80239                    | 0.27881           | -1123.52359                    | -1123.37212                  | -1123.09332                  | -144                                  |
| 18b_t1                    | -1123.79752                    | 0.28241           | -1123.51511                    | -1123.37199                  | -1123.08958                  | -134                                  |

<sup>1</sup> B3LYP = B3LYP(SMD,ACN)/6-311+G(2df,p)//B3LYP(SMD,ACN)/6-31G(d,p); M06 = M06-2X(SMD,ACN)/6-

311++G(3df,2pd) //B3LYP(SMD,ACN)/6-31G(d,p). <sup>2</sup>  $E_{\text{scf}}$ ,  $G_{\text{corr}}$ , and  $G_{\text{tot}}$  are given in a.u.  $\Delta G_{\text{rel}}$  is given in kJ mol<sup>-1</sup>.

$\Delta G_{\text{rel}}$  is calculated using the equation:  $\Delta G_{\text{rel}}(\text{Structure}) = G_{\text{tot}}(\text{Structure}) - [G_{\text{tot}}(\mathbf{1b\_t1}) + G_{\text{tot}}(\mathbf{DMAD})]$ .

Table S2. (contd.)

| Structure                 | $E_{\text{scf}}(\text{B3LYP})$ | $G_{\text{corr}}$ | $G_{\text{tot}}(\text{B3LYP})$ | $E_{\text{scf}}(\text{M06})$ | $G_{\text{tot}}(\text{M06})$ | $\Delta G_{\text{rel}}(\text{M06})^3$ |
|---------------------------|--------------------------------|-------------------|--------------------------------|------------------------------|------------------------------|---------------------------------------|
| NCov(1b_t2)               | -1123.73168                    | 0.27424           | -1123.45744                    | -1123.29457                  | -1123.02033                  | 47                                    |
| TS1(1b_t2)                | -1123.71135                    | 0.27763           | -1123.43372                    | -1123.27658                  | -1122.99896                  | 103                                   |
| 10b_t2                    | -1123.74825                    | 0.28251           | -1123.46574                    | -1123.32337                  | -1123.04087                  | -7                                    |
| TS2(1b_t2)                | -1123.73591                    | 0.28194           | -1123.45397                    | -1123.30963                  | -1123.02769                  | 28                                    |
| 11b_t2                    | -1123.74797                    | 0.28155           | -1123.46643                    | -1123.32281                  | -1123.04127                  | -8                                    |
| TS3(1b_t2)                | -1123.74341                    | 0.27793           | -1123.46548                    | -1123.31853                  | -1123.04060                  | -6                                    |
| E-12b_t2                  | -1123.77978                    | 0.28293           | -1123.49685                    | -1123.35683                  | -1123.07390                  | -93                                   |
| Z-12b_t2                  | -1123.78161                    | 0.28416           | -1123.49746                    | -1123.35837                  | -1123.07431                  | -94                                   |
| TS4 <sub>5c</sub> (1b_t2) | -1123.76908                    | 0.28465           | -1123.48444                    | -1123.34549                  | -1123.06084                  | -59                                   |
| TS4 <sub>6c</sub> (1b_t2) | -1123.75413                    | 0.28758           | -1123.46655                    | -1123.33802                  | -1123.05045                  | -32                                   |
| 13b_t2                    | -1123.77072                    | 0.28467           | -1123.48605                    | -1123.34874                  | -1123.06407                  | -68                                   |
| E-13b_t2                  | <b>ring opening</b>            |                   |                                |                              |                              |                                       |
| 14b_t2                    | -1123.75511                    | 0.28576           | -1123.46935                    | -1123.33925                  | -1123.05349                  | -40                                   |
| 15b_t2                    | -1123.77029                    | 0.28685           | -1123.48344                    | -1123.35657                  | -1123.06972                  | -82                                   |
| E-15b_t2                  | -1123.78201                    | 0.28909           | -1123.49292                    | -1123.36947                  | -1123.08038                  | -110                                  |
| 16b_t2                    | -1123.77341                    | 0.28716           | -1123.48625                    | -1123.34868                  | -1123.06070                  | -59                                   |
| 17b_t2                    | -1123.80600                    | 0.28003           | -1123.52597                    | -1123.37515                  | -1123.09512                  | -149                                  |
| E-17b_t2                  | -1123.80312                    | 0.27947           | -1123.52365                    | -1123.37220                  | -1123.09273                  | -143                                  |
| 18b_t2                    | -1123.79875                    | 0.28183           | -1123.51692                    | -1123.37245                  | -1123.09062                  | -137                                  |

<sup>1</sup> B3LYP = B3LYP(SMD,ACN)/6-311+G(2df,p)//B3LYP(SMD,ACN)/6-31G(d,p); M06 = M06-2X(SMD,ACN)/6-311++G(3df,2pd) //B3LYP(SMD,ACN)/6-31G(d,p). <sup>2</sup>  $E_{\text{scf}}$ ,  $G_{\text{corr}}$ , and  $G_{\text{tot}}$  are given in a.u.  $\Delta G_{\text{rel}}$  is given in kJ mol<sup>-1</sup>.  $\Delta G_{\text{rel}}$  is calculated using the equation:  $\Delta G_{\text{rel}}(\text{Structure}) = G_{\text{tot}}(\text{Structure}) - [G_{\text{tot}}(\mathbf{1b\_t2}) + G_{\text{tot}}(\mathbf{DMAD})]$ .

Table S2. (contd.)

| Structure                 | $E_{\text{scf}}(\text{B3LYP})$ | $G_{\text{corr}}$ | $G_{\text{tot}}(\text{B3LYP})$ | $E_{\text{scf}}(\text{M06})$ | $G_{\text{tot}}(\text{M06})$ | $\Delta G_{\text{rel}}(\text{M06})^3$ |
|---------------------------|--------------------------------|-------------------|--------------------------------|------------------------------|------------------------------|---------------------------------------|
| NCov(1c_t1)               | -1242.92411                    | 0.36801           | -1242.55610                    | -1242.42116                  | -1242.05315                  | 30                                    |
| TS1(1c_t1)                | -1242.89782                    | 0.37442           | -1242.52340                    | -1242.40141                  | -1242.02700                  | 99                                    |
| 10c_t1                    | -1242.92199                    | 0.37979           | -1242.54220                    | -1242.43725                  | -1242.05746                  | 19                                    |
| TS2(1c_t1)                | -1242.91392                    | 0.38058           | -1242.53334                    | -1242.42491                  | -1242.04433                  | 53                                    |
| 11c_t1                    | -1242.92932                    | 0.38010           | -1242.54923                    | -1242.44159                  | -1242.06149                  | 8                                     |
| TS3(1c_t1)                | -1242.92108                    | 0.37694           | -1242.54415                    | -1242.43350                  | -1242.05657                  | 21                                    |
| E-12c_t1                  | -1242.96302                    | 0.37984           | -1242.58318                    | -1242.47682                  | -1242.09698                  | -85                                   |
| Z-12c_t1                  | -1242.95167                    | 0.38134           | -1242.57033                    | -1242.47037                  | -1242.08903                  | -64                                   |
| TS4 <sub>sc</sub> (1c_t1) | -1242.93757                    | 0.38311           | -1242.55447                    | -1242.45502                  | -1242.07192                  | -19                                   |
| TS4 <sub>6c</sub> (1c_t1) | <b>ring opening</b>            |                   |                                |                              |                              |                                       |
| 13c_t1                    | -1242.93968                    | 0.38327           | -1242.55641                    | -1242.45808                  | -1242.07481                  | -27                                   |
| E-13c_t1                  | <b>ring opening</b>            |                   |                                |                              |                              |                                       |
| 14c_t1 <sup>4</sup>       | -1242.92886                    | 0.38357           | -1242.54529                    | -1242.44173                  | -1242.05877                  | 15                                    |
| 15c_t1                    | -1242.94126                    | 0.38305           | -1242.55821                    | -1242.46473                  | -1242.08168                  | -45                                   |
| E-15c_t1                  | -1242.95457                    | 0.38457           | -1242.57000                    | -1242.47803                  | -1242.09347                  | -76                                   |
| 16c_t1                    | -1242.92606                    | 0.38447           | -1242.54159                    | -1242.45422                  | -1242.06975                  | -14                                   |
| 17c_t1                    | -1242.98168                    | 0.37785           | -1242.60384                    | -1242.48582                  | -1242.10798                  | -114                                  |
| E-17c_t1                  | -1242.97869                    | 0.37785           | -1242.60084                    | -1242.48509                  | -1242.10724                  | -112                                  |
| 18c_t1                    | -1242.96046                    | 0.37813           | -1242.58233                    | -1242.47065                  | -1242.09252                  | -73                                   |

<sup>1</sup> B3LYP = B3LYP(SMD,ACN)/6-311+G(2df,p)//B3LYP(SMD,ACN)/6-31G(d,p); M06 = M06-2X(SMD,ACN)/6-311++G(3df,2pd) //B3LYP(SMD,ACN)/6-31G(d,p). <sup>2</sup>  $E_{\text{scf}}$ ,  $G_{\text{corr}}$ , and  $G_{\text{tot}}$  are given in a.u.  $\Delta G_{\text{rel}}$  is given in kJ mol<sup>-1</sup>.  $\Delta G_{\text{rel}}$  is calculated using the equation:  $\Delta G_{\text{rel}}(\text{Structure}) = G_{\text{tot}}(\text{Structure}) - [G_{\text{tot}}(\mathbf{1c\_t1}) + G_{\text{tot}}(\mathbf{DMAD})]$ . <sup>4</sup> Partially-optimized point taken from the Scan calculations at the inflection point. Optimization of the TS structure did not converge.

Table S2. (contd.)

| Structure                 | $E_{\text{scf}}(\text{B3LYP})$ | $G_{\text{corr}}$ | $G_{\text{tot}}(\text{B3LYP})$ | $E_{\text{scf}}(\text{M06})$ | $G_{\text{tot}}(\text{M06})$ | $\Delta G_{\text{rel}}(\text{M06})^3$ |
|---------------------------|--------------------------------|-------------------|--------------------------------|------------------------------|------------------------------|---------------------------------------|
| NCov(1c_t2)               | -1242.92146                    | 0.36859           | -1242.55287                    | -1242.41772                  | -1242.04913                  | 41                                    |
| TS1(1c_t2)                | -1242.89318                    | 0.37533           | -1242.51785                    | -1242.39876                  | -1242.02343                  | 108                                   |
| 10c_t2                    | -1242.92400                    | 0.38114           | -1242.54286                    | -1242.43538                  | -1242.05424                  | 27                                    |
| TS2(1c_t2)                | -1242.91212                    | 0.37855           | -1242.53357                    | -1242.41989                  | -1242.04133                  | 61                                    |
| 11c_t2                    | -1242.92485                    | 0.37923           | -1242.54561                    | -1242.43537                  | -1242.05614                  | 22                                    |
| TS3(1c_t2)                | -1242.91580                    | 0.37622           | -1242.53958                    | -1242.42618                  | -1242.04996                  | 38                                    |
| E-12c_t2                  | -1242.95221                    | 0.37937           | -1242.57284                    | -1242.46448                  | -1242.08512                  | -54                                   |
| Z-12c_t2                  | -1242.95012                    | 0.37936           | -1242.57076                    | -1242.46582                  | -1242.08646                  | -57                                   |
| TS4 <sub>sc</sub> (1c_t2) | -1242.94073                    | 0.38303           | -1242.55771                    | -1242.45631                  | -1242.07328                  | -23                                   |
| TS4 <sub>6c</sub> (1c_t2) | ring opening                   |                   |                                |                              |                              |                                       |
| 13c_t2                    | -1242.94293                    | 0.38300           | -1242.55993                    | -1242.45960                  | -1242.07660                  | -32                                   |
| E-13c_t2                  | ring opening                   |                   |                                |                              |                              |                                       |
| 14c_t2                    | ring opening                   |                   |                                |                              |                              |                                       |
| 15c_t2                    | -1242.94526                    | 0.38208           | -1242.56318                    | -1242.46893                  | -1242.08685                  | -58                                   |
| E-15c_t2                  | -1242.95590                    | 0.38296           | -1242.57294                    | -1242.47842                  | -1242.09546                  | -81                                   |
| 16c_t2                    | -1242.92394                    | 0.38368           | -1242.54025                    | -1242.45352                  | -1242.06983                  | -14                                   |
| 17c_t2                    | -1242.97853                    | 0.37646           | -1242.60207                    | -1242.48200                  | -1242.10554                  | -107                                  |
| E-17c_t2                  | -1242.97582                    | 0.37731           | -1242.59850                    | -1242.47947                  | -1242.10216                  | -99                                   |
| 18c_t2                    | -1242.96251                    | 0.37897           | -1242.58354                    | -1242.47340                  | -1242.09443                  | -78                                   |

<sup>1</sup> B3LYP = B3LYP(SMD,ACN)/6-311+G(2df,p)//B3LYP(SMD,ACN)/6-31G(d,p); M06 = M06-2X(SMD,ACN)/6-311++G(3df,2pd) //B3LYP(SMD,ACN)/6-31G(d,p). <sup>2</sup>  $E_{\text{scf}}$ ,  $G_{\text{corr}}$ , and  $G_{\text{tot}}$  are given in a.u.  $\Delta G_{\text{rel}}$  is given in kJ mol<sup>-1</sup>.  $\Delta G_{\text{rel}}$  is calculated using the equation:  $\Delta G_{\text{rel}}(\text{Structure}) = G_{\text{tot}}(\text{Structure}) - [G_{\text{tot}}(\mathbf{1c\_t2}) + G_{\text{tot}}(\mathbf{DMAD})]$ .



### S3. The reaction energy profiles calculated for **1a** and **1c**

Calculation method: M06-2X(SMD=ACN)/6-311++G(3df,2pd)//B3LYP(SMD=ACN)/6-31G(d,p)

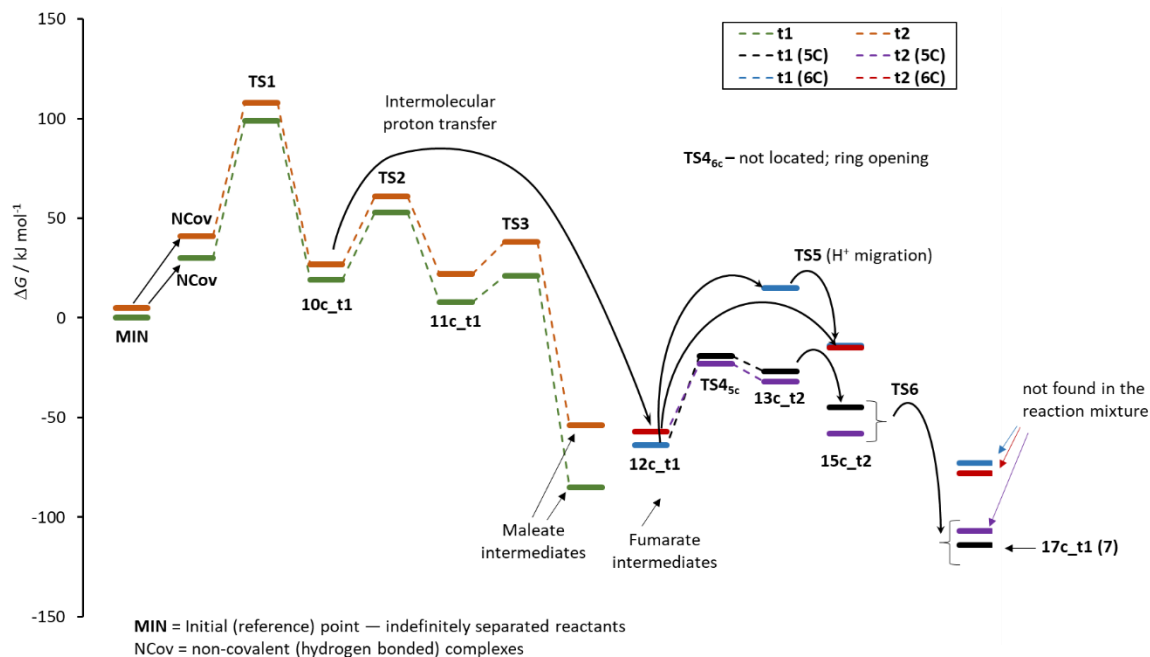

**Figure S1.** Energy profile for the AMA/CYC reaction of the tautomers of furfurylguanidine **1a**. Only the lowest energy points are labeled.

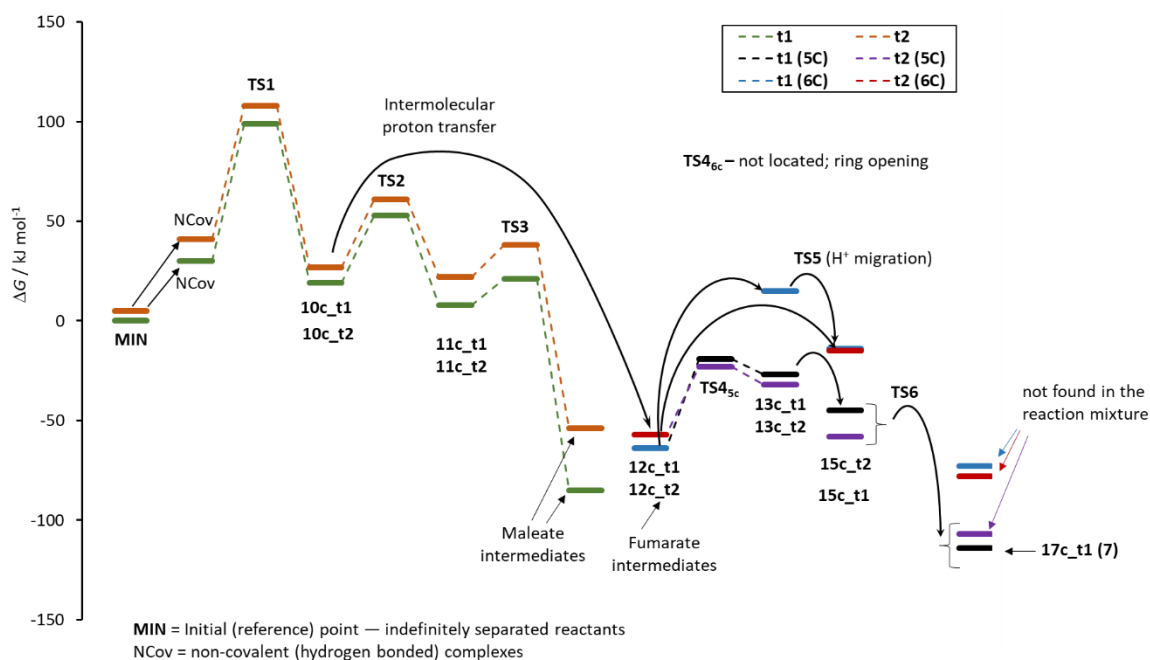

**Figure S2.** Energy profile for the AMA/CYC reaction of the tautomers of furfurylguanidine **1c**. Only the lowest energy points are labeled.

## S4. The Entropy correction approach

- Gibbs energies of the stationary points along the reaction paths starting from **1b\_t1** and **1b\_t2** were corrected for the entropy contributions of the low-energy vibrations.
- The correction approach proposed by Cramer and Truhlar [1] was applied in which all vibrations below 100 cm<sup>-1</sup> were shifted to 100 cm<sup>-1</sup> and the vibrational entropy was recalculated.
- The uncorrected and corrected energy profiles were compared in Figures S3 and S4.
- The color coding was taken from the Figure 3 in the main text.

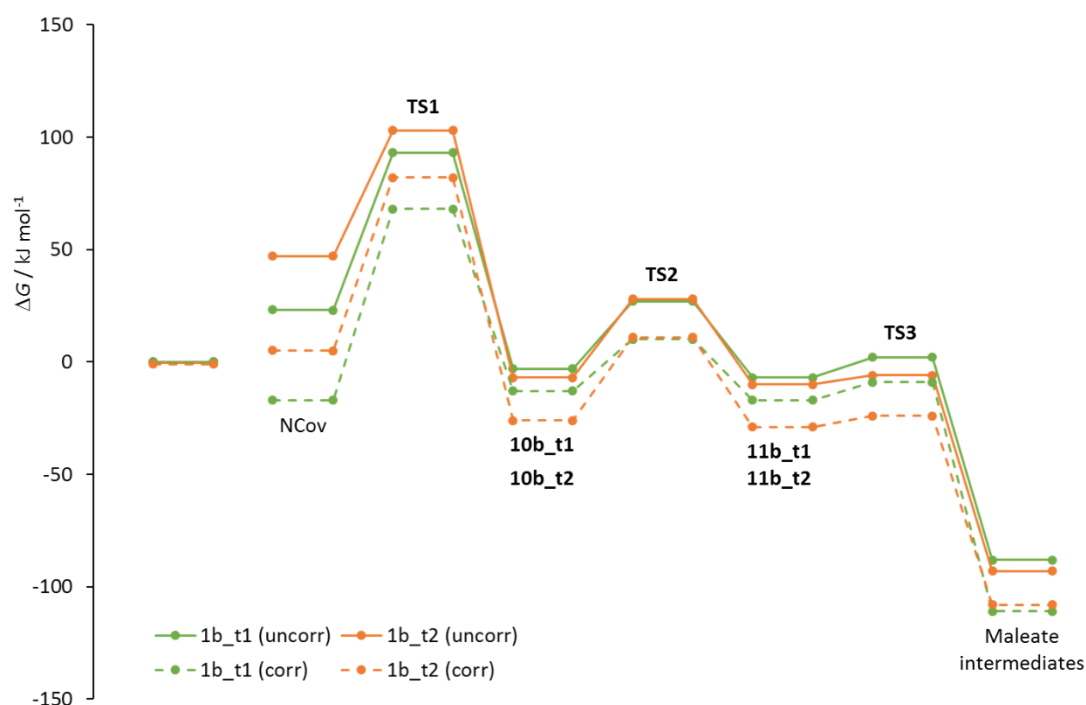

**Figure S3.** The first part of the uncorrected (solid lines) and corrected (dashed lines) reaction profiles starting from **1b\_t1** (green) and **1b\_t2** (yellow) tautomers.

Correction for the entropy contributions lowered the relative energies of covalently bonded structures by approximately 20-30 kJ mol<sup>-1</sup> giving no change in the qualitative interpretation. The main difference is visible in the energetics of the non-covalent intermediates (**NCov**, Fig. S3) where the stabilization amounts more than 40 kJ mol<sup>-1</sup>. This confirms an entropy as the main source of the unusually high energy of the **NCov** type of the intermediates. The barrier for the intramolecular cyclization step was reduced from -53 to -66 kJ mol<sup>-1</sup> (33 and 36 kJ mol<sup>-1</sup> above intermediates **12b\_t1** for the uncorrected and corrected approach, respectively) and they are not considered as the reaction rate determining step. However, they do discriminate between the intramolecular cyclization to the smaller and larger ring. Both approaches predict the formation of the imidazolidinone system as the more favorable process.

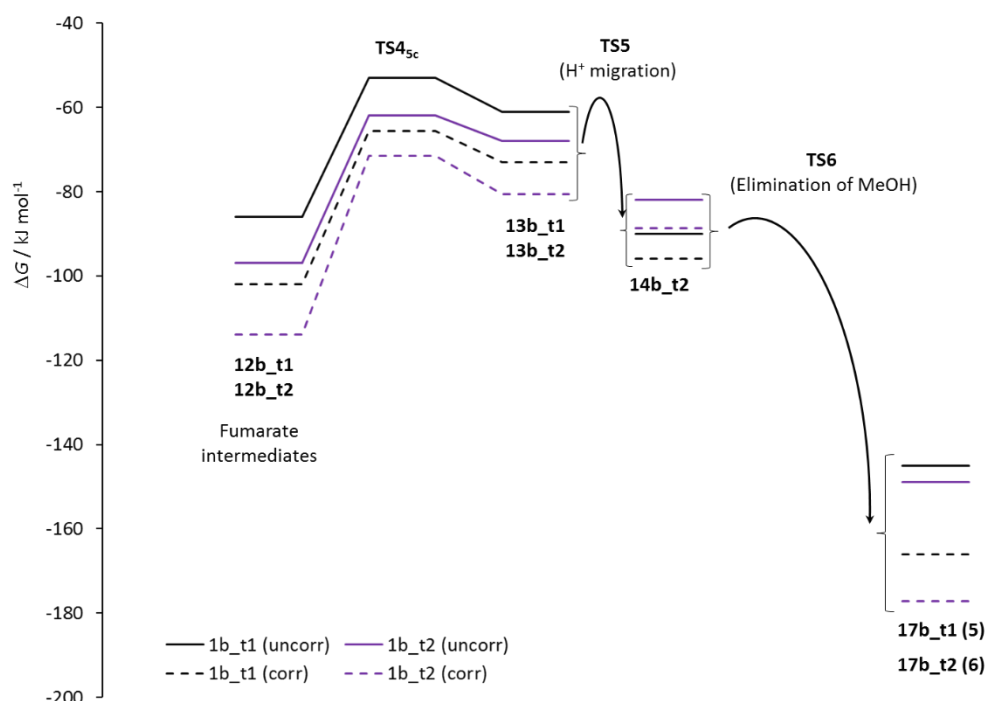

**Figure S4.** The second part of the uncorrected (solid lines) and corrected (dashed lines) reaction profiles starting from **1b\_t1** (black) and **1b\_t2** (purple) tautomers

The second important point is the difference in the relative energies of the products **17b\_t1** and **17b\_t2**. These structures correspond to the isolated products **5** and **6**, respectively, and their energy difference is compared with their relative abundance obtained experimentally (Figure 1, the main text). Entropy corrected approach predicts significantly larger difference in their relative energies ( $11 \text{ kJ mol}^{-1}$ ) with respect to the uncorrected approach ( $4 \text{ kJ mol}^{-1}$ ). Although both approaches favor the same isomer, the large difference obtained by entropy corrected approach would imply the absence of the NMR detectable amount of the other isomer. In this respect, the uncorrected data led to better agreement with the experiment. The described feature is consequence of the molecule of methanol hydrogen bonded to the product that remained for the sake of consistency with other structures along the considered paths. Therefore, we decided to present the uncorrected results since they provide trends in relative energies consistent with the entropy corrected ones and better agreement with the experimental results.

## S5. Comparison of selected density functionals

Relative energies of all possible products (Scheme 1 in the main text) were calculated by five selected DFT methods. Besides B3LYP and M06-2X approach used for the reaction path calculations, The M08-HX in conjunction with the Jensen's polarization consistent basis sets as well as M11 and wB97xD functionals with Dunning's augmented correlation consistent basis sets were employed. These three methods were recommended by Molteni and Ponti [2] and by Yepes et al. [3] as the very good methods for the kinetics and thermodynamics of the reactions.

B3LYP: B3LYP(SMD)/6-311+G(2df,p)//B3LYP(SMD)/6-31G(d,p)

M06-2X: M06-2X(SMD)/6-311++G(3df,2pd)//B3LYP(SMD)/6-31G(d,p)

M08-HX: M08-HX(SMD)/pcseg-3//M08-HX/pcseg-2

M11: M11(SMD)/aug-cc-pvtz//M11(SMD)/6-31+G(d,p)

wB97xD: wB97xD(SMD)/aug-cc-pvtz//wB97xD(SMD)/6-31+G(d,p)

In all cases the solvent of choice was acetonitrile and it was approximated as the dielectric continuum with the dielectric constant of 35.688 as implemented in Gaussian16.

The relative amount of the isomer  $i$  ( $\gamma_i$ ) were calculated using the equation (S1):

$$\gamma_i = e^{-\frac{\Delta G_{\text{rel}}}{RT}} \quad (\text{S1})$$

where  $\Delta G_{\text{rel}}$  is the Gibbs energy of the product  $i$  relative to the most stable product.

This is a variant of the approach used by Molteni and Ponti [2] except that the relative Gibbs energies of the final products instead of the relative enthalpies of the key TS structures were used.

**Table S3.** The product abundances ( $\Upsilon$ ) relative to the most stable one calculated by different DFT approaches using the equation (S1).

| Ratios   | Exp.       | M08-HX                  |             | M06-2X                  |            | M11                     |            | B3LYP                   |            | wB97xD                  |            |
|----------|------------|-------------------------|-------------|-------------------------|------------|-------------------------|------------|-------------------------|------------|-------------------------|------------|
|          | $\Upsilon$ | $\Delta G_{\text{rel}}$ | $\Upsilon$  | $\Delta G_{\text{rel}}$ | $\Upsilon$ | $\Delta G_{\text{rel}}$ | $\Upsilon$ | $\Delta G_{\text{rel}}$ | $\Upsilon$ | $\Delta G_{\text{rel}}$ | $\Upsilon$ |
| 17a_t1   | -          | 21.7                    | 0.00        | 31.2                    | 0.00       | 26.8                    | 0.00       | 22.1                    | 0.00       | 21.3                    | 0.00       |
| E-17a_t1 | -          | 33.3                    | 0.00        | 41.9                    | 0.00       | 35.1                    | 0.00       | 29.6                    | 0.00       | 28.3                    | 0.00       |
| 17a_t2   | 1.00       | 4.3                     | <b>0.18</b> | 14.0                    | 0.00       | 15.9                    | 0.00       | 2.0                     | 0.45       | 12.8                    | 0.01       |
| E-17a_t2 | -          | 25.9                    | 0.00        | 32.3                    | 0.00       | 38.1                    | 0.00       | 17.5                    | 0.00       | 30.2                    | 0.00       |
| 18a_t1   | 0.33       | 0.9                     | <b>0.69</b> | 8.8                     | 0.03       | 4.0                     | 0.20       | 11.1                    | 0.01       | 0.0                     | 1.00       |
| 18a_t2   | 0.39       | 0.0                     | <b>1.00</b> | 0.0                     | 1.00       | 0.0                     | 1.00       | 0.0                     | 1.00       | 4.6                     | 0.16       |
| 17b_t1   | 0.50       | 2.1                     | <b>0.44</b> | 4.7                     | 0.15       | 0.0                     | 1.00       | 10.5                    | 0.01       | 0.1                     | 0.96       |
| E-17b_t1 | -          | 10.2                    | 0.02        | 11.5                    | 0.01       | 8.8                     | 0.03       | 15.1                    | 0.00       | 8.4                     | 0.03       |
| 17b_t2   | 1.00       | 0.0                     | <b>1.00</b> | 0.0                     | 1.00       | 0.5                     | 0.83       | 0.0                     | 1.00       | 0.0                     | 1.00       |
| E-17b_t2 | -          | 8.5                     | 0.03        | 12.7                    | 0.01       | 9.1                     | 0.03       | 14.0                    | 0.00       | 7.6                     | 0.05       |
| 18b_t1   | -          | 14.6                    | 0.00        | 15.2                    | 0.00       | 11.7                    | 0.01       | 31.3                    | 0.00       | 17.9                    | 0.00       |
| 18b_t2   | -          | 18.1                    | 0.00        | 18.9                    | 0.00       | 14.8                    | 0.00       | 36.6                    | 0.00       | 22.2                    | 0.00       |
| 17c_t1   | 1.00       | 0.0                     | <b>1.00</b> | 0.0                     | 1.00       | 0.1                     | 0.94       | 0.0                     | 1.00       | 0.3                     | 0.90       |
| E-17c_t1 | 0.23       | 2.7                     | <b>0.34</b> | 1.7                     | 0.51       | 0.0                     | 1.00       | 4.9                     | 0.14       | 0.0                     | 1.00       |
| 17c_t2   | -          | 9.0                     | 0.03        | 12.2                    | 0.01       | 8.2                     | 0.04       | 8.1                     | 0.04       | 4.8                     | 0.15       |
| E-17c_t2 | -          | 11.6                    | 0.01        | 12.1                    | 0.01       | 14.2                    | 0.00       | 11.1                    | 0.01       | 9.0                     | 0.03       |
| 18c_t1   | -          | 48.3                    | 0.00        | 45.7                    | 0.00       | 45.3                    | 0.00       | 62.3                    | 0.00       | 52.3                    | 0.00       |
| 18c_t2   | -          | 43.5                    | 0.00        | 40.9                    | 0.00       | 38.0                    | 0.00       | 59.3                    | 0.00       | 43.4                    | 0.00       |

## S6. The methanol elimination catalyzed with guanidine

The steps within the suggested mechanism that are assumed to occur due to intermolecular interactions are modeled using guanidine **6rMe** as the catalyst and / or a supporting molecule for the proton shift.

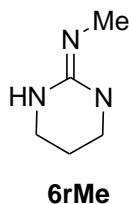

**Figure S5.** Structure of the guanidine catalyst **6rMe** representing the simplified **1b\_t1** structure.

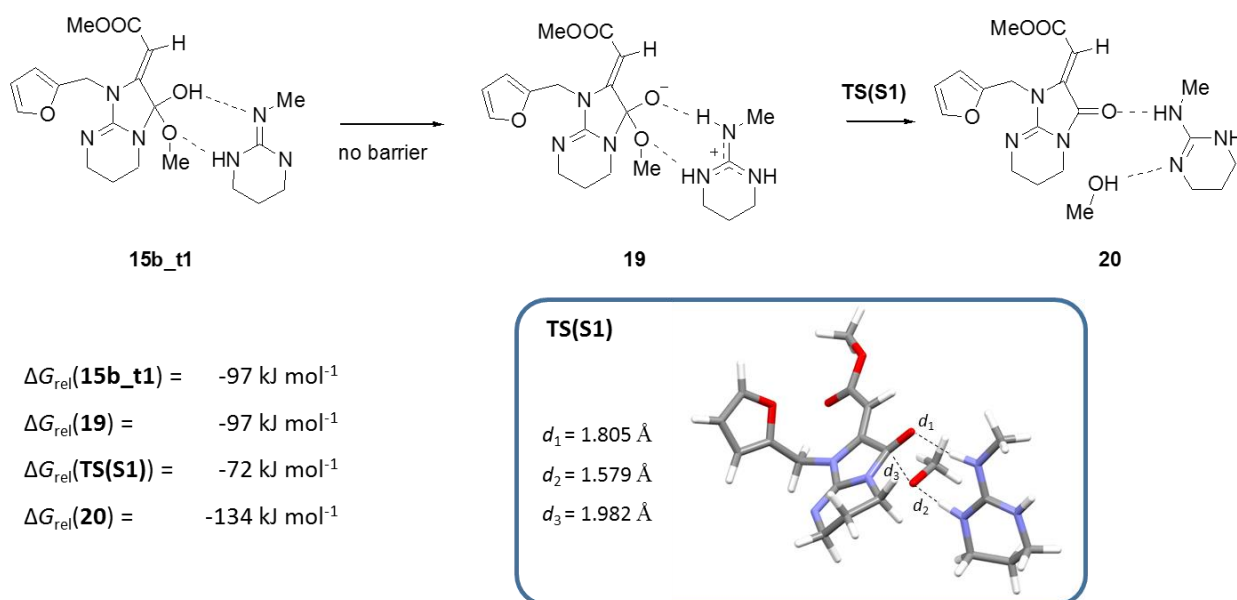

**Figure S6.** Calculated relative Gibbs energies ( $\Delta G_{\text{rel}}$ ) for the methanol elimination step catalyzed with guanidine. The values are calculated relative to the sum of the Gibbs energies of the guanidine **1b\_t1**, **DMAD**, and guanidine catalyst **6rMe**.

## S7. Cartesian coordinates

### S7.1. G3 Optimized geometries

#### **1aH<sup>+</sup>**

C 0.240948 0.079294 0.095551  
N 0.539287 -0.775482 1.069933  
C 1.691474 -0.301009 1.835088  
C 2.319614 0.693091 0.850583  
N 1.179241 1.008427 -0.010802  
H -0.161131 -1.363768 1.471251  
H 2.352255 -1.117766 2.07947  
H 1.366003 0.185402 2.745633  
H 3.11297 0.239966 0.270598  
H 2.689517 1.583472 1.333902  
H 1.267658 1.597262 -0.811101  
N -0.838966 -0.01549 -0.649608  
C -1.237514 0.934633 -1.689527  
C -2.204148 0.298663 -2.626612  
H -1.698941 1.806636 -1.246366  
H -0.357954 1.2472 -2.235631  
C -3.502415 0.521682 -2.875804  
C -3.874539 -0.411296 -3.909713  
C -2.764774 -1.109928 -4.182114  
O -1.739833 -0.693228 -3.415159  
H -2.551639 -1.903444 -4.866162  
H -4.834959 -0.528763 -4.368235  
H -4.125434 1.249555 -2.397122  
H -1.515373 -0.696529 -0.368689

#### **1a\_t1**

C 0.2608827016 0.0087151 0.0148626769  
N 0.5238908068 -0.6899281043 1.1692605503  
C 1.4359817557 0.0697103675 2.0110698943  
C 2.1905759698 0.8838675528 0.9613506762  
N 1.166188066 1.0357365116 -0.0635825119  
H -0.2563416204 -1.1433421307 1.5956724637  
H 2.0845170285 -0.5817886694 2.579576002  
H 0.9022510115 0.7201418547 2.6979636241  
H 3.0497022119 0.3372464552 0.5852134001  
H 2.5206611301 1.8438440751 1.3322867752  
H 1.4437221827 1.3502698813 -0.9690395245  
N -0.6784904255 -0.2912129713 -0.7837502927  
C -0.829134663 0.5223865551 -1.9671088979  
C -2.0571060985 0.1122591541 -2.7174887201  
H -0.9135182195 1.5841731777 -1.7331912756  
H 0.0226587475 0.4322208459 -2.6427888167  
C -3.0136544992 -0.807847801 -2.5173689761  
C -3.9265134073 -0.682779829 -3.6301538681

C -3.4367646474 0.2983968533 -4.3957838966  
O -2.3014302085 0.7928299764 -3.8564402763  
H -3.7589271619 0.7448048055 -5.3123338391  
H -4.8144806869 -1.253676568 -3.8128216976  
H -3.0781739736 -1.4910590923 -1.6969584697

#### 1a\_t2

C 0.2690074093 0.1504381254 0.1251336102  
N 0.170758332 -0.0568173271 1.4882380095  
C 1.3106969397 0.6424850221 2.0771228312  
C 2.2505316742 0.7407672217 0.8608623302  
N 1.3877685517 0.5726152523 -0.3074641278  
H -0.7257621672 0.1199024082 1.8943315949  
H 1.7344514167 0.084901831 2.9015531002  
H 1.0197640639 1.624917576 2.4367425044  
H 3.0013067564 -0.0454962608 0.8845738311  
H 2.7774852921 1.6873682268 0.8270036437  
N -0.8281684481 -0.108655506 -0.6366423696  
C -0.7063911893 -0.1904765877 -2.0824176756  
C -2.0508113953 -0.2333042369 -2.7274166965  
H -0.1647086725 0.6804614911 -2.4245496205  
H -0.1505997792 -1.0688688172 -2.393542841  
H -1.4736527537 -0.7536825011 -0.2298903168  
C -2.6777032638 -1.1719952786 -3.4530881484  
C -3.9550953421 -0.6106397278 -3.81802307  
C -3.9783314911 0.6134511234 -3.2759864398  
O -2.8327904211 0.8608279017 -2.6123369135  
H -4.7063027782 1.3965537219 -3.2718321418  
H -4.72910089 -1.0690378587 -4.3991257775  
H -2.2950048444 -2.1404287996 -3.7046023165

#### 1bH<sup>+</sup>

C -0.0635268286 1.063706493 -0.1261343825  
N -0.2143293604 2.0040809079 0.7891350673  
N 1.0862015624 0.9176435085 -0.7793203841  
C -1.4498963231 2.2169829854 1.5456090675  
H 0.5125778103 2.6755156092 0.9054254478  
C -2.2283321298 0.9150411338 1.6327857116  
H -1.1690190909 2.5714781079 2.5264599259  
H -2.0389621431 2.9851368307 1.0592085987  
C -2.3740645773 0.3142481978 0.2444284089  
H -1.7083132742 0.2175452924 2.2805324251  
H -3.2067100032 1.105984745 2.0554008911  
N -1.0568130872 0.2264892128 -0.382391871  
H -2.7752614784 -0.6872991932 0.2911123176  
H -3.0319676902 0.9185472038 -0.3692179186  
H -0.9036108109 -0.4780494903 -1.0726384457  
C 2.2667867589 1.7661728268 -0.6278839173  
H 2.1047382698 2.7371381643 -1.0779637805  
H 2.4723411757 1.9030919659 0.42616609



C 3.4419765691 1.1251657261 -1.2805370359  
C 4.1746551863 1.4548100797 -2.3537716488  
C 5.1902688884 0.4383015276 -2.4693052613  
C 4.9700164267 -0.4092458915 -1.4559686215  
O 3.9145686735 -0.0090954749 -0.7220972473  
H 5.4557014092 -1.3063347321 -1.1360224989  
H 5.9617158205 0.3672810169 -3.208426889  
H 4.0253773776 2.3044986085 -2.988448748  
H 1.0833588684 0.2773496376 -1.5456703009

#### 1b\_t1

C 0.0563616708 0.8727678337 0.0289373934  
N -0.1367422221 1.9118033237 0.8910014106  
N 1.1292724993 0.6390238666 -0.6271904361  
C -1.4485282871 2.3376443382 1.3654210562  
H 0.5424235338 2.6381478312 0.8416492765  
C -2.3536530837 1.1313083454 1.5465590509  
H -1.3074254372 2.8610020958 2.3022964083  
H -1.900292424 3.0338968733 0.663078398  
C -2.3436890775 0.310967941 0.2680828253  
H -1.9983584321 0.5226506391 2.3722339115  
H -3.3609260623 1.4597578707 1.7762100921  
N -0.9697730282 -0.0323959111 -0.0575844754  
H -2.894954435 -0.6118201195 0.3949831713  
H -2.818219786 0.8712187113 -0.5357519927  
H -0.8437082656 -0.6783713955 -0.8070202215  
C 2.25079033 1.5390534399 -0.4590356269  
H 2.031587097 2.5515623578 -0.7955560577  
H 2.5584311339 1.6193540051 0.5845387965  
C 3.4281571885 1.0683680449 -1.2508916529  
C 4.096369515 1.5936816158 -2.2903517963  
C 5.1585206472 0.6662274981 -2.5984116504  
C 5.0327948643 -0.3308729649 -1.7145788702  
O 3.9918186668 -0.1026947049 -0.8886831012  
H 5.5797788127 -1.2346670154 -1.5493068703  
H 5.8967056827 0.7487630124 -3.3702484604  
H 3.8743638989 2.5171804675 -2.786102579

#### 1b\_t2

C -0.8959972992 -0.0052116743 -0.3674442102  
N -1.4962866005 0.1609243595 0.7389442035  
C -1.1229426469 1.2954887945 1.5703086698  
N 0.0175642726 0.8524938874 -0.9309884048  
H 0.6400717452 0.4309949632 -1.5879765324  
N -1.1405077178 -1.116425785 -1.1463735282  
C -2.2655895335 -1.9806085937 -0.8365210313  
C -2.2597868209 -3.1866483043 -1.7160129156  
H -2.1887211697 -2.2857227382 0.1973479426  
H -3.2180734847 -1.4746019729 -0.9585800454  
O -1.2515322933 -4.0702219739 -1.5568446371

C -1.4503954214 -5.0770143705 -2.4292635115  
C -2.5617063544 -4.8675580191 -3.1459885592  
C -3.0970474417 -3.6141274416 -2.6739282407  
H -3.9836275137 -3.1157823482 -3.0103305291  
H -2.9614532302 -5.5036968418 -3.9092278745  
H -0.7235771876 -5.8611677899 -2.4209284797  
H -2.0130415435 1.6403767195 2.0872804189  
H -0.4326842102 0.9624886153 2.3441175115  
C -0.4944122184 2.4507458764 0.7959007001  
C 0.5952206086 1.9060128699 -0.1128829648  
H -0.0819389994 3.1872288389 1.4776629268  
H -1.2502392069 2.9447339731 0.1912463784  
H -1.0161393491 -0.9552843756 -2.1250508428  
H 0.982523256 2.6742685019 -0.7705188794  
H 1.4245223606 1.5301778291 0.4828444351

### 1cH<sup>+</sup>

C 0.1455778506 0.4814245667 0.9232843496  
N 0.6426521833 0.260374922 2.130692018  
N 0.9560799872 0.8401061104 -0.0705857116  
N -1.1559456002 0.364581104 0.6976572543  
H 0.0402463456 -0.1840098514 2.7896549604  
C 2.0081060785 0.5353641224 2.6065278875  
H -1.4408731894 0.307495424 -0.2564837146  
C -2.2243555324 0.1553613286 1.6867810245  
H -1.8948215934 0.5933166476 2.6183716436  
C -3.4582348021 0.914080073 1.2107900074  
C -2.5096558617 -1.3313218703 1.8861623506  
C 1.916333676 1.0081682567 4.0530932537  
C 2.8977127333 -0.6965223951 2.4628465641  
H 2.4056127033 1.3444198576 2.0098274386  
C 0.5666053933 1.3875336902 -1.3657966962  
C 0.463405125 0.3598251154 -2.4440168704  
H 1.3222167692 2.1056052374 -1.6467318118  
H -0.3658772844 1.9245737487 -1.256813879  
O -0.5164619034 -0.5622059715 -2.32045398  
C -0.4431956698 -1.3788038791 -3.3926323392  
C 0.5542515473 -1.001383225 -4.2009723303  
C 1.1558828956 0.1493131599 -3.5718143753  
H 1.9865939486 0.7258580949 -3.9249829601  
H 0.8414791469 -1.4654808721 -5.122224255  
H -1.1603986256 -2.1701924043 -3.4343004313  
H 1.9347065414 0.7187658041 0.0722582052  
H -3.2911574273 -1.4638519705 2.6271281975  
H -2.8401115199 -1.7825383483 0.9554280455  
H -1.6264944921 -1.8619155813 2.2267041912  
H -4.2632514282 0.7957016103 1.9274406949  
H -3.244559927 1.9721162917 1.1045924947  
H -3.8004395261 0.5330778922 0.2526450101  
H 2.9072820441 1.2363807404 4.4293104796

|   |              |               |              |
|---|--------------|---------------|--------------|
| H | 1.3047557981 | 1.9005541914  | 4.1305701845 |
| H | 1.4844238651 | 0.2373362633  | 4.6851300789 |
| H | 3.9007344525 | -0.4734978698 | 2.8115894151 |
| H | 2.5053946297 | -1.5196634488 | 3.0523765427 |
| H | 2.9627806684 | -1.0188395653 | 1.4285342335 |

#### 1c\_t1

|   |               |               |               |
|---|---------------|---------------|---------------|
| C | 1.3002778968  | 0.2686462433  | 0.9113701204  |
| N | 2.5838195682  | 0.660842059   | 0.5645107507  |
| N | 1.0793000687  | -0.9641170965 | 1.2599466662  |
| N | 0.3397381908  | 1.2655317393  | 0.8437319688  |
| C | 0.6350424441  | 2.7033146078  | 0.9146308623  |
| H | -0.5087573427 | 1.0345657373  | 1.3550774655  |
| H | 2.6207358044  | 1.4256365991  | -0.1055488322 |
| C | 3.6169327516  | -0.3471940288 | 0.3208844017  |
| C | -0.2736144635 | -1.2821155915 | 1.7060950472  |
| C | 1.2064920759  | 3.1143812553  | 2.2662119709  |
| C | -0.6547471467 | 3.4469266364  | 0.6025316666  |
| H | 1.3579834602  | 2.9432121294  | 0.1283821428  |
| H | 3.5592706908  | -1.0528184081 | 1.1537052467  |
| C | 3.3974028367  | -1.1035148249 | -0.984098094  |
| C | 4.9666154525  | 0.3536831669  | 0.3434885284  |
| H | -1.0202011071 | -1.0720544321 | 0.9223607866  |
| H | -0.5781648896 | -0.7027610973 | 2.5931137603  |
| C | -0.3598315473 | -2.717533343  | 2.076026415   |
| H | 4.1797190828  | -1.8555121627 | -1.1319275111 |
| H | 2.4295176674  | -1.6093093941 | -0.9721280247 |
| H | 3.425517964   | -0.4088945271 | -1.8309079977 |
| H | 5.7757811923  | -0.3682862955 | 0.1988129434  |
| H | 5.0257572918  | 1.0945954794  | -0.4618265565 |
| H | 5.1222271865  | 0.8668579785  | 1.2965555933  |
| H | -0.4817484149 | 4.5266897375  | 0.6080950593  |
| H | -1.0417764191 | 3.158720166   | -0.3785234356 |
| H | -1.4156972742 | 3.2200359215  | 1.357573388   |
| H | 1.4174550348  | 4.1886696203  | 2.2831713882  |
| H | 0.4842918314  | 2.8913642457  | 3.0587642597  |
| H | 2.1345079603  | 2.5769079524  | 2.474260861   |
| C | -0.5064014601 | -3.3856175978 | 3.2615447257  |
| C | -0.4970934886 | -4.779644484  | 2.954713501   |
| C | -0.3434073131 | -4.8693868051 | 1.6012392065  |
| O | -0.2597707004 | -3.6219364881 | 1.0495326762  |
| H | -0.2798355812 | -5.6962878285 | 0.9077441728  |
| H | -0.5908891385 | -5.6085596162 | 3.6440372356  |
| H | -0.6074261648 | -2.9272122537 | 4.237075641   |

#### 1c\_t2

|   |               |              |               |
|---|---------------|--------------|---------------|
| C | -0.8493651505 | 0.0296617036 | -0.4755077332 |
| N | -1.4173967759 | 0.1445053501 | 0.683188617   |
| C | -1.0363311814 | 1.2496630486 | 1.5594842097  |
| N | 0.0103004258  | 0.93708443   | -1.0826912611 |

C 1.1037968169 0.5128860623 -1.97242643  
N -1.1098861766 -1.0978468529 -1.2506358295  
C -2.1616635138 -2.0019589569 -0.7931612411  
C -2.2390548129 -3.1787782593 -1.6927555032  
H -1.921634921 -2.3145786924 0.226482149  
H -3.1492770002 -1.5210948853 -0.7579431415  
O -1.1914508824 -4.063193456 -1.649021462  
C -1.4630007933 -5.0518508669 -2.5521779707  
C -2.6584702993 -4.8171079094 -3.1683161674  
C -3.1600644506 -3.6023568518 -2.613406689  
H -4.0868028915 -3.0990755228 -2.8580129047  
H -3.1203515266 -5.4379097872 -3.9247138497  
H -0.7199983373 -5.8330243847 -2.631777513  
C -1.2687612065 0.8071174347 2.9972071212  
H 0.0336540308 1.4989604749 1.4580400551  
C -1.8568696797 2.4935114047 1.2290477537  
H 0.3197941094 1.6645873303 -0.4415991357  
C 1.715013975 1.7689793055 -2.5736219071  
C 2.1466321546 -0.3287254073 -1.2476094115  
H 0.6675070875 -0.0775600204 -2.7831637291  
H 2.9449662135 -0.6283205543 -1.9346896807  
H 2.5927410873 0.2494480587 -0.4312511009  
H 1.6943835995 -1.2329842802 -0.8323886528  
H -0.9905365755 1.5975847482 3.702028208  
H -2.3256394434 0.5634624581 3.145505605  
H -0.6768967296 -0.0843765532 3.2250353453  
H -1.6202168444 3.3149634772 1.9136422398  
H -1.6650567667 2.8327046917 0.2066858003  
H -2.9230448103 2.2620358699 1.3193841095  
H -1.1750645107 -0.900667765 -2.2473790402  
H 2.5135262922 1.5071914121 -3.2735631465  
H 0.9589477426 2.3518584634 -3.1066437916  
H 2.1458787451 2.3965292823 -1.7854429217

## 9H

C -0.25033607 0.2469728768 -0.0682378327  
O -0.0879080996 0.0199175077 1.2044321856  
O 0.6098658934 0.6048621792 -0.8107262294  
C 1.219197842 0.2152185245 1.747394019  
C -1.6647266216 0.0124187944 -0.5439916635  
H 1.1342417831 -0.0232833044 2.7949185209  
H 1.9235384055 -0.4466736718 1.2664489254  
H 1.5247945338 1.2426241657 1.6187323895  
C -1.9290223098 0.2168621039 -1.8223593571  
C -3.2351045936 0.0548646446 -2.5233679005  
O -3.089216152 0.3549315967 -3.7958336145  
O -4.2625170858 -0.2891939771 -2.0312043526  
C -4.2397374224 0.2584397588 -4.6309068509  
H -3.9086154327 0.5423232593 -5.6168895336  
H -4.612823385 -0.7552522454 -4.639830199

H -5.0103224164 0.9329402623 -4.2872601588  
Cl -2.8150467336 -0.5056524046 0.636991996  
H -1.1130271351 0.5380469296 -2.4384543437

#### DMAD

C 0.0717134319 0.0295736226 -0.2122909237  
O -0.0404939993 -0.0291039367 1.0862694224  
O 1.0853985399 0.0392649684 -0.831708356  
C 1.1694731379 -0.0873043413 1.8493161106  
C -1.2408324254 0.0838802585 -0.856448544  
H 0.8558111084 -0.1353361902 2.8789255976  
H 1.7320101712 -0.9697625444 1.5844524664  
H 1.7596918847 0.7998659093 1.6758817414  
C -2.2887206424 0.1254068029 -1.4104633133  
C -3.58123962 0.2204931764 -2.089450081  
O -4.0779973878 -0.9619112238 -2.3291137149  
O -4.0787092372 1.2628231649 -2.3676575893  
C -5.3455360024 -1.0210925964 -2.9920514351  
H -5.5704053433 -2.0706344295 -3.0852329064  
H -6.0977408417 -0.5251541914 -2.3974369306  
H -5.2753887745 -0.5624474492 -3.9668505438

#### S7.2. B3LYP Optimized geometries (from 1a tautomers)

##### 1a\_t1

C 0.272352 -0.009719 0.01303  
N 0.550169 -0.717592 1.175585  
C 1.441815 0.071384 2.029531  
C 2.191558 0.907206 0.981699  
N 1.163125 1.053039 -0.054921  
H -0.235466 -1.19078 1.604889  
H 2.11082 -0.56596 2.612493  
H 0.883223 0.719253 2.71941  
H 3.071179 0.368603 0.60484  
H 2.512619 1.877019 1.369083  
H 1.455923 1.359399 -0.974573  
N -0.671349 -0.331952 -0.803207  
C -0.815241 0.499977 -1.986651  
C -2.052696 0.112524 -2.735445  
H -0.873466 1.575697 -1.740786  
H 0.04736 0.408287 -2.671776  
C -3.040568 -0.803237 -2.524573  
C -3.958577 -0.675425 -3.624538  
C -3.46218 0.306994 -4.421993  
O -2.297784 0.799822 -3.894635  
H -3.788266 0.75578 -5.348479  
H -4.864249 -1.242188 -3.792412  
H -3.103805 -1.483163 -1.688126

**1a\_t2**

C 0.276957 0.103401 0.1375  
N 0.212029 -0.117316 1.516392  
C 1.314908 0.6736 2.090454  
C 2.236377 0.836415 0.855237  
N 1.376559 0.609615 -0.321674  
H -0.701115 0.011227 1.940857  
H 1.795264 0.148144 2.920425  
H 0.957082 1.645426 2.456085  
H 3.048299 0.094522 0.872494  
H 2.707721 1.824847 0.8213  
N -0.817424 -0.228571 -0.618672  
C -0.708883 -0.287775 -2.076931  
C -2.047442 -0.262266 -2.731584  
H -0.11138 0.572966 -2.391502  
H -0.181549 -1.189406 -2.416685  
H -1.437205 -0.914183 -0.203796  
C -2.736851 -1.176974 -3.473198  
C -3.977134 -0.556471 -3.844132  
C -3.952104 0.689463 -3.29791  
O -2.784969 0.888636 -2.617733  
H -4.6468 1.516413 -3.297537  
H -4.775179 -0.983347 -4.435451  
H -2.399814 -2.173079 -3.725296

**NCov(1a\_t1)**

C 1.0838098504 0.4074396551 2.0668025817  
N 1.6672426181 0.1903451158 3.3111579633  
C 2.8977242507 0.9825497445 3.4251686561  
C 2.6076086083 2.1302584567 2.4471572431  
N 1.7631833004 1.4548439369 1.4604518119  
H 1.6905155128 -0.761563726 3.6545320878  
H 3.7779795988 0.4081312044 3.1069447265  
H 3.0580245598 1.3318986319 4.4480394388  
H 3.5166356341 2.5334109581 1.9941107381  
H 2.0758370056 2.9487325295 2.9531205817  
H 1.2255350792 2.0127641505 0.8049370388  
N 0.0850021586 -0.198401395 1.5186450046  
C -0.5075165965 -1.2991379669 2.2797812943  
C -1.8801309557 -1.6315046869 1.7923364697  
H 0.0907756554 -2.2193324068 2.1956366747  
H -0.5689055016 -1.0698745676 3.3570927637  
O -2.8746382945 -0.7250519346 2.0629695873  
C -4.0337862729 -1.2207596016 1.533857378  
C -3.8051610426 -2.4221908265 0.9381147977  
C -2.4036803235 -2.6885975337 1.1068388067  
H -1.8547879109 -3.5540335157 0.7615459759  
H -4.5382419049 -3.0431323548 0.4418493956  
H -4.915892626 -0.6132178115 1.6715922013  
C 0.9534576891 0.084766917 -2.7130042903

C 0.1818036055 0.7195379679 -2.0288004378  
C 1.8868620609 -0.742049209 -3.4563753151  
C -0.679741119 1.5510497032 -1.2099387079  
O 2.0263923741 -0.3018182669 -4.7091273214  
O 2.4501096834 -1.7024378721 -2.9699768834  
C 2.941822905 -1.0577672061 -5.5413545786  
O -1.9379189086 1.1229500591 -1.2389817026  
O -0.273369386 2.5284119122 -0.6051382919  
C -2.8702459303 1.8534281486 -0.4012866557  
H -2.5645644959 1.7762671929 0.6431176867  
H -2.9128638639 2.9005797291 -0.7071395841  
H -3.8323969615 1.3688966087 -0.5578100977  
H 2.9231135548 -0.5614895603 -6.5104009147  
H 3.9475513338 -1.031784408 -5.1166755264  
H 2.6033670554 -2.091840772 -5.6333115963

#### NCov(1a\_t2)

C 0.4974175568 -1.125426568 0.810625074  
N 0.7237104639 -2.1295917612 1.7591915778  
C 2.1319801692 -2.5265155677 1.5819140104  
C 2.7063152027 -1.2860433225 0.853486004  
N 1.5481569153 -0.5986744069 0.2588465225  
H 0.0513352141 -2.8899898258 1.7643007541  
H 2.2095073771 -3.4295443147 0.96178645  
H 2.61588833 -2.7258903509 2.54215282  
H 3.4450232299 -1.5625955111 0.0922804775  
H 3.2157921508 -0.61849432 1.5651504295  
N -0.7840771456 -0.743148826 0.5392358239  
H -0.8953921047 0.0551357546 -0.0759442149  
C -1.9467996382 -1.120365202 1.3409671349  
C -2.6614595547 -2.3434292511 0.8571211926  
H -1.6434829986 -1.2579674491 2.3855397029  
H -2.655245858 -0.2894315791 1.3180750479  
O -2.0090939173 -3.5420837449 1.0195555344  
C -2.8186556811 -4.5208234773 0.5093715649  
C -3.9696733748 -3.9753547801 0.0340736116  
C -3.866895159 -2.5600814055 0.2588965863  
H -4.5954036528 -1.8015734856 0.0075933705  
H -4.7917230235 -4.5100161995 -0.421185013  
H -2.4349899521 -5.5286515806 0.5635711881  
C 1.3795906825 2.8043329867 -0.5199838579  
C 0.2080640027 2.8565794395 -0.8207978871  
C 2.7571111516 2.7344316721 -0.0658290029  
C -1.1966786118 2.7577062711 -1.1549893308  
O 3.5838769315 2.4701416517 -1.079185057  
O 3.077936962 2.9058688588 1.0932850427  
C 4.988270233 2.3705544672 -0.733677373  
O -1.6816134633 3.9027093707 -1.624949589  
O -1.8308738269 1.7244031632 -1.011593654  
C -3.0878413125 3.8969141946 -1.9856277959

|   |               |              |               |
|---|---------------|--------------|---------------|
| H | 5.499573521   | 2.1653781333 | -1.6729346351 |
| H | 5.3393352572  | 3.3103738267 | -0.3026601429 |
| H | 5.1457362392  | 1.5544210998 | -0.0254296473 |
| H | -3.2934561829 | 4.9046454396 | -2.3426132197 |
| H | -3.2708609688 | 3.1642647406 | -2.7739652073 |
| H | -3.6990231638 | 3.6662158594 | -1.1108682928 |

#### TS1(1a\_t1)

|   |               |               |               |
|---|---------------|---------------|---------------|
| C | -0.4993518012 | 0.0086627884  | -0.2499200529 |
| N | -0.0479819636 | -0.2960267642 | 1.0210980303  |
| C | 0.8948592749  | 0.7355952549  | 1.4737008795  |
| C | 0.4513349547  | 1.9397533278  | 0.6322063156  |
| N | -0.0778656858 | 1.2811332132  | -0.566591274  |
| H | 0.1763243596  | -1.2616306248 | 1.224408606   |
| H | 1.9305702577  | 0.4526774186  | 1.2463778264  |
| H | 0.8057610152  | 0.9155604681  | 2.5472555527  |
| H | 1.2798768219  | 2.6087220164  | 0.3889675026  |
| H | -0.3264518193 | 2.5171862246  | 1.1498889302  |
| H | -0.6418204334 | 1.8330774001  | -1.2096089065 |
| N | -1.2144237287 | -0.7386518315 | -1.0356396305 |
| C | -1.5599675005 | -2.0911613422 | -0.6057575567 |
| C | -2.8057569332 | -2.5836054659 | -1.2665256732 |
| H | -0.7586341467 | -2.7991013928 | -0.8499331133 |
| H | -1.708697499  | -2.1277258211 | 0.4844273053  |
| O | -3.9762258338 | -1.9460699747 | -0.9446297298 |
| C | -4.9795647279 | -2.5648110349 | -1.6351474429 |
| C | -4.4799187055 | -3.5838843491 | -2.3851878974 |
| C | -3.0639332588 | -3.5954472616 | -2.1454590048 |
| H | -2.3317164677 | -4.267601385  | -2.5709699587 |
| H | -5.0435769733 | -4.2439928594 | -3.0298515342 |
| H | -5.9722448327 | -2.1659960117 | -1.4863004259 |
| C | -1.3937933792 | -0.1669754848 | -3.1482180542 |
| C | -2.0039181803 | 0.8945535031  | -3.367624295  |
| C | -0.6564255603 | -1.2929777294 | -3.7418566721 |
| C | -2.5873523194 | 2.1034113337  | -2.8779221019 |
| O | -1.0002708644 | -1.4068478671 | -5.0391158802 |
| O | 0.1576670981  | -2.0060114048 | -3.1919238154 |
| C | -0.3083258981 | -2.4398797874 | -5.7744951295 |
| O | -3.9005479047 | 2.1956362935  | -3.1449879606 |
| O | -1.9457299623 | 2.9749721905  | -2.2920513495 |
| C | -4.5624167388 | 3.3776889735  | -2.6438139794 |
| H | -4.4830402782 | 3.4323872349  | -1.5554233591 |
| H | -4.1308822573 | 4.2776982768  | -3.087925967  |
| H | -5.6053676919 | 3.2724801413  | -2.9415169266 |
| H | -0.7040338838 | -2.3857628423 | -6.7883677346 |
| H | 0.7685980598  | -2.2555768453 | -5.7763154919 |
| H | -0.5111366121 | -3.4213109792 | -5.339397031  |

#### TS1(1a\_t2)

|   |              |              |               |
|---|--------------|--------------|---------------|
| C | 0.0812954888 | 0.1558044619 | -0.6576379496 |
|---|--------------|--------------|---------------|



|   |               |               |               |
|---|---------------|---------------|---------------|
| N | -0.1349458845 | -0.4534805767 | 0.5666811136  |
| C | 1.1878314405  | -0.5907194628 | 1.2020584684  |
| C | 2.005692204   | 0.4779516826  | 0.4425531785  |
| N | 1.2742962238  | 0.6748126891  | -0.8225471645 |
| H | -0.7318029364 | -1.274284383  | 0.5709366175  |
| H | 1.5930246088  | -1.5973583396 | 1.0393917846  |
| H | 1.1326069084  | -0.4057560513 | 2.2775781775  |
| H | 3.0352720206  | 0.1677358042  | 0.2588731204  |
| H | 2.0393460712  | 1.4198590826  | 1.0067163791  |
| N | -0.9113198778 | 0.2203470146  | -1.5737310496 |
| H | -0.7213570937 | 0.7429456178  | -2.4171527112 |
| C | -2.3078753334 | -0.1387440935 | -1.3195781609 |
| C | -2.6475746754 | -1.5582296246 | -1.6410507583 |
| H | -2.5485072137 | 0.0765364523  | -0.2723519866 |
| H | -2.9275324352 | 0.5133951608  | -1.9376641962 |
| O | -2.1407654442 | -2.5157675333 | -0.795338766  |
| C | -2.5536839488 | -3.7332927626 | -1.2644225927 |
| C | -3.3134326568 | -3.5721242955 | -2.3804364445 |
| C | -3.3734263472 | -2.1581852792 | -2.6260742193 |
| H | -3.8893614559 | -1.6533321663 | -3.4310475553 |
| H | -3.776275592  | -4.3591748183 | -2.9593889708 |
| H | -2.2289288474 | -4.5938962678 | -0.6989375144 |
| C | 1.4076885549  | 2.4610853151  | -2.0124473201 |
| C | 0.3639895724  | 3.0960153163  | -2.2437826287 |
| C | 2.8592773297  | 2.4410895168  | -2.2501839298 |
| C | -1.0253506066 | 3.3978832013  | -2.3211154019 |
| O | 3.1333609302  | 3.1213748988  | -3.3812636707 |
| O | 3.7086689787  | 1.9306911991  | -1.5490772004 |
| C | 4.5347491525  | 3.2315744735  | -3.7117060124 |
| O | -1.3850967264 | 4.385115578   | -1.4739770753 |
| O | -1.801340559  | 2.8443182601  | -3.0967255846 |
| C | -2.7782582007 | 4.7578987623  | -1.5063851049 |
| H | 4.5684767247  | 3.8010935674  | -4.6402422137 |
| H | 5.0762825303  | 3.7592513988  | -2.9229468685 |
| H | 4.9746375226  | 2.2420408572  | -3.8571232666 |
| H | -2.8799792664 | 5.5614397138  | -0.7769776387 |
| H | -3.0618300866 | 5.1126500136  | -2.5002517342 |
| H | -3.4129120741 | 3.9132856164  | -1.2266521491 |

#### 10a\_t1

|   |          |           |          |
|---|----------|-----------|----------|
| C | 1.296988 | 0.567029  | 1.441002 |
| N | 1.627521 | 0.287599  | 2.724018 |
| C | 2.595526 | 1.283152  | 3.216177 |
| C | 2.380847 | 2.440835  | 2.227482 |
| N | 1.802361 | 1.757015  | 1.056775 |
| H | 1.710827 | -0.673153 | 3.031663 |
| H | 3.612609 | 0.881454  | 3.156079 |
| H | 2.381548 | 1.561874  | 4.249127 |
| H | 3.311128 | 2.948202  | 1.967004 |
| H | 1.671064 | 3.178563  | 2.618272 |

|   |           |           |           |
|---|-----------|-----------|-----------|
| H | 1.267215  | 2.323688  | 0.380646  |
| N | 0.545860  | -0.223768 | 0.668740  |
| C | 0.006750  | -1.487321 | 1.239088  |
| C | -1.231054 | -1.942849 | 0.552429  |
| H | 0.757487  | -2.277805 | 1.167987  |
| H | -0.216579 | -1.303690 | 2.294112  |
| O | -2.370675 | -1.213063 | 0.767041  |
| C | -3.374296 | -1.821628 | 0.071863  |
| C | -2.905786 | -2.925667 | -0.572088 |
| C | -1.508119 | -3.004113 | -0.259474 |
| H | -0.799253 | -3.748085 | -0.595060 |
| H | -3.479285 | -3.599611 | -1.192931 |
| H | -4.346228 | -1.355536 | 0.138544  |
| C | 0.479606  | 0.004223  | -0.792061 |
| C | -0.135638 | 1.020976  | -1.396254 |
| C | 1.258040  | -1.041774 | -1.516524 |
| C | -0.763216 | 2.152626  | -0.822238 |
| O | 1.101886  | -0.987878 | -2.853979 |
| O | 1.973158  | -1.873496 | -0.972873 |
| C | 1.853464  | -1.958883 | -3.602846 |
| O | -2.123467 | 2.141669  | -0.898052 |
| O | -0.150247 | 3.159967  | -0.406189 |
| C | -2.785342 | 3.333559  | -0.448164 |
| H | -2.558085 | 3.545792  | 0.600597  |
| H | -2.502463 | 4.198910  | -1.054611 |
| H | -3.852769 | 3.137069  | -0.561680 |
| H | 1.611980  | -1.771785 | -4.649686 |
| H | 2.927173  | -1.835628 | -3.437479 |
| H | 1.562779  | -2.975997 | -3.326508 |

#### 10a\_t2

|   |               |               |               |
|---|---------------|---------------|---------------|
| C | 0.3539824618  | -0.5419705628 | 0.8141834355  |
| N | 0.4746045944  | -1.6342897088 | 1.5992758593  |
| C | 1.7591836386  | -2.3064581861 | 1.3387351929  |
| C | 2.5426087647  | -1.2447234595 | 0.540322659   |
| N | 1.5018905967  | -0.257107076  | 0.1740116286  |
| H | -0.3463074685 | -2.1988363918 | 1.7878290933  |
| H | 1.5911275527  | -3.2155033696 | 0.7536191434  |
| H | 2.2549016323  | -2.5747717722 | 2.2736090017  |
| H | 3.0069052621  | -1.6541638173 | -0.3595627166 |
| H | 3.3040266793  | -0.7555977067 | 1.149759232   |
| N | -0.7590142901 | 0.1876294008  | 0.707356795   |
| H | -0.8697692782 | 0.7345687614  | -0.1591005714 |
| C | -1.9789302363 | -0.0657514292 | 1.4898376865  |
| C | -2.8483047453 | -1.1667343283 | 0.9766063264  |
| H | -1.6917430841 | -0.2604146491 | 2.5279385079  |
| H | -2.5534317826 | 0.8618205154  | 1.4783569686  |
| O | -2.4392035796 | -2.4520459452 | 1.2493264176  |
| C | -3.3555786775 | -3.2993364085 | 0.6871815802  |
| C | -4.3365496213 | -2.5858803007 | 0.0731668003  |

|   |               |               |               |
|---|---------------|---------------|---------------|
| C | -4.0064581505 | -1.20110071   | 0.2595107243  |
| H | -4.5597071735 | -0.3416283614 | -0.0928903759 |
| H | -5.1930191485 | -2.9911480658 | -0.4471309022 |
| H | -3.1676489762 | -4.3542086825 | 0.8192388332  |
| C | 1.8192656974  | 1.036149226   | -0.4351497455 |
| C | 1.2671803547  | 1.5176105267  | -1.5534870922 |
| C | 2.7715316943  | 1.8190891286  | 0.4074858672  |
| C | 0.2112305393  | 0.9367166612  | -2.3017192786 |
| O | 3.2996656323  | 2.8797058129  | -0.235575633  |
| O | 3.0546413777  | 1.5498083655  | 1.5676727979  |
| C | 4.1863345974  | 3.6982134015  | 0.5470950157  |
| O | 0.5980001053  | 0.3954546608  | -3.4916603545 |
| O | -0.9963028947 | 1.0193528583  | -1.9931814699 |
| C | -0.4594989449 | -0.0805383484 | -4.3383923392 |
| H | 4.5175963985  | 4.4933126189  | -0.1216443744 |
| H | 3.6666882294  | 4.1252332687  | 1.4091511331  |
| H | 5.0454121546  | 3.119742885   | 0.8973074638  |
| H | 0.0337995397  | -0.4961021018 | -5.2186778089 |
| H | -1.0492112016 | -0.8574614813 | -3.843429074  |
| H | -1.1253192492 | 0.7339537711  | -4.6382674268 |

# TS2(1a\_t1)

|   |               |               |               |
|---|---------------|---------------|---------------|
| C | 1.2824862565  | 0.3106807691  | 1.7458983302  |
| N | 1.6618262592  | 0.0134395102  | 3.0150022732  |
| C | 2.5128192962  | 1.0939302111  | 3.5451986461  |
| C | 2.1298065362  | 2.2712548867  | 2.6348062002  |
| N | 1.6240071408  | 1.5788251931  | 1.440930926   |
| H | 1.8816842505  | -0.9414313864 | 3.2666052363  |
| H | 3.5704791928  | 0.8291205642  | 3.4405528564  |
| H | 2.2931116282  | 1.2833365342  | 4.5967475965  |
| H | 2.9813870536  | 2.9072489807  | 2.3882405575  |
| H | 1.3405505961  | 2.8871296232  | 3.0802426675  |
| H | 1.1632624745  | 2.0951328797  | 0.6918444282  |
| N | 0.6536750299  | -0.5339180186 | 0.9253895514  |
| C | 0.3173192133  | -1.9127203258 | 1.3607452906  |
| C | -0.9915873212 | -2.3726692851 | 0.8218872546  |
| H | 1.0957999214  | -2.6020596537 | 1.0284008758  |
| H | 0.2754774028  | -1.9266388445 | 2.4528001912  |
| O | -2.119913673  | -1.7917354664 | 1.3402346331  |
| C | -3.1900714753 | -2.3774099223 | 0.7284669344  |
| C | -2.7729343216 | -3.3202805028 | -0.1600574685 |
| C | -1.3396970666 | -3.3161430933 | -0.1002136668 |
| H | -0.655444678  | -3.9299488214 | -0.6689345926 |
| H | -3.4029400253 | -3.9408245279 | -0.7817542695 |
| H | -4.1626257723 | -2.0188758283 | 1.0314703394  |
| C | 0.3284179544  | -0.0701714743 | -0.439474124  |
| C | -0.3693383226 | 1.0269353622  | -0.6184939401 |
| C | 1.0026127082  | -0.9057556508 | -1.4772979377 |
| C | -0.7024473915 | 2.2930577675  | -1.0068812213 |
| O | 0.6192098471  | -0.577609354  | -2.7252645475 |

O 1.8132337486 -1.7903328038 -1.2405547306  
C 1.2444094625 -1.3267833665 -3.7829205918  
O -1.9990794468 2.4697146271 -1.4466193326  
O 0.0946130197 3.2619195159 -0.8994049612  
C -2.3976984902 3.8317743492 -1.6256716856  
H -2.3355467675 4.3995282303 -0.6908830703  
H -1.7901006488 4.33763486 -2.3822893386  
H -3.4370826357 3.7941696905 -1.9592264235  
H 0.8205409468 -0.9365614655 -4.7085327513  
H 2.3280792215 -1.182820456 -3.775822164  
H 1.0226538754 -2.3930263076 -3.6877689713

#### TS2(1a\_t2)

C 0.5365006327 -0.6283455867 0.8246480122  
N 0.6287957107 -1.6507327073 1.7098930756  
C 1.9815388457 -2.2336676702 1.6430004881  
C 2.7939766747 -1.1121217113 0.9697499574  
N 1.7418485246 -0.2775785512 0.3491716611  
H -0.1631953828 -2.2736934672 1.8187039577  
H 1.9672360135 -3.1471669466 1.0396161264  
H 2.3515947531 -2.4719374779 2.6413414728  
H 3.4790557439 -1.487868896 0.2069622031  
H 3.353195122 -0.51469981 1.6913697896  
N -0.611216894 -0.0286100047 0.5061190073  
H -0.5946030903 0.6455066702 -0.2571407973  
C -1.9086061784 -0.3345133824 1.1274505645  
C -2.637606114 -1.4825410659 0.5124979309  
H -1.7520129181 -0.5081085534 2.1971159819  
H -2.5227887932 0.5614197461 1.0271311227  
O -2.1589668973 -2.7388300184 0.8006301173  
C -2.9527592794 -3.6366999147 0.140205419  
C -3.923831584 -2.9832527528 -0.5518303561  
C -3.718068047 -1.5828270291 -0.3115297736  
H -4.2982209255 -0.7576426187 -0.7005714853  
H -4.6940307864 -3.4381573537 -1.1587382957  
H -2.6984134118 -4.6779524825 0.2691552841  
C 1.9464060938 0.8362521057 -0.5724198596  
C 1.1698372776 0.985041343 -1.6223663338  
C 2.9905042014 1.7930852026 -0.0921662612  
C 0.2614818054 1.437717093 -2.5358949997  
O 3.3280060743 2.692693953 -1.0356648557  
O 3.4882435583 1.7833613224 1.0246374665  
C 4.2979032101 3.6770013081 -0.6340825706  
O 0.5792570421 1.1689488505 -3.8576340997  
O -0.8186608549 1.9997218778 -2.2246792404  
C -0.4615320923 1.4477293313 -4.7968665625  
H 4.4467353538 4.3143043712 -1.5061044678  
H 3.9272528174 4.2701948131 0.2060596202  
H 5.2406207742 3.2017283019 -0.3501832727  
H -0.0612929585 1.1678167878 -5.7740728461

H -1.3637316087 0.8609023249 -4.5919735892  
H -0.7313124126 2.508497598 -4.8045645913

#### 11a\_t1

C 1.4600831831 0.2739955056 1.9413281309  
N 1.9560086834 -0.2767413769 3.0795598672  
C 2.6862180811 0.7565235159 3.8395887151  
C 2.0999016702 2.0557267513 3.2587044794  
N 1.6154698935 1.6079183358 1.9461111268  
H 2.3330763719 -1.2161594468 3.0627306062  
H 3.7612437805 0.6784395992 3.6458929234  
H 2.5071071208 0.6524922911 4.9106882701  
H 2.8467066316 2.8448461654 3.157940063  
H 1.266005304 2.4287884433 3.8636725253  
H 0.9340917413 2.1194120675 1.3680824031  
N 0.8604932217 -0.4034367055 0.9569092613  
C 0.5480674769 -1.8456566288 1.1401928717  
C -0.8374182885 -2.1893299658 0.7151757038  
H 1.2517059551 -2.4504372234 0.5672114976  
H 0.6635044578 -2.0818149911 2.1999694504  
O -1.8661281664 -1.6770445096 1.4625690414  
C -3.0280055356 -2.1465014005 0.9215000208  
C -2.7657293058 -2.9500918151 -0.1450581657  
C -1.3378555496 -2.9765008871 -0.2808632885  
H -0.7569155639 -3.5079692449 -1.0215227262  
H -3.4938112632 -3.4588928956 -0.7611279588  
H -3.9388349527 -1.8219698233 1.4024686359  
C 0.4166897463 0.2767353796 -0.2684077765  
C -0.1483783973 1.4895909488 -0.2155568324  
C 0.8298935756 -0.4862831732 -1.4835040232  
C -0.4839520677 2.2932248676 -1.3611038545  
O 0.1523606649 -0.1054036139 -2.5838697525  
O 1.7002401739 -1.3456934472 -1.5092779008  
C 0.5615261105 -0.7270566382 -3.815011137  
O -1.8168271811 2.2143047532 -1.6714977845  
O 0.2641264494 3.0914261472 -1.9234417997  
C -2.2588001908 3.0980206198 -2.7092535185  
H -2.0784018228 4.1451843365 -2.4474603761  
H -1.7584422611 2.8824090918 -3.6584240324  
H -3.3315336937 2.9234719655 -2.812239271  
H -0.0730136976 -0.2926232433 -4.5877342662  
H 1.6125973281 -0.5155211478 -4.0282303999  
H 0.4135153163 -1.8092176071 -3.770971729

#### 11a\_t2

C -0.1014425753 -0.8098368241 1.2870585361  
N 0.171954135 -1.7027489362 2.2758444823  
C 1.6077400092 -2.0270283505 2.239649117  
C 2.2016449542 -0.8164745761 1.5014685569  
N 1.0283897368 -0.259528194 0.7881304013

|   |               |               |               |
|---|---------------|---------------|---------------|
| H | -0.4877841154 | -2.4594243106 | 2.4207490942  |
| H | 1.7729486278  | -2.9602465491 | 1.6902249579  |
| H | 2.0121252376  | -2.1309951766 | 3.2476875777  |
| H | 2.9842436379  | -1.1008833228 | 0.7968680413  |
| H | 2.6037007649  | -0.0724346195 | 2.1899470858  |
| N | -1.3078062649 | -0.4839563477 | 0.8526149034  |
| H | -1.2349504183 | 0.1765205615  | 0.0124825637  |
| C | -2.5695479416 | -0.9692135235 | 1.4219793567  |
| C | -2.9708265852 | -2.3385174317 | 0.9800530007  |
| H | -2.5120564185 | -0.9301439934 | 2.5159209662  |
| H | -3.3430281513 | -0.2657403584 | 1.1089640921  |
| O | -2.3095396544 | -3.3913771175 | 1.5690774946  |
| C | -2.8070905854 | -4.5429229594 | 1.0210538528  |
| C | -3.7697933265 | -4.2478424029 | 0.1075916502  |
| C | -3.8753391062 | -2.8160353449 | 0.0797430722  |
| H | -4.5387596168 | -2.2190344422 | -0.5304803712 |
| H | -4.3389497318 | -4.9585861982 | -0.4750935632 |
| H | -2.3804044857 | -5.4642608121 | 1.3881693043  |
| C | 1.0571735795  | 0.74841209    | -0.2470832434 |
| C | -0.0547271613 | 1.0542820646  | -0.9377489668 |
| C | 2.3597529689  | 1.4778120239  | -0.3350401317 |
| C | -0.1524681121 | 2.1197287065  | -1.9057705615 |
| O | 2.5965900628  | 1.9326226296  | -1.5802608715 |
| O | 3.1150342439  | 1.6922858601  | 0.6013610706  |
| C | 3.7472210877  | 2.7862371308  | -1.7246575461 |
| O | -0.1455952876 | 1.6461301394  | -3.1908328202 |
| O | -0.3698048754 | 3.3039535197  | -1.6583043294 |
| C | -0.3707986394 | 2.6283340663  | -4.210223117  |
| H | 3.7757117021  | 3.0625095027  | -2.7787021674 |
| H | 3.6473173582  | 3.6799137941  | -1.1032253737 |
| H | 4.6611634793  | 2.2542365557  | -1.4490835718 |
| H | -0.345952271  | 2.0858226681  | -5.1572209056 |
| H | -1.3432339512 | 3.1149920775  | -4.0882791534 |
| H | 0.4093106898  | 3.3957504011  | -4.2051254841 |

### TS3(1a\_t1)

|   |               |               |              |
|---|---------------|---------------|--------------|
| C | 1.3909689297  | 0.2967786832  | 1.9362518792 |
| N | 1.8235219226  | -0.2450805441 | 3.1193781513 |
| C | 2.3334042699  | 0.8621188432  | 3.9567363239 |
| C | 1.6715740217  | 2.0990293906  | 3.3096328679 |
| N | 1.3131229891  | 1.6149074086  | 1.9712786462 |
| H | 2.3845481506  | -1.0877428085 | 3.0878937126 |
| H | 3.4258685427  | 0.9129082426  | 3.8942898108 |
| H | 2.0442353235  | 0.7245089079  | 5.0002041283 |
| H | 2.3474955288  | 2.9552884223  | 3.2561373522 |
| H | 0.768358376   | 2.4039039234  | 3.8509429424 |
| H | 0.708020638   | 1.9881577665  | 1.0440734166 |
| N | 1.0179806712  | -0.4293293883 | 0.8530389454 |
| C | 0.8034216574  | -1.8938007228 | 0.9916558351 |
| C | -0.5977830924 | -2.3126421115 | 0.6969824064 |

H 1.4754417372 -2.4259074045 0.3195522759  
H 1.0517502669 -2.1721042997 2.0157409197  
O -1.5794861746 -1.854862958 1.5374799988  
C -2.7589354238 -2.3932314071 1.1098686238  
C -2.5529854293 -3.1878130379 0.0245383916  
C -1.1451538781 -3.1331486777 -0.2464772353  
H -0.6078691669 -3.6359954273 -1.0381342292  
H -3.3058041654 -3.7404887054 -0.5198721456  
H -3.6370955061 -2.1158568983 1.6739387953  
C 0.5546262521 0.2496924734 -0.3448921076  
C 0.2213358317 1.5520198796 -0.3216324467  
C 0.7031436736 -0.5664911104 -1.5901781389  
C -0.0946694943 2.3500219918 -1.4922166249  
O -0.1998871514 -0.2222731069 -2.5255014256  
O 1.5680119255 -1.4087541801 -1.7759889102  
C -0.0305994972 -0.8384419404 -3.8165960288  
O -1.42964707 2.6100184001 -1.5812468069  
O 0.7220324672 2.8648655223 -2.2482544372  
C -1.8170014397 3.5006756308 -2.6387734079  
H -1.3381994078 4.4780187616 -2.5287906774  
H -1.5593725341 3.0880968627 -3.6185535503  
H -2.8998924465 3.6065190653 -2.5555035769  
H -0.8291807905 -0.4353249724 -4.4391769881  
H 0.9440744 -0.5854854103 -4.2413876692  
H -0.1227909073 -1.9245930642 -3.7407020167

### TS3(1a\_t2)

C -0.1174906786 -0.7726897889 1.3814228674  
N 0.1716685957 -1.664120139 2.3726283445  
C 1.6129120237 -1.961440039 2.3383192116  
C 2.1898649189 -0.7287737042 1.6230639259  
N 1.01551784 -0.200341458 0.8945622647  
H -0.4708584698 -2.4371951368 2.5033224035  
H 1.8010748557 -2.8812268663 1.7732668373  
H 2.0151097448 -2.0750235439 3.3463366108  
H 2.994047958 -0.9880258313 0.9343479011  
H 2.5602851261 0.0177221981 2.3279134477  
N -1.3094374209 -0.4506695443 0.9249137813  
H -1.1652923439 0.2940493251 0.0565881509  
C -2.5634525109 -0.9934691347 1.4538863349  
C -2.9357099266 -2.3364409807 0.9146269595  
H -2.5175330643 -1.0284363984 2.5496976581  
H -3.3537139855 -0.2892901766 1.1846711612  
O -2.2119328103 -3.4092245676 1.379997332  
C -2.6973239083 -4.5284476421 0.7591775992  
C -3.712037127 -4.1942429947 -0.0816456429  
C -3.8658441575 -2.7698108182 0.0176696864  
H -4.5761867615 -2.1483972607 -0.5097849658  
H -4.2836530502 -4.8742329866 -0.6977443877  
H -2.2222754355 -5.4608144457 1.0252665615

C 1.0115628025 0.800017173 -0.1371980374  
C -0.1422686314 1.1276039478 -0.7501642407  
C 2.3269827352 1.4815795746 -0.3406453655  
C -0.2837724389 2.1145007803 -1.8008989772  
O 2.4659682955 1.9320283205 -1.6005037454  
O 3.1701105216 1.6583356684 0.5248102651  
C 3.6384903839 2.7297681223 -1.85482288  
O -0.3264224924 3.3920329817 -1.3122490704  
O -0.484513958 1.8689793502 -2.9851022197  
C -0.6141510473 4.4126875204 -2.2801364487  
H 3.5778627222 3.0097068994 -2.9064185806  
H 3.6429402806 3.6231163797 -1.2252695303  
H 4.5465002428 2.1508742662 -1.6694477601  
H -0.6408886883 5.3511833263 -1.7237043697  
H 0.1626240963 4.460013907 -3.0490215438  
H -1.5799522362 4.239921717 -2.764009539

## 12a\_t1

C 1.0069565394 0.1888632048 1.8353362512  
N 1.8055696703 -0.5215503062 2.7239442252  
C 2.7547359256 0.4659096878 3.2786861107  
C 2.0794435123 1.8104322387 2.892872754  
N 1.0582267804 1.4784062564 1.8841025389  
H 2.2194283018 -1.3784656322 2.372444639  
H 3.7402607298 0.3559276242 2.8112394002  
H 2.8689211782 0.3400331879 4.3585724815  
H 2.8003695519 2.5364779288 2.5013401009  
H 1.5960452696 2.2750436227 3.7627544197  
N 0.1454292935 -0.4838666035 0.9810597698  
C -0.0639946682 -1.9450405076 1.0976987705  
C 0.9079168669 -2.7569230284 0.3063891446  
H -1.0883673456 -2.1574920946 0.7960409384  
H 0.0201433549 -2.217823668 2.1505552958  
O 0.7846772686 -2.7168904753 -1.0575715965  
C 1.7555158759 -3.5257744088 -1.5754810975  
C 2.48795126 -4.0879715528 -0.5761633368  
C 1.9359090937 -3.5874821432 0.6506543743  
H 2.255068833 -3.8202779824 1.6575585067  
H 3.315699109 -4.7734684195 -0.692994707  
H 1.7892920669 -3.5948122924 -2.6526867102  
C -0.3851474181 0.2483308641 -0.0885854885  
C -1.677640553 0.270878698 -0.4880936077  
C 0.6438637616 0.9635999374 -0.9443577815  
C -2.8380648881 -0.2791792107 0.2325578295  
O 0.1417882383 2.0622054831 -1.5253346273  
O 1.7696645155 0.5467616346 -1.1249712926  
C 1.0275897583 2.7479959863 -2.4366610581  
O -3.967254744 -0.029508423 -0.4661220386  
O -2.8369679304 -0.8493759215 1.3130367685  
C -5.1938017818 -0.4727303723 0.1461180191



H -5.1775353387 -1.5541533474 0.3033419372  
H -5.3511116521 0.0302285409 1.1036562166  
H -5.9843768108 -0.2046384189 -0.5545371656  
H 0.4610075127 3.6022379928 -2.8059709881  
H 1.9251806131 3.0844417252 -1.9128303172  
H 1.3099024809 2.092471926 -3.2638502338  
H -1.9085183624 0.8001982691 -1.4036114451

#### E-12a\_t1

C 1.012141576 0.4511045169 2.1184954934  
N 1.8740966592 -0.152153206 3.0371563293  
C 2.1966865142 0.8887461592 4.0325815413  
C 1.0947062036 1.9426359593 3.7556499453  
N 0.5164324657 1.5926476749 2.4464499976  
H 2.6722160864 -0.6411480199 2.6446659309  
H 3.2006191771 1.2912644292 3.8554723928  
H 2.1581673206 0.4886317508 5.0489568583  
H 1.4845335481 2.9655290283 3.7486545953  
H 0.3029952809 1.9022337574 4.5146045962  
N 0.7238785979 -0.249019308 0.9333275952  
C 0.8715305642 -1.7328809879 0.9622593395  
C -0.3713834085 -2.4777958108 0.6071655784  
H 1.674763804 -2.0500048468 0.2949627911  
H 1.1614539071 -1.98910712 1.980931568  
O -1.5101455264 -2.1728658704 1.3039500226  
C -2.4820421946 -3.0348438164 0.8817138096  
C -1.9857037543 -3.8880899381 -0.0548938449  
C -0.6095468471 -3.5244734874 -0.2354327367  
H 0.1087639957 -3.9787045649 -0.9035273509  
H -2.5293664716 -4.6734522507 -0.5611477988  
H -3.4549101079 -2.9070928975 1.3325994905  
C 0.3320018819 0.3907361024 -0.2397035684  
C -0.0595045636 1.6878290382 -0.3485394138  
C 0.453633715 -0.4541932337 -1.4996469203  
C -0.2435431199 2.3554194092 -1.6400165168  
O -0.7370828123 -0.6550765437 -2.0650156521  
O 1.5090174523 -0.8969441475 -1.9061771687  
C -0.7216378197 -1.3541611286 -3.3266612172  
O -0.8566313998 3.551430736 -1.4616624224  
O 0.1118144566 1.9575999631 -2.7415369097  
C -1.0589285056 4.3324661488 -2.6522273379  
H -0.1045171198 4.5652799556 -3.1322849929  
H -1.6978287533 3.8015978907 -3.3628935357  
H -1.5468795191 5.2502640933 -2.3230096235  
H -1.7661987021 -1.443273118 -3.6232259191  
H -0.1639757942 -0.7753690542 -4.0662929804  
H -0.2726506866 -2.3433375888 -3.2149188551  
H -0.1911470998 2.2813443262 0.5429378899

#### 12a\_t2

|   |               |               |               |
|---|---------------|---------------|---------------|
| C | 0.814686568   | 0.7614530555  | 0.5927385333  |
| N | 1.7086439656  | 1.7931250533  | 0.3887720687  |
| C | 0.9986203891  | 3.019045329   | 0.0041431992  |
| C | -0.3083732536 | 2.47916191    | -0.5913801495 |
| N | -0.4173915718 | 1.1513046581  | 0.0427109029  |
| H | 1.5698027176  | 3.5985770585  | -0.7246438392 |
| H | 0.8028418911  | 3.6504038962  | 0.8791889851  |
| H | -0.239861685  | 2.3522607672  | -1.6777722793 |
| H | -1.1645073267 | 3.1051833978  | -0.3478978957 |
| N | 0.9626945914  | -0.3874576828 | 1.1468040883  |
| C | 2.2991801545  | -0.7501086115 | 1.6301117325  |
| C | 2.6054163805  | -0.2477605123 | 3.0077420187  |
| H | 3.1017357409  | -0.3912517465 | 0.9701232104  |
| H | 2.3566617704  | -1.8455023585 | 1.6316834151  |
| O | 1.8174304388  | -0.7084347168 | 4.0308393465  |
| C | 2.2685240578  | -0.1303698578 | 5.1842099884  |
| C | 3.3256287856  | 0.6849384209  | 4.9238232487  |
| C | 3.5448375445  | 0.6094968546  | 3.5061600132  |
| H | 4.3068132119  | 1.1189818701  | 2.9319931016  |
| H | 3.8815165838  | 1.2671821395  | 5.6457055138  |
| H | 1.738849234   | -0.3984120486 | 6.0864144193  |
| C | -1.4164881073 | 0.2328316463  | -0.2207663072 |
| C | -2.7525404767 | 0.4714419426  | -0.2457592645 |
| C | -0.959706707  | -1.1317926475 | -0.709674562  |
| C | -3.4498691851 | 1.6811938056  | 0.2055097364  |
| O | -0.1561501873 | -1.2727437446 | -1.6088589027 |
| O | -1.6346829242 | -2.1287374579 | -0.1249260974 |
| O | -4.7737481493 | 1.5727598261  | -0.0569731484 |
| O | -2.9675155669 | 2.6490958868  | 0.7770426203  |
| C | -5.5917772429 | 2.6705286656  | 0.3874488771  |
| H | -6.6084372457 | 2.4207056406  | 0.0835661952  |
| H | -5.5390903205 | 2.7784638348  | 1.4740246675  |
| H | -5.2759571793 | 3.6050409309  | -0.0834127745 |
| H | -3.394210922  | -0.3324546033 | -0.5851039906 |
| C | -1.3356144809 | -3.4547053214 | -0.6139163325 |
| H | -1.5709450246 | -3.5342030629 | -1.677809439  |
| H | -0.2808287315 | -3.6893474633 | -0.4529505815 |
| H | -1.9661357191 | -4.1282666258 | -0.0344055676 |
| H | 2.4521129815  | 1.8877308718  | 1.0695192493  |

#### **E-12a\_t2**

|   |               |               |              |
|---|---------------|---------------|--------------|
| C | -0.4117845793 | -0.7447301206 | 1.3444665296 |
| N | 0.1620426338  | -1.6596976056 | 2.2118674537 |
| C | 1.6095821754  | -1.7320258277 | 2.007425966  |
| C | 1.9161186527  | -0.3413419895 | 1.4538460143 |
| N | 0.6380618185  | 0.0363731682  | 0.8087306163 |
| H | -0.3297692281 | -2.5393826416 | 2.3120909287 |
| H | 1.8731350315  | -2.5145910519 | 1.285098109  |
| H | 2.1373893342  | -1.9229634337 | 2.9440407538 |
| H | 2.7306753787  | -0.3588707125 | 0.7290389345 |

|   |               |               |               |
|---|---------------|---------------|---------------|
| H | 2.1563966071  | 0.367082496   | 2.2523455471  |
| N | -1.6501259531 | -0.5562980853 | 1.0635770259  |
| H | -1.5233851366 | 1.007170861   | -0.4662011236 |
| C | -2.6462737952 | -1.3972391729 | 1.7423865518  |
| C | -2.8933298395 | -2.7159003092 | 1.0797796882  |
| H | -2.3853643596 | -1.5672567231 | 2.7983044676  |
| H | -3.5950131098 | -0.8529841731 | 1.7336066775  |
| O | -1.946232833  | -3.6959996482 | 1.2716140304  |
| C | -2.3482023429 | -4.7987902624 | 0.5669064154  |
| C | -3.5257129237 | -4.5465126023 | -0.0638478337 |
| C | -3.8786822199 | -3.1941564601 | 0.2675335492  |
| H | -4.7535169544 | -2.6473234818 | -0.0561493963 |
| H | -4.0788179414 | -5.2354643923 | -0.6870696465 |
| H | -1.6997783885 | -5.6601728485 | 0.6247976717  |
| C | 0.5320754508  | 1.1217089832  | -0.0387143488 |
| C | -0.6072494119 | 1.54841824    | -0.6481737903 |
| C | 1.8589735164  | 1.8410864938  | -0.2282096872 |
| C | -0.7414879633 | 2.6920034605  | -1.5478197644 |
| O | 2.4583004199  | 1.4597352631  | -1.3588601853 |
| O | 2.3233459773  | 2.6053938566  | 0.5905464112  |
| C | 3.7280339159  | 2.0931495798  | -1.6422708752 |
| O | 0.3635123974  | 3.4729652725  | -1.643242485  |
| O | -1.7733359095 | 2.9436694334  | -2.1559752882 |
| C | 0.2628159902  | 4.5992238955  | -2.5323151886 |
| H | 4.0680548498  | 1.6546054881  | -2.5795967592 |
| H | 3.5944927189  | 3.1714291197  | -1.7521184899 |
| H | 4.4440484732  | 1.8889134036  | -0.8433214373 |
| H | 1.2228716524  | 5.1117794284  | -2.4689257677 |
| H | 0.0790683122  | 4.2699189572  | -3.5583808047 |
| H | -0.542117417  | 5.2688861417  | -2.2190894697 |

#### TS4<sub>sc</sub>(1a\_t1)

|   |               |               |               |
|---|---------------|---------------|---------------|
| C | 1.4052179191  | -0.1701762376 | 1.4064779512  |
| N | 2.1385876886  | -0.8322449764 | 2.3069922595  |
| C | 3.3117992145  | 0.0049806146  | 2.6336589859  |
| C | 3.3531606391  | 0.957202725   | 1.4106783819  |
| N | 1.954704564   | 0.9411449261  | 0.9549018379  |
| H | 4.20855133    | -0.6085560187 | 2.7313601741  |
| H | 3.1423646162  | 0.5504558492  | 3.5683681387  |
| H | 3.9992667908  | 0.5657067081  | 0.6162439655  |
| H | 3.6790671328  | 1.9631140901  | 1.6788166302  |
| N | 0.2351613155  | -0.5295379556 | 0.8000873318  |
| C | -0.4952035172 | -1.7696840397 | 1.1509978559  |
| C | -0.1837750253 | -2.9159243562 | 0.2521841444  |
| H | -1.5592252751 | -1.5505287416 | 1.0838953561  |
| H | -0.2562867631 | -2.0061985668 | 2.1909598596  |
| O | 1.0422308889  | -3.5166200442 | 0.3874873457  |
| C | 1.0982614416  | -4.5252807298 | -0.5309150273 |
| C | -0.0601480146 | -4.5849447723 | -1.2429992006 |
| C | -0.8945092427 | -3.5348704828 | -0.7343466767 |

|   |               |               |               |
|---|---------------|---------------|---------------|
| H | -1.8923090192 | -3.2707730808 | -1.0548192964 |
| H | -0.2939093344 | -5.2862849499 | -2.0317320613 |
| H | 2.0130955626  | -5.0989966538 | -0.5480738994 |
| C | 0.0123928775  | 0.3251912498  | -0.2826488694 |
| C | -1.0698015416 | 0.5342782223  | -1.0629082581 |
| C | 1.3144214724  | 1.1702843745  | -0.5809924238 |
| C | -2.4262373905 | -0.0093656117 | -1.0108645372 |
| O | 1.1992217391  | 2.3448623673  | -0.9775139349 |
| O | 2.187936673   | 0.2650305698  | -1.3266971242 |
| O | -3.1070935347 | 0.3600392545  | -2.1230197461 |
| O | -2.9534353249 | -0.6707828087 | -0.1221582301 |
| C | -4.4798641418 | -0.064086783  | -2.1898574634 |
| H | -4.5511945325 | -1.1550390875 | -2.1876845402 |
| H | -5.0527048457 | 0.3352542572  | -1.3488203353 |
| H | -4.8644090539 | 0.3344506467  | -3.1290124574 |
| H | -0.902437594  | 1.2716133153  | -1.8412446273 |
| C | 2.6547119624  | 0.7941777178  | -2.5599192523 |
| H | 3.3487565386  | 0.0510606306  | -2.9641861329 |
| H | 1.8430440145  | 0.9470108226  | -3.2841543393 |
| H | 3.1804809754  | 1.7461798217  | -2.4326146312 |
| H | 1.7819957947  | -1.5523682657 | 2.9207598464  |

#### TS4<sub>sc</sub>(1a\_t2)

|   |               |               |               |
|---|---------------|---------------|---------------|
| C | 0.8725676343  | 1.2374215116  | 0.4994801252  |
| N | 1.8009972519  | 2.1645175265  | 0.7705741927  |
| C | 1.3019900815  | 3.5046543922  | 0.412994823   |
| C | -0.2262771344 | 3.2939576604  | 0.3565540948  |
| N | -0.3267040311 | 1.8369428756  | 0.13864852    |
| H | 1.7038667574  | 3.8156048905  | -0.556800926  |
| H | 1.5853834478  | 4.2373330769  | 1.1698705076  |
| H | -0.7079046375 | 3.8429006303  | -0.4469380741 |
| H | -0.7065290984 | 3.5544106562  | 1.3051872206  |
| N | 0.8222524315  | -0.0530526567 | 0.5595729109  |
| C | 1.8161839902  | -0.9701983687 | 1.091054025   |
| C | 2.9165737404  | -1.2991877649 | 0.1383265082  |
| H | 2.2360358276  | -0.5670610326 | 2.0215793913  |
| H | 1.2689501663  | -1.8831072661 | 1.3450361702  |
| O | 3.8266090231  | -0.2988597531 | -0.1054918104 |
| C | 4.7402561192  | -0.7906846615 | -0.9972031077 |
| C | 4.4374535989  | -2.0767364785 | -1.3191266228 |
| C | 3.2498529035  | -2.4068898866 | -0.5819575075 |
| H | 2.7139466102  | -3.345847063  | -0.5867620363 |
| H | 4.9879521431  | -2.7148625965 | -1.9962748456 |
| H | 5.5275262863  | -0.1126123886 | -1.2908931077 |
| C | -1.3612841084 | 0.9348958665  | 0.121139002   |
| C | -2.6995840401 | 1.1132106809  | 0.0025055117  |
| C | -0.7962534843 | -0.5270667196 | 0.284818589   |
| C | -3.4255577616 | 2.3405276609  | -0.2991612709 |
| O | -0.6615778554 | -1.0638727412 | -1.0477517138 |
| O | -1.251303738  | -1.2575845424 | 1.1879957075  |

O -4.7617775057 2.1457404519 -0.1386493635  
O -2.9685356587 3.411921579 -0.680628472  
C -5.5979292067 3.2711308405 -0.4524252248  
H -6.6213559232 2.9349074847 -0.2825751464  
H -5.3708156546 4.1209223099 0.1972268134  
H -5.471360424 3.5748813274 -1.4952168344  
H -3.3018969683 0.2205111054 0.1274868983  
H 2.787286015 1.9382947941 0.7739378121  
C -1.402121852 -2.2558146515 -1.2830195826  
H -2.4860277485 -2.0752305628 -1.3100499839  
H -1.0867534963 -2.6201493739 -2.2650274626  
H -1.1997197013 -3.0231828132 -0.5300727305

#### TS4<sub>6c</sub>(1a\_t1)

C 0.8874830869 0.2961590419 2.1322438096  
N 1.3663662653 -0.1480673424 3.335002299  
C 1.4010643256 1.0121109574 4.2493632732  
C 0.4252435525 1.9892106081 3.5641211646  
N 0.3944829813 1.5172993911 2.1722046556  
H 2.4138250908 1.4266688781 4.297128761  
H 1.0868759809 0.7253038546 5.254643832  
H 0.7602937894 3.0264216185 3.6233584044  
H -0.5856468609 1.9190602947 3.9813250026  
N 0.8656212502 -0.4568917458 1.001136512  
C 1.120884049 -1.9222044448 1.0578315448  
C -0.0500844348 -2.7359970072 0.6227694435  
H 1.9736565123 -2.1648600019 0.4260226511  
H 1.3730034865 -2.1700069853 2.0888011829  
O -1.1648022054 -2.706450895 1.4204343507  
C -2.0870868938 -3.5372554277 0.8532083563  
C -1.5868857725 -4.100264178 -0.2803282724  
C -0.2605333423 -3.5757121988 -0.4326422748  
H 0.4454421136 -3.7904783996 -1.2223070102  
H -2.0964448073 -4.7974165403 -0.9305943984  
H -3.0329302401 -3.6158502215 1.3685575688  
C 0.3116329457 0.1303465592 -0.1713258607  
C -0.4349331614 1.2490007419 -0.1345021003  
C 0.7642121001 -0.4452802308 -1.4717334164  
C -0.9011965387 1.9389915014 1.1325369294  
O -0.1012671728 -0.1844595783 -2.4647383984  
O 1.8125683146 -1.0483088392 -1.6308527173  
C 0.3126517894 -0.6007816192 -3.7829545806  
O -0.6556094856 3.3382088264 0.9325866276  
O -2.0052428829 1.5787439727 1.6149136951  
C -1.5318382437 4.2091794041 1.6373420738  
H -1.2975842889 4.2674959767 2.7092822255  
H -1.3928017705 5.2022868277 1.1997356034  
H -2.5772451007 3.9037009795 1.5310327704  
H -0.490504649 -0.2898930574 -4.4505266862  
H 1.2498314637 -0.1148002841 -4.0645380674

|   |               |               |               |
|---|---------------|---------------|---------------|
| H | 0.4374975772  | -1.6854340814 | -3.8197862043 |
| H | -0.7865737614 | 1.6708533771  | -1.0684919184 |
| H | 2.1698419374  | -0.7658817325 | 3.3427491685  |

#### TS4<sub>6c</sub>(1a\_t2)

|   |               |               |               |
|---|---------------|---------------|---------------|
| C | 0.2368019703  | -0.5665769531 | 1.1471069737  |
| N | 0.2084885607  | -1.4469113083 | 2.1888637851  |
| C | 1.5748339741  | -1.8994824234 | 2.4841365077  |
| C | 2.4247357534  | -0.7585201332 | 1.9116864456  |
| N | 1.5275055931  | -0.2020664811 | 0.8706320604  |
| H | 1.7876121004  | -2.8483175414 | 1.9786187696  |
| H | 1.7242735774  | -2.0256604806 | 3.5576750411  |
| H | 3.3577771247  | -1.1037257951 | 1.4768425391  |
| H | 2.6387584903  | 0.0070555484  | 2.6657570028  |
| N | -0.7906121157 | -0.0643218639 | 0.5156213631  |
| C | -2.1654339993 | -0.3588431565 | 0.9252154731  |
| C | -2.7228745506 | -1.6359940478 | 0.391867272   |
| H | -2.2369692104 | -0.3473485466 | 2.0200029656  |
| H | -2.7527144167 | 0.4815775953  | 0.5443476874  |
| O | -2.2869734241 | -2.7963648328 | 0.9902937978  |
| C | -2.9132366018 | -3.8402216117 | 0.3641470278  |
| C | -3.7391554182 | -3.3730140835 | -0.6093959021 |
| C | -3.6148430144 | -1.9424071964 | -0.5921051299 |
| H | -4.1235138262 | -1.2327091556 | -1.2294738689 |
| H | -4.3626511185 | -3.9695128793 | -1.2607570148 |
| H | -2.6680909529 | -4.8268018402 | 0.7277355857  |
| C | 1.7785214811  | 0.9278872981  | 0.0655534065  |
| C | 0.7936607306  | 1.5398478518  | -0.6200366511 |
| C | 3.2033376657  | 1.3401504681  | -0.0962114414 |
| C | -0.6699203242 | 1.1632989805  | -0.6604089492 |
| O | 3.3117552707  | 2.6019416439  | -0.5438201045 |
| O | 4.1637610748  | 0.6212972691  | 0.1216270008  |
| C | 4.653252153   | 3.0523342997  | -0.8276952994 |
| O | -0.8474973383 | 0.343058156   | -1.8536066356 |
| O | -1.5123036775 | 2.0689590082  | -0.4396966465 |
| C | -1.7467909926 | 0.880757839   | -2.8136738562 |
| H | 4.5450141718  | 4.075526313   | -1.186233679  |
| H | 5.2642095861  | 3.0302404496  | 0.0776062978  |
| H | 5.1149061677  | 2.427434506   | -1.5958859107 |
| H | -1.923583637  | 0.0889398014  | -3.5482179374 |
| H | -2.6997413622 | 1.1830143467  | -2.3700382209 |
| H | -1.3251013656 | 1.7516241633  | -3.3378029709 |
| H | 1.0500454062  | 2.3908413104  | -1.2391255709 |
| H | -0.5468405062 | -2.1218475179 | 2.2220587869  |

#### 13a\_t1

|   |              |               |              |
|---|--------------|---------------|--------------|
| C | 1.4304025422 | -0.2002710165 | 1.4805007565 |
| N | 2.1467790369 | -0.8513704454 | 2.3956214832 |
| C | 3.3230138333 | -0.019134995  | 2.7321420098 |
| C | 3.3879275439 | 0.9365656716  | 1.5123370692 |

|   |               |               |               |
|---|---------------|---------------|---------------|
| N | 1.9967220547  | 0.9118869802  | 1.037103099   |
| H | 4.2147265238  | -0.6382872791 | 2.8373603935  |
| H | 3.1460955416  | 0.5242419846  | 3.6660691835  |
| H | 4.0492990722  | 0.5534078378  | 0.7282478833  |
| H | 3.6998075     | 1.9437582041  | 1.7913994918  |
| N | 0.2667759251  | -0.5333722276 | 0.8564898305  |
| C | -0.4748863316 | -1.7788080808 | 1.1633017027  |
| C | -0.1329483953 | -2.9088731946 | 0.255177192   |
| H | -1.5354671692 | -1.5566335367 | 1.0642112642  |
| H | -0.2671493101 | -2.0312615914 | 2.2061775139  |
| O | 1.0848478512  | -3.5167042921 | 0.4283259117  |
| C | 1.1755849877  | -4.5071101273 | -0.5069415178 |
| C | 0.0474384717  | -4.5475502058 | -1.267352594  |
| C | -0.8040529415 | -3.5046444427 | -0.7724952465 |
| H | -1.7864922175 | -3.2295054846 | -1.1288866663 |
| H | -0.1558822585 | -5.2321182901 | -2.0789170085 |
| H | 2.088504497   | -5.0840629854 | -0.4974984088 |
| C | 0.0709876788  | 0.3659555818  | -0.1993705741 |
| C | -0.9848327659 | 0.6063363772  | -1.0056492587 |
| C | 1.3940335388  | 1.2166877472  | -0.4000420197 |
| C | -2.3322598752 | 0.0392409121  | -1.0426106757 |
| O | 1.2975056064  | 2.4098809839  | -0.7655812518 |
| O | 2.2857020085  | 0.3238403631  | -1.1963809234 |
| O | -2.9781210111 | 0.4717534369  | -2.1528279202 |
| O | -2.8795637629 | -0.6908565929 | -0.2223559719 |
| C | -4.3382223676 | 0.0282108283  | -2.3018144325 |
| H | -4.3865771218 | -1.0614009879 | -2.3767730042 |
| H | -4.950494895  | 0.3580917204  | -1.4584277237 |
| H | -4.695477822  | 0.4833797336  | -3.2258971143 |
| H | -0.7972796947 | 1.3951407691  | -1.7271361116 |
| C | 2.2501262306  | 0.5902448804  | -2.5868677964 |
| H | 3.097576767   | 0.0626312614  | -3.0371197815 |
| H | 1.3262925301  | 0.2221365248  | -3.0606536003 |
| H | 2.3411307758  | 1.6624512384  | -2.7916737744 |
| H | 1.7856914225  | -1.5787662607 | 2.9990805916  |

### 13a\_t2

|   |               |               |               |
|---|---------------|---------------|---------------|
| C | 0.9503841481  | 0.6457617411  | 0.5505232512  |
| N | 1.8832248643  | 1.5761735842  | 0.769505064   |
| C | 1.3799830574  | 2.9028069487  | 0.3655118597  |
| C | -0.149553506  | 2.6886597028  | 0.3224328802  |
| N | -0.2481273186 | 1.2225624789  | 0.169751485   |
| H | 1.7792921218  | 3.1774401526  | -0.615949582  |
| H | 1.6660067944  | 3.6617312329  | 1.0948344211  |
| H | -0.6322233331 | 3.2007132962  | -0.5045531251 |
| H | -0.627718609  | 2.991460575   | 1.2590870606  |
| N | 0.8940144656  | -0.6449791537 | 0.6783167366  |
| C | 1.8953922284  | -1.5501032841 | 1.221486438   |
| C | 2.9989528106  | -1.8847125895 | 0.275321148   |
| H | 2.3090811949  | -1.1289376045 | 2.1460374605  |

|   |               |               |               |
|---|---------------|---------------|---------------|
| H | 1.3463157303  | -2.4583681065 | 1.4857996996  |
| O | 3.9190591779  | -0.8908483487 | 0.0407563178  |
| C | 4.8334892566  | -1.3869452903 | -0.8477476691 |
| C | 4.5214020838  | -2.6690411667 | -1.1766069855 |
| C | 3.32686268    | -2.991962176  | -0.4478989573 |
| H | 2.7823954141  | -3.9258898988 | -0.4600630014 |
| H | 5.0704808522  | -3.3093398734 | -1.8528301897 |
| H | 5.6284842867  | -0.7146744257 | -1.1338360362 |
| C | -1.2706401189 | 0.3017663745  | 0.21259732    |
| C | -2.6138038139 | 0.4540016447  | 0.1289333913  |
| C | -0.6429691745 | -1.1319021562 | 0.4024174493  |
| C | -3.3629312466 | 1.6622659963  | -0.1953701504 |
| O | -0.4513100138 | -1.6726338814 | -0.947045226  |
| O | -1.1131912104 | -1.8933808088 | 1.2789257262  |
| O | -4.6912702827 | 1.4611401749  | 0.0110601527  |
| O | -2.9263854141 | 2.7231161359  | -0.6264090677 |
| C | -5.5475551486 | 2.5682546435  | -0.3140175698 |
| H | -6.5616133994 | 2.2305047466  | -0.0974879317 |
| H | -5.305882393  | 3.4424777416  | 0.296715566   |
| H | -5.4588673919 | 2.8349977989  | -1.3707420613 |
| H | -3.1962051596 | -0.4409200252 | 0.3150926964  |
| H | 2.8691905206  | 1.3497662661  | 0.794538168   |
| C | -1.493525038  | -2.5384025599 | -1.3699627936 |
| H | -2.4008984495 | -1.9874472384 | -1.6614095474 |
| H | -1.1236081469 | -3.0769142722 | -2.2482907224 |
| H | -1.7567955195 | -3.2593393752 | -0.5891496755 |

#### 14a\_t1

|   |               |               |               |
|---|---------------|---------------|---------------|
| C | 0.9423320182  | 0.2332475662  | 2.21397464    |
| N | 1.468592902   | -0.2330782162 | 3.3803715594  |
| C | 1.4973838189  | 0.8847252004  | 4.3465901355  |
| C | 0.4746958898  | 1.8627708058  | 3.7423811308  |
| N | 0.4247353458  | 1.4493486025  | 2.3312340278  |
| H | 2.4996313716  | 1.3243093247  | 4.3834155717  |
| H | 1.2220938868  | 0.5408326228  | 5.3450060258  |
| H | 0.7791311353  | 2.9056870924  | 3.8316238035  |
| H | -0.5241007287 | 1.7416827039  | 4.1739050636  |
| N | 0.897324703   | -0.4648085129 | 1.0563651678  |
| C | 1.1736631362  | -1.9284344118 | 1.0408952682  |
| C | -0.0083615299 | -2.741305977  | 0.6353649058  |
| H | 1.9939888774  | -2.1290627039 | 0.3544073931  |
| H | 1.4841112034  | -2.2143729035 | 2.0457783994  |
| O | -1.0696293808 | -2.7798154691 | 1.5028047919  |
| C | -2.0109728149 | -3.5985645144 | 0.9500399943  |
| C | -1.5747046387 | -4.0880562291 | -0.242602824  |
| C | -0.27111426   | -3.5269281121 | -0.449580196  |
| H | 0.3858832341  | -3.6818413137 | -1.2935252137 |
| H | -2.11221478   | -4.7600275978 | -0.8968676855 |
| H | -2.9194885056 | -3.7265387638 | 1.5197643905  |
| C | 0.2858714531  | 0.1695131703  | -0.0689688806 |



C -0.4495758872 1.2864647948 0.0780666168  
C 0.6669693486 -0.3478812528 -1.4113338036  
C -0.780776422 1.9063952633 1.42582233  
O -0.2344368236 -0.0124653999 -2.3499311878  
O 1.6908449145 -0.9674670086 -1.6511094938  
C 0.1084437443 -0.3707101067 -3.7046492294  
O -0.4443041941 3.3405870756 1.337814214  
O -1.9238431672 1.6094306022 1.8937538897  
C -1.5534528687 4.1496045698 0.9904505533  
H -2.4191590271 3.9491731066 1.63065211  
H -1.2407542662 5.1912426955 1.1179133713  
H -1.8643204253 4.0134133396 -0.0584959721  
H -0.7154632604 -0.0071261614 -4.3182264434  
H 1.0443949586 0.106238106 -4.0053320318  
H 0.2029480387 -1.4547639575 -3.8016902726  
H -0.8667663041 1.760946535 -0.8017792507  
H 2.273670304 -0.847619565 3.3487061309

#### 14a\_t2

C 0.1156040954 -0.4090983661 1.0278422923  
N 0.0650414549 -1.2728269992 2.0790157513  
C 1.4275264575 -1.7003016392 2.4269654708  
C 2.277775274 -0.5556993752 1.8625045213  
N 1.4054078525 -0.0348685555 0.7828041244  
H 1.6695846105 -2.6542873391 1.9450805544  
H 1.5415810169 -1.8056685414 3.5069244282  
H 3.2298822344 -0.8911281743 1.4628818455  
H 2.4525892326 0.2281223419 2.6079776811  
N -0.9087402359 0.0654036088 0.3592883972  
C -2.2878309058 -0.2692720908 0.7416406242  
C -2.7790950514 -1.5848328744 0.2399968767  
H -2.3883430566 -0.2268025106 1.8327717031  
H -2.8925237448 0.5393396178 0.3256403584  
O -2.3947975458 -2.6980718426 0.9543090966  
C -2.9446407683 -3.7896259802 0.3383835027  
C -3.672271342 -3.3988780896 -0.7416334323  
C -3.5635228167 -1.9687819427 -0.8061420579  
H -4.0110529356 -1.3098531049 -1.5367780227  
H -4.2224339129 -4.0455605956 -1.4108777386  
H -2.7295143191 -4.7466786461 0.7894099567  
C 1.6678003671 1.0712421589 -0.0538158865  
C 0.6729295372 1.6761769953 -0.7295398121  
C 3.0959723103 1.4411119217 -0.2582318644  
C -0.8000821271 1.3367545242 -0.665929285  
O 3.2235926454 2.6731719627 -0.7788813316  
O 4.0449665726 0.7162198238 -0.0100545045  
C 4.5702251734 3.0806395248 -1.0992953608  
O -1.1249672115 0.6195059233 -1.9124561421  
O -1.5757791387 2.275966284 -0.3292458177  
C -1.6920424358 1.4508607339 -2.9132610396

|   |               |               |               |
|---|---------------|---------------|---------------|
| H | 4.4779705776  | 4.0833228741  | -1.5156626281 |
| H | 5.1891874819  | 3.0991216079  | -0.1993175796 |
| H | 5.0132289626  | 2.4039278062  | -1.8338708623 |
| H | -2.0706284432 | 0.7886694501  | -3.6986903924 |
| H | -2.5157899871 | 2.055217088   | -2.5201491086 |
| H | -0.9517459879 | 2.1293369434  | -3.3665529463 |
| H | 0.9191368451  | 2.50009937    | -1.3874150811 |
| H | -0.6882387357 | -1.9500108933 | 2.1157537095  |

### 15a\_t1

|   |               |               |               |
|---|---------------|---------------|---------------|
| C | 1.6296645001  | -0.6259157167 | 1.3098357307  |
| N | 2.3607694057  | -1.4205270208 | 1.9957364746  |
| C | 3.5977091396  | -0.6319861815 | 2.2463943792  |
| C | 3.5570934328  | 0.5725324606  | 1.2559934012  |
| N | 2.106925859   | 0.6376615123  | 1.0126561535  |
| H | 4.4847276705  | -1.2536496419 | 2.0978483591  |
| H | 3.6059657257  | -0.2827352671 | 3.2868086318  |
| H | 4.098673293   | 0.3584642839  | 0.328222103   |
| H | 3.9359352895  | 1.4988216602  | 1.692012963   |
| N | 0.3851381822  | -0.8062732413 | 0.7183132558  |
| C | -0.4811012254 | -1.9286088407 | 1.1257273991  |
| C | -1.4318149395 | -1.5902780524 | 2.2264658622  |
| H | -1.0506287063 | -2.2502951568 | 0.257448405   |
| H | 0.1967301995  | -2.7270278756 | 1.4377558392  |
| O | -0.9096328626 | -1.4498215721 | 3.4878282982  |
| C | -1.9479872048 | -1.1594870934 | 4.3244418307  |
| C | -3.1185500601 | -1.1173058876 | 3.6314838929  |
| C | -2.7822851413 | -1.3958059775 | 2.2650197486  |
| H | -3.4492089124 | -1.4456806314 | 1.4169580609  |
| H | -4.0991318424 | -0.9132731741 | 4.0385625892  |
| H | -1.6924411693 | -1.0167047746 | 5.3640612221  |
| C | 0.1019612597  | 0.274357856   | -0.0954826589 |
| C | -0.985206551  | 0.6449849781  | -0.8186133097 |
| C | 1.3899137636  | 1.1484055743  | -0.1309616062 |
| C | -2.2238302917 | -0.0699984484 | -1.1186893696 |
| O | 1.040381574   | 2.4919914314  | -0.0446043294 |
| O | 2.1929112463  | 0.8840705633  | -1.2641861529 |
| H | 1.8598733461  | 3.0120242778  | -0.1110723531 |
| O | -3.1333797201 | 0.7941965257  | -1.6326566426 |
| O | -2.4623728829 | -1.2671533333 | -1.0006028365 |
| C | -4.3851003036 | 0.2184868466  | -2.0458556735 |
| H | -4.2276196039 | -0.555222417  | -2.8017664551 |
| H | -4.915983794  | -0.2139844489 | -1.1936683476 |
| H | -4.9621054627 | 1.0427666933  | -2.4658781331 |
| H | -0.9191179792 | 1.6312208419  | -1.2610671415 |
| C | 1.7212419584  | 1.3238553926  | -2.5434617077 |
| H | 2.5597546171  | 1.1854860348  | -3.2291651517 |
| H | 0.8728694639  | 0.723798386   | -2.8888742344 |
| H | 1.4379527267  | 2.3804094343  | -2.5295504965 |

### E-15a\_t1

|   |               |               |               |
|---|---------------|---------------|---------------|
| C | 1.7840984566  | -0.6526709031 | 1.4886822652  |
| N | 2.4792422061  | -1.5012848754 | 2.1477134498  |
| C | 3.7906849911  | -0.8172917134 | 2.3161551047  |
| C | 3.7963105293  | 0.3634417309  | 1.2983545497  |
| N | 2.3470623939  | 0.5597766111  | 1.1404730165  |
| H | 4.6127971662  | -1.5155070549 | 2.1382304509  |
| H | 3.8831810311  | -0.4474236103 | 3.3454591551  |
| H | 4.2554913895  | 0.0704711402  | 0.3461866873  |
| H | 4.2904703405  | 1.2589188483  | 1.6794488062  |
| N | 0.5025425023  | -0.7303719345 | 0.963246085   |
| C | -0.4116809613 | -1.8422949996 | 1.248185824   |
| C | -1.5438445822 | -1.4904436115 | 2.1556528817  |
| H | -0.8194520778 | -2.2146781642 | 0.3048722626  |
| H | 0.2068795452  | -2.6306354104 | 1.6857512113  |
| O | -1.2269384424 | -1.1243649441 | 3.4370766521  |
| C | -2.4026254689 | -0.8852330306 | 4.0896411217  |
| C | -3.4584189895 | -1.0975531351 | 3.2580344603  |
| C | -2.898710023  | -1.489992876  | 1.9961881901  |
| H | -3.4328126221 | -1.7413873381 | 1.0903726638  |
| H | -4.5047498952 | -0.9869365611 | 3.506105453   |
| H | -2.3161018217 | -0.5765093212 | 5.1209499015  |
| C | 0.2817554959  | 0.3239826374  | 0.1069377802  |
| C | -0.8728857781 | 0.5452090091  | -0.574389141  |
| C | 1.6113100176  | 1.1384095649  | 0.0275542267  |
| C | -1.1043770883 | 1.6627387113  | -1.4738194746 |
| O | 1.466097251   | 2.4943592745  | 0.2218148469  |
| O | 2.1756849135  | 0.811092696   | -1.231322668  |
| H | 0.8206953809  | 2.7811288643  | -0.4729956248 |
| O | -2.2649727232 | 1.5121532603  | -2.1387884058 |
| O | -0.3920617687 | 2.6598197106  | -1.6456749218 |
| C | -2.6298694282 | 2.5777633398  | -3.0378657741 |
| H | -2.7320428438 | 3.5219425459  | -2.4973350679 |
| H | -1.8835257617 | 2.6900833536  | -3.82794083   |
| H | -3.5881945744 | 2.2819274803  | -3.4645978539 |
| H | -1.6994749425 | -0.1444226532 | -0.4578003027 |
| C | 3.0995637975  | 1.7569249452  | -1.7866995959 |
| H | 3.5586441248  | 1.2478195134  | -2.6372861355 |
| H | 2.5892265636  | 2.6574064629  | -2.142077161  |
| H | 3.8836516962  | 2.0471984367  | -1.0805020893 |

### 15a\_t2

|   |              |               |               |
|---|--------------|---------------|---------------|
| C | 0.498140491  | -1.6749327962 | 0.5108876721  |
| N | 0.5037083634 | -2.9282378323 | 0.7680254137  |
| C | 1.2619488315 | -3.5539755554 | -0.3405416717 |
| C | 1.5489713645 | -2.4450051805 | -1.4030013723 |
| N | 1.1446139952 | -1.2460984245 | -0.6559602973 |
| H | 0.6852587519 | -4.3758766902 | -0.7759228854 |
| H | 2.1959858273 | -3.9794089246 | 0.0452441143  |
| H | 0.9366402175 | -2.5571617118 | -2.3016574686 |

|   |               |               |               |
|---|---------------|---------------|---------------|
| H | 2.5964314909  | -2.3909842688 | -1.6941606029 |
| N | -0.0609758407 | -0.5962364939 | 1.1313758928  |
| C | -0.5026773242 | -0.6218773686 | 2.5279931907  |
| C | -1.8034385065 | 0.0770512943  | 2.7473598604  |
| H | -0.5863649799 | -1.6775735678 | 2.80101046    |
| H | 0.2510521701  | -0.163255019  | 3.1748946572  |
| O | -2.9233250648 | -0.4856295837 | 2.1949573234  |
| C | -3.9835760731 | 0.3020258471  | 2.54164621    |
| C | -3.5689402343 | 1.3496210315  | 3.3041658421  |
| C | -2.1468196391 | 1.2042336364  | 3.4386277743  |
| H | -1.4679885994 | 1.846964288   | 3.9821235371  |
| H | -4.1916952037 | 2.1290313393  | 3.7202190681  |
| H | -4.9476926517 | -0.0138105074 | 2.1714808984  |
| C | 0.9909455085  | 0.0922199571  | -0.8607593149 |
| C | 1.258959927   | 0.9359473015  | -1.8928756608 |
| C | 0.3725333029  | 0.6274025364  | 0.4607421204  |
| C | 1.8974415887  | 0.7072908005  | -3.1838299096 |
| O | -0.6636564042 | 1.5028594456  | 0.1554980919  |
| O | 1.3227257734  | 1.2129304348  | 1.3255088048  |
| H | -1.019005222  | 1.8446002499  | 0.9953394222  |
| O | 2.4903878917  | -0.5046243415 | -3.3137321005 |
| O | 1.9240910305  | 1.5469905466  | -4.0746428341 |
| C | 3.1144805749  | -0.7639476594 | -4.5834138639 |
| H | 3.5237357302  | -1.7719298168 | -4.5101173349 |
| H | 2.3838871383  | -0.7133045716 | -5.3949661983 |
| H | 3.916241807   | -0.0463765187 | -4.7757820166 |
| H | 0.9220165885  | 1.9565757226  | -1.764210731  |
| C | 1.8781766613  | 2.4813036549  | 0.9551410092  |
| H | 2.4367375408  | 2.8231773177  | 1.8288215244  |
| H | 2.5625191545  | 2.3872593284  | 0.1056729501  |
| H | 1.099186022   | 3.2113810999  | 0.7170764253  |

#### **E-15a\_t2**

|   |               |               |               |
|---|---------------|---------------|---------------|
| C | 0.3295406567  | -1.6072453654 | 0.5056546516  |
| N | 0.3044514148  | -2.8731981541 | 0.6979528108  |
| C | 1.0083912659  | -3.4695047502 | -0.464404512  |
| C | 1.358481563   | -2.3096191634 | -1.4593259913 |
| N | 0.9496479927  | -1.1575243598 | -0.6622039913 |
| H | 0.3710047813  | -4.2188132878 | -0.9437045874 |
| H | 1.9161553288  | -3.9803999671 | -0.1249386446 |
| H | 0.7829510708  | -2.3578197134 | -2.3891763655 |
| H | 2.422745043   | -2.2569281599 | -1.7024707298 |
| N | -0.1468785153 | -0.5282668005 | 1.1890342425  |
| C | -0.5142797031 | -0.6049019712 | 2.6026357204  |
| C | -1.8867251198 | -0.105760042  | 2.913053298   |
| H | -0.4248464558 | -1.6599325743 | 2.8811445364  |
| H | 0.205804988   | -0.0450969545 | 3.2076067169  |
| O | -2.9352635411 | -0.7085254608 | 2.2723363932  |
| C | -4.0815055865 | -0.1353770035 | 2.7469170109  |
| C | -3.7875909225 | 0.8089930908  | 3.6809078218  |

|   |               |               |               |
|---|---------------|---------------|---------------|
| C | -2.3558343764 | 0.8286699203  | 3.789359694   |
| H | -1.7546323601 | 1.453428226   | 4.4353158228  |
| H | -4.4962788625 | 1.4197155982  | 4.2228049399  |
| H | -5.0043770126 | -0.5022764513 | 2.3226706845  |
| C | 0.9264740476  | 0.1841760972  | -0.7901525438 |
| C | 1.3864979468  | 0.8982204977  | -1.8586050638 |
| C | 0.3035904728  | 0.7166568408  | 0.5387908368  |
| C | 1.2677547119  | 2.3317525642  | -1.9926577193 |
| O | -0.7708305611 | 1.5539752132  | 0.3468262449  |
| O | 1.3576378581  | 1.3059087811  | 1.2774847778  |
| H | -0.4219606088 | 2.2800147018  | -0.2348547186 |
| O | 1.9521827164  | 2.7880430984  | -3.0603446746 |
| O | 0.6165528016  | 3.1064021193  | -1.2735815923 |
| C | 1.8613395259  | 4.2014885036  | -3.3212385959 |
| H | 2.4530809316  | 4.3693993171  | -4.221225475  |
| H | 0.8236417063  | 4.4993452101  | -3.4909025969 |
| H | 2.2720402176  | 4.777252711   | -2.4881662681 |
| H | 1.8585361846  | 0.3656735476  | -2.6765347364 |
| C | 1.0685514405  | 2.4910817932  | 2.0334411618  |
| H | 1.9553000467  | 2.6586232706  | 2.649015276   |
| H | 0.9183879754  | 3.3567491265  | 1.3813962365  |
| H | 0.1968819367  | 2.3738139505  | 2.6828959292  |

#### 16a\_t1

|   |               |               |               |
|---|---------------|---------------|---------------|
| C | 0.8738242985  | 0.2076299076  | 2.2763306237  |
| N | 1.3614127605  | -0.3188179121 | 3.3494773716  |
| C | 1.2766602423  | 0.7218983867  | 4.3882254587  |
| C | 0.3722475779  | 1.8374848357  | 3.8105850094  |
| N | 0.4039836877  | 1.5145179124  | 2.3718778575  |
| H | 2.2817789887  | 1.1097885164  | 4.6028403443  |
| H | 0.8807460385  | 0.3138021316  | 5.3235809549  |
| H | 0.7487311593  | 2.8441239032  | 3.9980430199  |
| H | -0.6530784421 | 1.7652329288  | 4.1961781252  |
| N | 0.8426570288  | -0.4178146675 | 1.0416818097  |
| C | 1.249933946   | -1.8403328878 | 0.9655930348  |
| C | 0.1322294456  | -2.7668120248 | 0.6249200209  |
| H | 2.036821793   | -1.95177155   | 0.2210957211  |
| H | 1.6605354569  | -2.0734718259 | 1.9487126315  |
| O | -0.8614903485 | -2.9257151773 | 1.5569869034  |
| C | -1.7537028199 | -3.8243505128 | 1.0471146329  |
| C | -1.3525612294 | -4.2470557332 | -0.182502843  |
| C | -0.1258909726 | -3.5558778123 | -0.45917847   |
| H | 0.4864007588  | -3.6328564421 | -1.3465270512 |
| H | -1.8641566887 | -4.9577893161 | -0.816419071  |
| H | -2.6050039295 | -4.0515895387 | 1.6715766678  |
| C | 0.2594303153  | 0.2592330631  | -0.033560866  |
| C | -0.4083082818 | 1.4168377061  | 0.119472123   |
| C | 0.5392883023  | -0.2521102468 | -1.4176611494 |
| C | -0.5946795336 | 2.0485801319  | 1.4705616844  |
| O | -0.4699417196 | 0.0186247293  | -2.2551230687 |

O 1.5737836903 -0.8008581556 -1.7500584782  
C -0.2463044958 -0.3265206452 -3.640755885  
O -0.3651757641 3.4446392924 1.4888567732  
O -1.9269790731 1.7686944568 1.8721356587  
C -1.2286047591 4.2477800807 0.6784978502  
H -2.2827060139 3.9971764829 0.8318099519  
H -1.0563818461 5.2805857217 0.9889090851  
H -0.9865923952 4.157027734 -0.3872197678  
H -1.1527579631 -0.0237675672 -4.1635695347  
H 0.6192118281 0.2109851355 -4.0346575048  
H -0.0891459512 -1.4024322762 -3.7433286487  
H -0.8218344624 1.9208753338 -0.7418413214  
H -2.1213116288 2.323523901 2.6472253464

### 16a\_t2

C 0.2590947781 -0.5599916299 1.4615403657  
N 0.2193481861 -1.2098840518 2.5769066791  
C 1.5996025428 -1.2498339635 3.0887115463  
C 2.4142535828 -0.2413611411 2.2435287887  
N 1.5090018206 -0.0603852868 1.0916204924  
H 2.0069185035 -2.2650317652 2.9873100979  
H 1.62453871 -0.995813232 4.1529503659  
H 3.381587865 -0.6223407496 1.923889945  
H 2.5608877749 0.7145882406 2.7607265302  
N -0.8038604117 -0.372641516 0.6043878077  
C -2.1110091902 -0.9195570552 1.0188678621  
C -2.6926596676 -1.9090913832 0.0624054462  
H -1.9523673774 -1.3821750553 1.9952944431  
H -2.8264936114 -0.1039533924 1.1503937061  
O -1.955341191 -3.0261711238 -0.2212508166  
C -2.7022326325 -3.8012967686 -1.0640217808  
C -3.8997885498 -3.2083403384 -1.3168240826  
C -3.8947537783 -1.9739456298 -0.5827695204  
H -4.6824637839 -1.2343802031 -0.5352935308  
H -4.6884909243 -3.5947545852 -1.9471588708  
H -2.2437732792 -4.7238061863 -1.3880184853  
C 1.6522164512 0.7763152976 -0.0008131639  
C 0.5814373748 1.1388915875 -0.7330129331  
C 3.0437139553 1.145052636 -0.4167788449  
C -0.8140499217 0.7398263383 -0.3487272482  
O 3.0510514658 2.2036233268 -1.2389185596  
O 4.0460005807 0.5516454275 -0.064072477  
C 4.3443397855 2.5888163249 -1.7543421596  
O -1.4642797897 0.3850700569 -1.5407344433  
O -1.5256678824 1.7865007671 0.3129378981  
H -2.3934596817 0.1833708659 -1.3380453848  
H 4.1559283553 3.4505586948 -2.3936176313  
H 5.0147460286 2.8609712868 -0.936105793  
H 4.7840378557 1.7737198304 -2.3337746386  
H 0.6968889784 1.7206835488 -1.6354596852

|   |               |              |               |
|---|---------------|--------------|---------------|
| C | -1.7059183631 | 2.9966813968 | -0.4284801266 |
| H | -2.3811823946 | 3.6172524218 | 0.1647730145  |
| H | -0.7595461097 | 3.5338387116 | -0.5642964221 |
| H | -2.1572850551 | 2.8089452972 | -1.4080593904 |

#### 17a\_t1

|   |               |               |               |
|---|---------------|---------------|---------------|
| C | 1.7956272899  | -0.809391473  | 1.1699670357  |
| N | 2.4288578082  | -1.6136961215 | 1.9289061118  |
| C | 3.7672631539  | -1.000808914  | 2.1275044014  |
| C | 3.8044281839  | 0.3485667821  | 1.3251331407  |
| N | 2.4574018772  | 0.342678178   | 0.7565213557  |
| H | 4.5394998686  | -1.6926558543 | 1.7782424054  |
| H | 3.9334032713  | -0.8309029226 | 3.1954622608  |
| H | 4.5571972392  | 0.3535715742  | 0.5337788659  |
| H | 3.9471420011  | 1.2219445016  | 1.9652889855  |
| N | 0.5231170907  | -0.8054387511 | 0.630207461   |
| C | -0.487511341  | -1.7946812185 | 1.0568415413  |
| C | -1.4298410709 | -1.2815800128 | 2.0932095547  |
| H | -1.0579567026 | -2.0992711315 | 0.1824967422  |
| H | 0.0791302104  | -2.6482644698 | 1.4363949788  |
| O | -0.9268971944 | -1.0683251663 | 3.3516320474  |
| C | -1.9589059397 | -0.626775564  | 4.1280448933  |
| C | -3.1063953712 | -0.5590421603 | 3.3994856096  |
| C | -2.7612955083 | -0.9829884353 | 2.0732200233  |
| H | -3.4116600684 | -1.0579522888 | 1.2140018952  |
| H | -4.0772240001 | -0.2461471856 | 3.7575220589  |
| H | -1.7167395879 | -0.4105915286 | 5.1580268313  |
| C | 0.3614650873  | 0.3522793829  | -0.1266294552 |
| C | -0.6461578458 | 0.847580662   | -0.8842815009 |
| C | 1.66649237    | 1.131421614   | -0.0092036599 |
| C | -1.9143897166 | 0.2268101083  | -1.2776738578 |
| O | 1.952552886   | 2.2157921584  | -0.5090905064 |
| O | -2.7425677244 | 1.1657570746  | -1.7853096988 |
| O | -2.2156758423 | -0.959171054  | -1.2278297456 |
| C | -4.0082916673 | 0.6896791745  | -2.2808414325 |
| H | -3.8608577291 | -0.0544341398 | -3.0675220155 |
| H | -4.6001185445 | 0.2504854329  | -1.4737116015 |
| H | -4.5139509487 | 1.5681176543  | -2.681673483  |
| H | -0.4740055093 | 1.8398991521  | -1.2894879239 |
| H | 0.9644359713  | 3.4024828056  | -1.5399514505 |
| O | 0.4137878789  | 3.9024288931  | -2.1701655669 |
| C | 0.8971941264  | 3.5934007754  | -3.4699633306 |
| H | 0.2631449069  | 4.1136513315  | -4.1951339539 |
| H | 1.9332839176  | 3.9309474011  | -3.6241151837 |
| H | 0.8532651739  | 2.5171967351  | -3.6937778332 |

#### E-17a\_t1

|   |              |               |              |
|---|--------------|---------------|--------------|
| C | 1.7861939424 | -0.7048588824 | 1.1237801919 |
| N | 2.304285428  | -1.2351333954 | 2.1684585982 |
| C | 3.7704205521 | -1.0219262626 | 2.0431197196 |

|   |               |               |               |
|---|---------------|---------------|---------------|
| C | 4.0283566857  | -0.341491672  | 0.654387645   |
| N | 2.6514394938  | -0.1308312496 | 0.2107612976  |
| H | 4.2888486773  | -1.9813634025 | 2.1212409902  |
| H | 4.1154944997  | -0.3879935977 | 2.8657820834  |
| H | 4.560741813   | -0.992642637  | -0.0439440628 |
| H | 4.5610063455  | 0.6078780468  | 0.7382752537  |
| N | 0.5048550439  | -0.5722842819 | 0.6475058344  |
| C | -0.6799070218 | -1.08200722   | 1.3294132503  |
| C | -1.5687146244 | 0.0075396365  | 1.8559670879  |
| H | -1.2485270276 | -1.7132753199 | 0.6377024245  |
| H | -0.330043216  | -1.7260496966 | 2.1441362243  |
| O | -2.8890576588 | -0.3304439659 | 1.9758396753  |
| C | -3.5358901282 | 0.7501149896  | 2.5102872996  |
| C | -2.6563719978 | 1.764319555   | 2.7253202902  |
| C | -1.3715388439 | 1.2809640178  | 2.3019098575  |
| H | -0.4335744655 | 1.8170780482  | 2.3263985476  |
| H | -2.8861289821 | 2.7391210145  | 3.1325590434  |
| H | -4.5979010901 | 0.6345086158  | 2.6669738331  |
| C | 0.5353133181  | 0.0567944802  | -0.6060378327 |
| C | -0.5674380935 | 0.2784860606  | -1.3549387856 |
| C | 2.0099262717  | 0.317346152   | -0.9164031648 |
| C | -0.6488637074 | 0.9887091808  | -2.6441515577 |
| O | 2.5275187866  | 0.7717350874  | -1.9183489517 |
| O | -1.7849590096 | 0.605500986   | -3.2815255789 |
| O | 0.1131331112  | 1.8227406445  | -3.094757425  |
| C | -2.0392040998 | 1.2538322054  | -4.540590499  |
| H | -2.1348157773 | 2.3349220395  | -4.4083218255 |
| H | -1.2358034537 | 1.0485398525  | -5.252849319  |
| H | -2.978204674  | 0.8349092884  | -4.9029738836 |
| H | -1.5178596031 | -0.0932209588 | -0.9886488929 |
| H | 1.3676913547  | -2.2349090351 | 3.4424696285  |
| O | 0.7565969762  | -2.8121670559 | 3.9517468145  |
| C | 1.077837198   | -4.1520217116 | 3.6139563406  |
| H | 0.3508293286  | -4.8089656877 | 4.1033141688  |
| H | 1.0273597444  | -4.3424053876 | 2.5311169541  |
| H | 2.0810109036  | -4.4456474812 | 3.9609017252  |

#### 17a\_t2

|   |               |               |               |
|---|---------------|---------------|---------------|
| C | 0.6337205887  | -1.0824383562 | 0.6384641725  |
| N | 0.6215243802  | -2.2486106883 | 1.1491266072  |
| C | 1.1934971537  | -3.1314158627 | 0.0994466962  |
| C | 1.6718464206  | -2.2243953689 | -1.0820862069 |
| N | 1.1395988207  | -0.9233203027 | -0.648398904  |
| H | 0.4255181309  | -3.8402606992 | -0.2274892496 |
| H | 2.0206822375  | -3.7104754522 | 0.5192347293  |
| H | 1.2578849838  | -2.5137515418 | -2.0459669355 |
| H | 2.7601397968  | -2.1786997312 | -1.1613344284 |
| N | 0.2529698269  | 0.1608271007  | 1.1157947447  |
| C | -0.3572895731 | 0.4178741789  | 2.4316903937  |
| C | -1.8437482864 | 0.5299541568  | 2.3942108301  |



H -0.0376857723 -0.3961277125 3.0865128009  
H 0.0543733568 1.3550645925 2.8109999003  
O -2.5597097541 -0.6266405284 2.2237845617  
C -3.8808540608 -0.2831195997 2.2267289474  
C -4.02249315 1.0596123199 2.3993498457  
C -2.6943308224 1.5908642726 2.5076252624  
H -2.3967346807 2.6206756118 2.6495802491  
H -4.9541450321 1.6060394802 2.4454988504  
H -4.5806828286 -1.0960479282 2.1006807126  
C 1.1601604071 0.39255581 -1.0116956161  
C 1.5754304181 1.0769116132 -2.1069364925  
C 0.5488597647 1.1208846589 0.1690121853  
C 2.1379351106 0.4993536063 -3.3237268271  
O 0.3608777163 2.3262602527 0.2658124271  
O 2.5053433666 1.4798734227 -4.1828993068  
O 2.2667126318 -0.6899127206 -3.5814923342  
C 3.0596663328 1.0379474602 -5.4349986481  
H 3.2905449539 1.946728064 -5.991249555  
H 3.9696827436 0.4543394876 -5.2726902395  
H 2.3370554863 0.4315282279 -5.9874264657  
H 1.4601312613 2.1534199112 -2.0673500634  
H -0.0882989193 3.3710084656 1.771000608  
O -0.2491113896 3.7972945649 2.6317380405  
C 0.7010981436 4.8437431385 2.7830582159  
H 0.5522995048 5.2884755598 3.7718728655  
H 1.7378101855 4.4813900526 2.7253713737  
H 0.573786546 5.6369114829 2.0314342523

#### E-17a\_t2

C 0.484746677 -1.2809156102 0.5720035115  
N 0.2048855477 -2.5108999248 0.7615487895  
C 0.6322370992 -3.1949497024 -0.4887809665  
C 1.2370694761 -2.1125165998 -1.4506496379  
N 1.0605238078 -0.9163929931 -0.6306047839  
H -0.2310133671 -3.690895877 -0.9424606473  
H 1.3684894496 -3.96688948 -0.2462637308  
H 0.6884527681 -2.023471935 -2.3923758414  
H 2.2958039641 -2.2796527804 -1.668936047  
N 0.3544556699 -0.1371166505 1.3350819837  
C -0.2049298378 -0.0678884788 2.6935707743  
C -1.6320589155 0.3636644789 2.741493477  
H -0.0817271203 -1.0590703769 3.1358492216  
H 0.4027494684 0.6401915918 3.2594587012  
O -2.5830481116 -0.5852624643 2.465713977  
C -3.7986083363 0.0273608984 2.5630457978  
C -3.6448491538 1.3385092336 2.8954482826  
C -2.2320450219 1.559260749 3.0108963938  
H -1.7171625525 2.4818487563 3.248528695  
H -4.4363679664 2.0600396212 3.0426937781  
H -4.6591117817 -0.597478754 2.3747083929

C 1.3408233811 0.4199843292 -0.7032800371  
C 1.9293699495 1.0234704588 -1.7706402793  
C 0.8601532863 0.9571969765 0.6413189979  
C 2.2555824864 2.4382801047 -1.9555492019  
O 0.904226825 2.0940109475 1.0754276447  
O 2.8939810256 2.5834337696 -3.1516730683  
O 2.0248130142 3.3825577706 -1.2200778633  
C 3.278566324 3.9258968847 -3.4876013974  
H 3.7625346761 3.8592347451 -4.4625652109  
H 2.4044775381 4.5802090351 -3.5467084657  
H 3.9771807018 4.3290748023 -2.749198669  
H 2.1952072864 0.3792262739 -2.6023705804  
H 0.3772502382 3.3140351335 2.4369113131  
O 0.0413156288 4.0571672059 2.9665331998  
C -0.4162976075 5.034876924 2.0409285284  
H -0.7709138 5.8967053302 2.6150206507  
H 0.3832248302 5.3787142662 1.3686680508  
H -1.2502155473 4.6732533402 1.4212912669

#### 18a\_t1

C 0.473886546 0.4585830677 2.2532550421  
N 0.9418124866 0.0223463581 3.3649479199  
C 0.5787975707 1.0120546124 4.3986550786  
C -0.341968651 2.0625525328 3.7194991335  
N -0.2451809532 1.6559115761 2.3074425412  
H 1.4896927937 1.476084409 4.7942349342  
H 0.0751711505 0.517552466 5.234586132  
H -0.0116888242 3.0952416971 3.8426881025  
H -1.3839335866 1.989896834 4.0460346217  
N 0.6170236113 -0.1524534542 1.0140323851  
C 1.2856668315 -1.4823877526 0.9763202864  
C 0.3644503482 -2.6026525079 0.6361936941  
H 2.0946974517 -1.4489556634 0.2494112236  
H 1.7092892563 -1.6148821708 1.9721991315  
O -0.6081497523 -2.9159266772 1.5505652966  
C -1.3021394703 -3.9799967806 1.0517912214  
C -0.7930215787 -4.3576941763 -0.1523503176  
C 0.2907019257 -3.4584279933 -0.4252758115  
H 0.9337406097 -3.448214527 -1.2937640972  
H -1.1436739677 -5.1707559807 -0.7723885449  
H -2.1147135007 -4.3425838303 1.663782566  
C 0.0453515092 0.441964194 -0.0955038126  
C -0.6745832927 1.5920114819 -0.0206745012  
C 0.3493998235 -0.1356226868 -1.4555382293  
C -0.8637546353 2.2752589554 1.2497578634  
O -0.7204169771 -0.0830535365 -2.2493609099  
O 1.4477003308 -0.5340129924 -1.7912587537  
C -0.5131692727 -0.5057074986 -3.6195710499  
O -1.5162063667 3.3206473583 1.3861132965  
H -1.4780385034 -0.3780582501 -4.1078254992

|   |               |               |               |
|---|---------------|---------------|---------------|
| H | 0.2447647009  | 0.117733422   | -4.0982155439 |
| H | -0.2054551522 | -1.5529246308 | -3.6478146583 |
| H | -1.0983362593 | 2.0395541064  | -0.9080690881 |
| H | -1.2233376429 | 4.6411835325  | 2.6372229956  |
| O | -0.9163574947 | 5.3600534902  | 3.2233870378  |
| C | -0.0500507257 | 6.175429654   | 2.4507965855  |
| H | 0.3475665429  | 6.9586378086  | 3.1049785704  |
| H | 0.8041924327  | 5.6180393087  | 2.0370852737  |
| H | -0.5675963141 | 6.6689512442  | 1.6134138841  |

#### 18a\_t2

|   |               |               |               |
|---|---------------|---------------|---------------|
| C | 0.017924878   | -0.6750117522 | 1.4504349456  |
| N | 0.1860195191  | -1.599490144  | 2.3228553698  |
| C | 1.6206099635  | -1.6167684582 | 2.6554987981  |
| C | 2.3217139564  | -0.5794560854 | 1.735984971   |
| N | 1.1610430515  | 0.0172171469  | 1.0351772385  |
| H | 2.0298263099  | -2.6205683683 | 2.5034366547  |
| H | 1.7562893212  | -1.3668678237 | 3.7138936423  |
| H | 2.9963379665  | -1.038361485  | 1.0126214154  |
| H | 2.8678246877  | 0.1866885997  | 2.2871264516  |
| N | -1.1991106326 | -0.306379664  | 0.8944433234  |
| C | -2.4240541436 | -1.0247033119 | 1.3157634938  |
| C | -2.8729225261 | -2.0732442813 | 0.354215664   |
| H | -2.2098561986 | -1.4614184328 | 2.2913841893  |
| H | -3.2127441433 | -0.2799316989 | 1.4172214053  |
| O | -2.2360205652 | -3.2876422098 | 0.4005383219  |
| C | -2.8122697799 | -4.0816761885 | -0.5476801689 |
| C | -3.8024012667 | -3.407447165  | -1.1943379382 |
| C | -3.8401925074 | -2.0991584117 | -0.6084521368 |
| H | -4.4959696401 | -1.2806332171 | -0.868583252  |
| H | -4.4285263566 | -3.7904740558 | -1.9880766213 |
| H | -2.4144458577 | -5.0821912631 | -0.6320430531 |
| C | 1.096422545   | 1.0466504026  | 0.1428569409  |
| C | -0.1028162407 | 1.4304999178  | -0.3799149192 |
| C | 2.3833125152  | 1.7093186578  | -0.2694108708 |
| C | -1.3236579862 | 0.7473921534  | -0.011677432  |
| O | 2.1541330448  | 2.8589139187  | -0.907336183  |
| O | 3.4866207466  | 1.2459973958  | -0.0569292755 |
| C | 3.3259301421  | 3.5560406159  | -1.392013469  |
| O | -2.4445338459 | 1.0510288977  | -0.4502124054 |
| H | 2.946496772   | 4.4574832646  | -1.8707020312 |
| H | 3.9845045963  | 3.8121652755  | -0.5594846899 |
| H | 3.8637913128  | 2.9368242859  | -2.1131567653 |
| H | -0.1802062266 | 2.2411668518  | -1.0892538525 |
| H | -2.3979990954 | 2.4580286257  | -1.6216374175 |
| O | -2.2304781758 | 3.2701567119  | -2.1415598839 |
| C | -2.619501205  | 4.3640393363  | -1.3262345074 |
| H | -2.400226202  | 5.2873311406  | -1.8729504596 |
| H | -3.6964130469 | 4.3584673362  | -1.0963167854 |
| H | -2.071535686  | 4.4007674821  | -0.3722617075 |

### S7.3. B3LYP Optimized geometries (from 1b tautomers)

#### **1b\_t1**

|   |               |               |               |
|---|---------------|---------------|---------------|
| C | 0.038522206   | 0.859363814   | 0.0191778037  |
| N | -0.1386724416 | 1.9107697718  | 0.8936201726  |
| N | 1.1213767908  | 0.6082940438  | -0.6539882001 |
| C | -1.4542177983 | 2.3469764255  | 1.3750658068  |
| H | 0.5490914016  | 2.6468507902  | 0.8179925334  |
| C | -2.3704914887 | 1.1421465004  | 1.5617497256  |
| H | -1.3103802082 | 2.8790595665  | 2.3204990489  |
| H | -1.9136640632 | 3.0529265981  | 0.6672531895  |
| C | -2.3775764854 | 0.3134846439  | 0.2804960998  |
| H | -2.0133443551 | 0.5261187135  | 2.3947950989  |
| H | -3.3827156505 | 1.4821304591  | 1.7994103778  |
| N | -1.0024183577 | -0.0505866833 | -0.0531023362 |
| H | -2.9492225033 | -0.6094633415 | 0.4153423083  |
| H | -2.8605406357 | 0.884659202   | -0.5285889198 |
| H | -0.8790721664 | -0.7109037038 | -0.8099303852 |
| C | 2.2517821904  | 1.5117735893  | -0.4685111069 |
| H | 2.034942639   | 2.543352884   | -0.7942287037 |
| H | 2.5475145191  | 1.5880176645  | 0.593522317   |
| C | 3.4417300577  | 1.0636317442  | -1.2543484503 |
| C | 4.1254806416  | 1.5983265006  | -2.3073392657 |
| C | 5.1967104935  | 0.6903961837  | -2.6113197433 |
| C | 5.0863081642  | -0.3315608234 | -1.7204115684 |
| O | 4.025351422   | -0.1212155184 | -0.8849323767 |
| H | 5.6491628775  | -1.237910343  | -1.5523983714 |
| H | 5.9432743455  | 0.7889181177  | -3.3873362688 |
| H | 3.8921734051  | 2.5280012009  | -2.8082107859 |

#### **1b\_t2**

|   |               |               |               |
|---|---------------|---------------|---------------|
| C | -0.9048163869 | 0.0227717424  | -0.4005870547 |
| N | -1.5023260037 | 0.1502271863  | 0.7381154307  |
| C | -1.0851754345 | 1.2571995962  | 1.6030021729  |
| N | 0.0107797254  | 0.9041724583  | -0.9552622081 |
| H | 0.6315797388  | 0.5018735092  | -1.6471579202 |
| N | -1.1675146331 | -1.073083983  | -1.216715549  |
| C | -2.302064283  | -1.9434933355 | -0.9086795801 |
| C | -2.2781044927 | -3.1836514959 | -1.7355916535 |
| H | -2.2476428703 | -2.1908088787 | 0.1551582228  |
| H | -3.2692272981 | -1.4467993368 | -1.0700224237 |
| O | -1.2655211433 | -4.0798341461 | -1.5033289088 |
| C | -1.4519259211 | -5.1309177206 | -2.3551248173 |
| C | -2.5571477009 | -4.9299135782 | -3.1227465979 |
| C | -3.093990828  | -3.6606812906 | -2.7201013496 |
| H | -3.9728353356 | -3.1660899245 | -3.11041076   |
| H | -2.9438999032 | -5.5974337552 | -3.8802104798 |
| H | -0.7244187168 | -5.926535545  | -2.2912174624 |
| H | -1.9597528689 | 1.5916878348  | 2.1755786829  |

|   |               |               |               |
|---|---------------|---------------|---------------|
| H | -0.3633375288 | 0.8871970305  | 2.3485110089  |
| C | -0.4731775554 | 2.4463073871  | 0.8533670609  |
| C | 0.5991318089  | 1.9413665292  | -0.1085472724 |
| H | -0.039490037  | 3.1661467918  | 1.5553623426  |
| H | -1.2530857171 | 2.9665150698  | 0.2839160199  |
| H | -1.0574026257 | -0.8857236272 | -2.207602095  |
| H | 0.9666601961  | 2.7469130462  | -0.7522698914 |
| H | 1.4589078151  | 1.5544514354  | 0.459357082   |

# NCov(1b\_t1)

|   |               |               |               |
|---|---------------|---------------|---------------|
| C | -1.1421325658 | 1.1953121045  | 1.661820871   |
| N | -1.5710510027 | 2.5039329335  | 1.7170464463  |
| N | 0.0252180194  | 0.799841223   | 1.2435306124  |
| C | -2.9756218493 | 2.8889157111  | 1.8914737057  |
| H | -1.0131892795 | 3.1612977398  | 1.190833202   |
| C | -3.6826615721 | 1.8931655942  | 2.8050938098  |
| H | -3.0013733941 | 3.8970832448  | 2.3165659803  |
| H | -3.4916024801 | 2.9284503424  | 0.9205879034  |
| C | -3.4399071415 | 0.4787375749  | 2.2868183976  |
| H | -3.2947025096 | 1.9811991112  | 3.8262820552  |
| H | -4.7543670464 | 2.1114762597  | 2.8282718175  |
| N | -2.0003294235 | 0.2481244863  | 2.1913067658  |
| H | -3.8575508853 | -0.2656613314 | 2.9712469115  |
| H | -3.9428993985 | 0.3495305029  | 1.3148142782  |
| H | -1.7069641795 | -0.6970787629 | 1.9698174887  |
| C | 0.9600524338  | 1.8237411635  | 0.7898396932  |
| H | 0.5886280462  | 2.3837189973  | -0.0850968466 |
| H | 1.1528392354  | 2.580094064   | 1.5719155283  |
| C | 2.2690592653  | 1.2273017453  | 0.3853177529  |
| C | 2.90693422    | 1.0905774084  | -0.813267679  |
| C | 4.1517012024  | 0.424429766   | -0.5473449028 |
| C | 4.1815720514  | 0.2065380786  | 0.7952364478  |
| O | 3.0456147812  | 0.6922499512  | 1.3802321102  |
| H | 4.9009221306  | -0.2473032225 | 1.4608114047  |
| H | 4.9167297427  | 0.1490597818  | -1.2602609396 |
| H | 2.5315599357  | 1.4204672909  | -1.7723141228 |
| C | -0.5984547125 | -1.6271559177 | -2.1909891988 |
| C | -0.3065878201 | -1.9490175777 | -1.0606209736 |
| C | -0.9279174761 | -1.3157635194 | -3.5695518447 |
| C | 0.0089395951  | -2.2776586406 | 0.3174011118  |
| O | -1.0970457395 | -0.0014637931 | -3.7376599141 |
| O | -1.0274438552 | -2.1637375201 | -4.4342321875 |
| C | -1.4259252072 | 0.4207546924  | -5.0849421186 |
| O | 1.3234375263  | -2.3421903039 | 0.5068196721  |
| O | -0.8477456206 | -2.4946541446 | 1.1566090103  |
| C | 1.7508311612  | -2.5782611793 | 1.8710806839  |
| H | -1.5292616067 | 1.5032550389  | -5.0276250066 |
| H | -0.6230872058 | 0.1482738132  | -5.7732409928 |
| H | -2.3633761721 | -0.0374970475 | -5.4069527517 |
| H | 2.8376512758  | -2.6210897409 | 1.8261941548  |

|   |              |               |              |
|---|--------------|---------------|--------------|
| H | 1.4231711958 | -1.7531777843 | 2.5051626594 |
| H | 1.3442143256 | -3.5227641338 | 2.2382670043 |

#### NCov(1b\_t2)

|   |               |               |               |
|---|---------------|---------------|---------------|
| C | 0.0034886299  | 2.2549301685  | 0.6202572978  |
| N | -0.0018345945 | 3.3511795176  | 1.4671705108  |
| N | 1.2598403844  | 1.8243001287  | 0.2135356874  |
| C | -1.2690641426 | 4.0179991957  | 1.7750369447  |
| H | 0.7915056582  | 3.9730183179  | 1.3800876357  |
| C | -2.3855440329 | 2.9789036268  | 1.804419187   |
| H | -1.1693560274 | 4.5225670574  | 2.741831978   |
| H | -1.4989220749 | 4.7886802109  | 1.024376956   |
| C | -2.3532824862 | 2.1699474974  | 0.5036730184  |
| H | -2.2384377124 | 2.3076414287  | 2.6594513375  |
| H | -3.3526714427 | 3.475727975   | 1.9355080461  |
| N | -1.0363245129 | 1.6117218497  | 0.1923802952  |
| H | -3.067976623  | 1.3397266361  | 0.5610113898  |
| H | -2.6994319145 | 2.8068875938  | -0.3273549572 |
| C | 2.4744211237  | 1.937274285   | 1.0291096221  |
| H | 3.2685780105  | 2.447115993   | 0.4711755927  |
| H | 2.2518944089  | 2.5549384302  | 1.9043512637  |
| C | 3.0258429869  | 0.6212050044  | 1.4741420178  |
| C | 4.216264695   | -0.0076377478 | 1.2506663743  |
| C | 4.1666924994  | -1.2508686345 | 1.9678341573  |
| C | 2.9465512917  | -1.2891396025 | 2.5704277911  |
| O | 2.2398493484  | -0.1556393305 | 2.2859567698  |
| H | 2.4512651747  | -2.0087053031 | 3.2055088158  |
| H | 4.9355626347  | -2.0088725797 | 2.0250858058  |
| H | 5.0292787806  | 0.3691818763  | 0.6455158087  |
| H | 1.1993554868  | 0.9808144738  | -0.3495302615 |
| C | -1.9502684248 | -1.567521675  | -1.4956561711 |
| C | -0.7515917205 | -1.7342893717 | -1.4602077904 |
| C | -3.3871552741 | -1.3674569031 | -1.4409917294 |
| C | 0.6920001319  | -1.8579537848 | -1.4275966169 |
| O | 1.0681603315  | -3.1344280849 | -1.4684893674 |
| O | 1.4427492269  | -0.8994401507 | -1.3744986182 |
| C | 2.4984912079  | -3.3763648926 | -1.4245029256 |
| O | -3.9162054349 | -1.3423081229 | -2.6654628214 |
| O | -3.996703759  | -1.2450204845 | -0.3963886715 |
| C | -5.3515829299 | -1.1442875345 | -2.7259946883 |
| H | 2.6048051567  | -4.4586660519 | -1.4779670294 |
| H | 2.9881813706  | -2.8990722875 | -2.2755378456 |
| H | 2.9142464382  | -2.9936953738 | -0.4901561927 |
| H | -5.5969295621 | -1.1581905295 | -3.7867720095 |
| H | -5.8666081446 | -1.9520765838 | -2.2021847662 |
| H | -5.6186021635 | -0.1827632376 | -2.2825818412 |

#### TS1(1b\_t1)

|   |               |              |              |
|---|---------------|--------------|--------------|
| C | -1.2895012539 | 0.8737918454 | 0.6255055582 |
| N | -1.3565141538 | 2.223696989  | 0.8341022945 |

|   |               |               |               |
|---|---------------|---------------|---------------|
| N | -0.3778000965 | 0.298102403   | -0.1356659553 |
| C | -2.4041251951 | 2.8915623985  | 1.610573718   |
| H | -0.8522795853 | 2.8027959294  | 0.1790687441  |
| C | -2.923330136  | 1.9571093982  | 2.6978714138  |
| H | -1.9778767667 | 3.8008216875  | 2.0449970988  |
| H | -3.2317803035 | 3.1946417322  | 0.9538691028  |
| C | -3.3070083409 | 0.6213273817  | 2.0671518534  |
| H | -2.1483619908 | 1.7983551394  | 3.4560873496  |
| H | -3.7907741503 | 2.4085374355  | 3.1876682216  |
| N | -2.1846312098 | 0.0974427794  | 1.2960635961  |
| H | -3.558431082  | -0.1167493629 | 2.8334751826  |
| H | -4.1958940882 | 0.7507918064  | 1.4319059737  |
| H | -2.0682150338 | -0.908533606  | 1.2369141031  |
| C | 0.6261653031  | 1.1495848944  | -0.7620073317 |
| H | 0.2041885608  | 1.7830209556  | -1.5561091926 |
| H | 1.0762353912  | 1.8288068823  | -0.0183435644 |
| C | 1.7213935845  | 0.3469589522  | -1.38478785   |
| C | 2.1755135735  | 0.2214802485  | -2.6661839739 |
| C | 3.2942223185  | -0.6783372872 | -2.6230418142 |
| C | 3.438564589   | -1.0350844069 | -1.3183158544 |
| O | 2.4925688497  | -0.4184170517 | -0.5489184618 |
| H | 4.1244715236  | -1.6847141223 | -0.794933247  |
| H | 3.9022522843  | -1.0127466638 | -3.4522409133 |
| H | 1.7619767859  | 0.7130020466  | -3.5359133599 |
| C | -1.0668096275 | -1.4424487985 | -1.3445989926 |
| C | -1.1145437669 | -2.5182334273 | -0.7219019603 |
| C | -1.3084568095 | -0.7651730538 | -2.6265729812 |
| C | -1.0583184188 | -3.1887447882 | 0.540470874   |
| O | -1.2040962766 | -1.6604451641 | -3.6276134326 |
| O | -1.5929486685 | 0.4038982433  | -2.7910404049 |
| C | -1.4900391154 | -1.1489894069 | -4.9480913466 |
| O | -0.0985896305 | -4.1274701568 | 0.5909672096  |
| O | -1.8220090587 | -2.9408337713 | 1.4724044335  |
| C | 0.0420355951  | -4.8162607848 | 1.8524917605  |
| H | -1.374670663  | -2.0005949668 | -5.6180520144 |
| H | -2.5102303504 | -0.761086867  | -4.9981937888 |
| H | -0.7845991767 | -0.3582549523 | -5.2141922236 |
| H | 0.8696925198  | -5.5109514891 | 1.7114938998  |
| H | 0.2727523617  | -4.1109567936 | 2.6544243386  |
| H | -0.8725462919 | -5.3618452273 | 2.0966699373  |

# TS1(1b\_t2)

|   |               |              |               |
|---|---------------|--------------|---------------|
| C | -0.2761246797 | 1.1111999025 | -0.0983792503 |
| N | -0.3164608107 | 2.366800656  | 0.4435633766  |
| N | 0.9497473658  | 0.6517459258 | -0.5009863816 |
| C | -1.5864919466 | 2.9420384731 | 0.8989663609  |
| H | 0.5189938513  | 2.6980954525 | 0.9056808779  |
| C | -2.5212981332 | 1.8277545018 | 1.3606505554  |
| H | -1.3633619618 | 3.6461711571 | 1.7032583076  |
| H | -2.0503746891 | 3.5081509899 | 0.0810821823  |

|   |               |               |               |
|---|---------------|---------------|---------------|
| C | -2.6402544678 | 0.7903689379  | 0.240895721   |
| H | -2.1155425553 | 1.3631221643  | 2.2669794038  |
| H | -3.5089775956 | 2.2323338618  | 1.6033732238  |
| N | -1.3427838585 | 0.3658828741  | -0.2846619429 |
| H | -3.1674376693 | -0.0996381195 | 0.604892846   |
| H | -3.251827098  | 1.1996525946  | -0.574020219  |
| C | 2.1792698307  | 1.4420347293  | -0.3943228627 |
| H | 1.9808562511  | 2.4525962814  | -0.7618943934 |
| H | 2.5189830159  | 1.5302047445  | 0.6488301047  |
| C | 3.2815352349  | 0.8624665046  | -1.2146232283 |
| C | 3.7660994295  | 1.1302695163  | -2.4617234011 |
| C | 4.8414943093  | 0.2089590683  | -2.6911841338 |
| C | 4.9320784125  | -0.5528732428 | -1.5666843947 |
| O | 3.9924193667  | -0.168278414  | -0.6552598598 |
| H | 5.578909482   | -1.3637788946 | -1.2663536584 |
| H | 5.4625884732  | 0.1300738057  | -3.5725246981 |
| H | 3.4001607839  | 1.8935409135  | -3.1345376894 |
| H | 1.0607290018  | -0.3594921619 | -0.5398431569 |
| C | -1.2794752276 | -1.1449046305 | -1.760117026  |
| C | -0.674056886  | -2.2097120093 | -1.5184170911 |
| C | -2.0895644297 | -0.4008185274 | -2.7323686809 |
| C | 0.1900419847  | -2.843157368  | -0.5707021991 |
| O | -0.3213203869 | -3.9811780784 | -0.0634266673 |
| O | 1.2997036093  | -2.4061206687 | -0.2662226146 |
| C | 0.4922793981  | -4.6503799102 | 0.9218843356  |
| O | -1.3254108383 | 0.0847603075  | -3.7238778428 |
| O | -3.2954889876 | -0.2554261913 | -2.6604109368 |
| C | -2.0290656892 | 0.8168069988  | -4.7530204994 |
| H | -0.079516602  | -5.5282802523 | 1.2226911475  |
| H | 1.4500430314  | -4.9534425128 | 0.4918227011  |
| H | 0.6697864905  | -4.0027132503 | 1.7840896899  |
| H | -1.2626382115 | 1.1278319898  | -5.4622149088 |
| H | -2.7646780772 | 0.1762139296  | -5.2448797276 |
| H | -2.5299205209 | 1.6894709512  | -4.3272773693 |

#### 10b\_t1

|   |               |               |               |
|---|---------------|---------------|---------------|
| C | -1.4614505447 | 0.9000810117  | 0.3447911316  |
| N | -1.3643984735 | 2.1886319131  | 0.7100428676  |
| N | -0.6275727218 | 0.3722046055  | -0.5874977299 |
| C | -2.1037384179 | 2.8033807444  | 1.8231242881  |
| H | -0.8945049246 | 2.8250356479  | 0.0818343111  |
| C | -2.685780449  | 1.730794574   | 2.7362559109  |
| H | -1.4158287303 | 3.4569065381  | 2.367180607   |
| H | -2.904395139  | 3.4268691063  | 1.4090351836  |
| C | -3.3525096645 | 0.6562347203  | 1.8806641311  |
| H | -1.8949622995 | 1.2752495945  | 3.3418227002  |
| H | -3.4106564927 | 2.188657616   | 3.4145960173  |
| N | -2.3880664834 | 0.1175877781  | 0.9154428711  |
| H | -3.7019625946 | -0.1809661396 | 2.4871985043  |
| H | -4.2182471278 | 1.0708907121  | 1.3500885832  |



|   |               |               |               |
|---|---------------|---------------|---------------|
| H | -2.1923698473 | -0.8926158387 | 0.9458599772  |
| C | 0.6316439591  | 1.0368083036  | -0.9851279323 |
| H | 0.543480692   | 1.4021263341  | -2.0115283048 |
| H | 0.8014227841  | 1.8978896692  | -0.3353001161 |
| C | 1.8101861647  | 0.1271483184  | -0.8929697687 |
| C | 2.6585193768  | -0.3993211788 | -1.8223138515 |
| C | 3.6335095618  | -1.1659622639 | -1.1002202692 |
| C | 3.3017702183  | -1.0530424937 | 0.2148066418  |
| O | 2.1984544359  | -0.2634115732 | 0.3624099237  |
| H | 3.7278391531  | -1.4461203717 | 1.1258633976  |
| H | 4.4628745529  | -1.7264761457 | -1.508565784  |
| H | 2.5954603863  | -0.2568590931 | -2.8923164829 |
| C | -1.0776224604 | -0.7524184765 | -1.4322115518 |
| C | -1.0307278958 | -2.0469811277 | -1.1008367018 |
| C | -1.6073898815 | -0.2458935914 | -2.7312989947 |
| C | -0.6536307775 | -2.5457229088 | 0.17582222    |
| O | -1.9616918221 | -1.2296561089 | -3.5846686791 |
| O | -1.7172735523 | 0.9391734317  | -3.0201307155 |
| C | -2.4872308597 | -0.7902718829 | -4.8486163078 |
| O | 0.5425909178  | -3.1960740911 | 0.1895787017  |
| O | -1.3882931714 | -2.527541286  | 1.1849498346  |
| C | 0.9398662121  | -3.7556157474 | 1.4497573747  |
| H | -2.7145213397 | -1.7008226717 | -5.4041786254 |
| H | -3.3962073587 | -0.1981550431 | -4.7115429251 |
| H | -1.7506525133 | -0.1929670534 | -5.3928965033 |
| H | 1.9308279335  | -4.180824055  | 1.2834079778  |
| H | 0.9914657738  | -2.9890935355 | 2.228164678   |
| H | 0.2497324205  | -4.5415769412 | 1.7705314096  |

#### 10b\_t2

|   |               |               |               |
|---|---------------|---------------|---------------|
| C | 0.1783441726  | 1.1538685648  | -0.1774002736 |
| N | -0.0061303519 | 2.3415528091  | 0.4239502315  |
| N | 1.3853079612  | 0.8491052023  | -0.7033243182 |
| C | -1.3117582838 | 2.7643292382  | 0.9401106777  |
| H | 0.8113018026  | 2.8379262411  | 0.7510458071  |
| C | -2.0315249912 | 1.5443768332  | 1.5024899071  |
| H | -1.1299615305 | 3.520567541   | 1.7049503886  |
| H | -1.8966690369 | 3.2252429509  | 0.1357222962  |
| C | -2.1232002839 | 0.4759074178  | 0.4192668445  |
| H | -1.4813358341 | 1.1672593908  | 2.3712110672  |
| H | -3.0406365603 | 1.8088972316  | 1.8303064894  |
| N | -0.8381682315 | 0.279163125   | -0.2874824341 |
| H | -2.4058817582 | -0.4895317012 | 0.8489903489  |
| H | -2.8763307112 | 0.7517781254  | -0.3253197337 |
| C | 2.4982662355  | 1.81036725    | -0.7268768158 |
| H | 2.1144525881  | 2.78250823    | -1.0458647457 |
| H | 2.9351096911  | 1.9325464569  | 0.2742634428  |
| C | 3.5589660593  | 1.3967262359  | -1.6877669481 |
| C | 3.8844878685  | 1.7940583881  | -2.9514791734 |
| C | 5.0184903514  | 1.0102419468  | -3.3479842034 |

C 5.298457232 0.1921821137 -2.2968004276  
O 4.4220932627 0.414463981 -1.2744264135  
H 6.0493655543 -0.5635291372 -2.1203068948  
H 5.5516310769 1.0544402153 -4.2873700491  
H 3.376912534 2.5545784049 -3.5286198578  
H 1.6416860629 -0.1458906854 -0.6794605021  
C -0.8129488576 -0.8002030706 -1.2916095393  
C -0.1977695608 -1.978439024 -1.1409505637  
C -1.5662888761 -0.3999241191 -2.5146199001  
C 0.6533752618 -2.2964947161 -0.0451407353  
O 0.1217681821 -3.1819784155 0.8445266923  
O 1.8351078764 -1.9140457691 0.0518218603  
C 0.9999285216 -3.6190519853 1.8934135508  
O -1.6724027794 -1.3926536787 -3.4229719139  
O -2.0470352281 0.710270029 -2.7015944581  
C -2.3742307625 -1.0510776783 -4.630282359  
H 0.4066447841 -4.2950643396 2.5113936301  
H 1.8660951284 -4.1514327541 1.489724511  
H 1.350839208 -2.7772685361 2.4973388362  
H -2.3641571679 -1.9546368096 -5.2408956641  
H -3.40465566 -0.755929023 -4.4141742308  
H -1.8724499497 -0.2359864799 -5.1588864265

#### TS2(1b\_t1)

C -1.2382834117 1.0321196426 0.5462963088  
N -1.2744321696 2.3250972962 0.9226964224  
N -0.3855853153 0.6321771706 -0.4273786217  
C -2.1209481372 2.8525197741 2.0023078092  
H -0.8729151588 3.0106924876 0.3002632353  
C -2.4967686204 1.7390938518 2.9715257725  
H -1.5610748911 3.6445176031 2.5064327177  
H -3.0228327709 3.3000636059 1.5678706556  
C -3.0214539665 0.5453355281 2.1810620043  
H -1.6230056982 1.4371409656 3.5586753048  
H -3.262219876 2.1015170562 3.6624587645  
N -2.0381580907 0.1519508634 1.1671070408  
H -3.1820622792 -0.3211789875 2.8252039532  
H -3.9772605713 0.791642811 1.702068108  
H -1.8901228704 -0.838389887 0.9967602778  
C 0.6055503744 1.5768083996 -0.9981392853  
H 0.1592446453 2.1483356685 -1.8164284295  
H 0.9085694478 2.2721646212 -0.2097840914  
C 1.8237607084 0.8909539368 -1.5100837916  
C 2.3234597913 0.6881943797 -2.7635058767  
C 3.5713079485 -0.0004116562 -2.6005442359  
C 3.7379080889 -0.1661339801 -1.2599579518  
O 2.6868092112 0.3750794614 -0.5782881106  
H 4.5086440802 -0.6219789689 -0.6561931569  
H 4.2480934331 -0.3268442833 -3.3776948165  
H 1.8542317558 0.989491231 -3.6893942332

|   |               |               |               |
|---|---------------|---------------|---------------|
| C | -0.5190683773 | -0.7180037838 | -1.0040808774 |
| C | -0.3891820982 | -1.7968871844 | -0.267183668  |
| C | -0.9251276146 | -0.656907385  | -2.4429667312 |
| C | -0.6239291451 | -2.9505014633 | 0.4229569376  |
| O | -0.8910084723 | -1.8639944219 | -3.0395029464 |
| O | -1.2593197437 | 0.3635080477  | -3.0281178275 |
| C | -1.2978391417 | -1.8837860576 | -4.4193226549 |
| O | 0.4482756514  | -3.8243917049 | 0.4971783521  |
| O | -1.7103341216 | -3.1952509084 | 1.0074950905  |
| C | 0.2653273717  | -4.9287835402 | 1.3857282783  |
| H | -1.2050889168 | -2.92247158   | -4.73771463   |
| H | -2.3331735773 | -1.5491389716 | -4.5261223901 |
| H | -0.649850562  | -1.2452277338 | -5.0256617911 |
| H | 1.1878743544  | -5.5110452505 | 1.3281447835  |
| H | 0.1079510426  | -4.5993937135 | 2.4188466723  |
| H | -0.5805043069 | -5.5565559401 | 1.0884886287  |

#### TS2(1b\_t2)

|   |               |               |               |
|---|---------------|---------------|---------------|
| C | -0.0581541444 | 1.4873370642  | -0.1990768866 |
| N | -0.1345368593 | 2.6912107539  | 0.3954171789  |
| N | 1.1425353533  | 1.0552557477  | -0.632583044  |
| C | -1.3755969263 | 3.2787723268  | 0.9057044781  |
| H | 0.724601447   | 3.1902433136  | 0.5723816235  |
| C | -2.3178788643 | 2.1569003932  | 1.3177238225  |
| H | -1.1117569103 | 3.9162247499  | 1.7519153104  |
| H | -1.8365949355 | 3.9089156878  | 0.1354641363  |
| C | -2.4772158598 | 1.1879133838  | 0.1537083914  |
| H | -1.9162316099 | 1.6382530277  | 2.1948201415  |
| H | -3.2964936018 | 2.5658905609  | 1.5829022241  |
| N | -1.1658370813 | 0.7373410102  | -0.3635886958 |
| H | -3.0186537509 | 0.2917872777  | 0.4671314043  |
| H | -3.0374804381 | 1.6539408906  | -0.6617961002 |
| C | 2.382629942   | 1.8406465727  | -0.5228680257 |
| H | 2.2731172914  | 2.7796918427  | -1.0750642892 |
| H | 2.5874491014  | 2.0862318405  | 0.5278220331  |
| C | 3.5419933324  | 1.0930825427  | -1.0803295149 |
| C | 4.1770620892  | 1.1085512736  | -2.2877032743 |
| C | 5.2227988484  | 0.1305494143  | -2.2107948365 |
| C | 5.1446165299  | -0.4077021174 | -0.9625037089 |
| O | 4.1312829084  | 0.1689602236  | -0.2574209686 |
| H | 5.7118902997  | -1.1653981574 | -0.442579926  |
| H | 5.9347067717  | -0.1319333158 | -2.9807374099 |
| H | 3.9272835122  | 1.7399143642  | -3.129173157  |
| H | 1.2227941318  | 0.0803139675  | -0.9036428007 |
| C | -1.1148696311 | -0.5435387696 | -1.0908949766 |
| C | -0.3165159587 | -1.5246068318 | -0.742275159  |
| C | -2.0042630547 | -0.5187514878 | -2.2967747919 |
| C | 0.6803485347  | -2.44864765   | -0.6186140497 |
| O | 0.3483768538  | -3.5554395065 | 0.1516741699  |
| O | 1.8242458204  | -2.3209188522 | -1.1192910582 |

|   |               |               |               |
|---|---------------|---------------|---------------|
| C | 1.4247989216  | -4.4619476203 | 0.3965330958  |
| O | -2.1895069986 | -1.7454171565 | -2.8231903437 |
| O | -2.5052793764 | 0.4887445143  | -2.7744221865 |
| C | -2.9962012548 | -1.7916126254 | -4.0134722224 |
| H | 1.006507417   | -5.2577248634 | 1.0174281959  |
| H | 1.8160450685  | -4.8928233274 | -0.5308360909 |
| H | 2.2512145791  | -3.9808552508 | 0.931193236   |
| H | -3.0408034587 | -2.8435366639 | -4.29704468   |
| H | -4.0026184137 | -1.4120435017 | -3.817436746  |
| H | -2.5419186253 | -1.2050670463 | -4.8165254987 |

### 11b\_t1

|   |               |               |               |
|---|---------------|---------------|---------------|
| C | -1.3577531111 | 1.1545754262  | 0.59341402    |
| N | -1.4254541594 | 2.4871272146  | 0.7951194453  |
| N | -0.6546754952 | 0.6576510877  | -0.460699409  |
| C | -2.1305667221 | 3.0970038405  | 1.9322770372  |
| H | -1.260704606  | 3.0902817506  | 0.0014817288  |
| C | -2.2457076681 | 2.1046641767  | 3.0846198895  |
| H | -1.5728639455 | 3.9876059646  | 2.2342343163  |
| H | -3.1276186515 | 3.4177377992  | 1.6072569889  |
| C | -2.7820109785 | 0.7753234002  | 2.5582848569  |
| H | -1.264784868  | 1.9462688102  | 3.5453492654  |
| H | -2.9157589004 | 2.5119767525  | 3.8462683508  |
| N | -1.9448657927 | 0.3205298886  | 1.4488397731  |
| H | -2.7528267922 | 0.0007834126  | 3.3275917729  |
| H | -3.8233094299 | 0.8828914823  | 2.2293208639  |
| H | -1.6734894288 | -0.6742365913 | 1.300575019   |
| C | 0.3585058893  | 1.5062357243  | -1.1391515547 |
| H | -0.0383309509 | 1.8962436441  | -2.078377682  |
| H | 0.5846449364  | 2.3485868677  | -0.4814613765 |
| C | 1.6228233604  | 0.7718038749  | -1.4282968046 |
| C | 2.2531640266  | 0.4215665012  | -2.5869343256 |
| C | 3.4741437934  | -0.2301292789 | -2.2085739023 |
| C | 3.4950692005  | -0.2300203998 | -0.8478833396 |
| O | 2.3786576518  | 0.380584862   | -0.3536137936 |
| H | 4.1940480596  | -0.6035263012 | -0.1142112573 |
| H | 4.2287407551  | -0.6436471594 | -2.8629426601 |
| H | 1.8875211246  | 0.6040323445  | -3.5877115861 |
| C | -0.8178134342 | -0.7229104658 | -0.9127646326 |
| C | -0.9305780686 | -1.7392504013 | -0.0442805327 |
| C | -1.0011312159 | -0.7877553069 | -2.3957387473 |
| C | -1.2566585089 | -3.0974081798 | -0.3969865293 |
| O | -0.7636360621 | -2.019193031  | -2.889850091  |
| O | -1.3521593364 | 0.1476631079  | -3.1012799633 |
| C | -1.0188018948 | -2.187735903  | -4.295147239  |
| O | -0.1468313613 | -3.901516284  | -0.4257427563 |
| O | -2.3907553912 | -3.560658904  | -0.5072373668 |
| C | -0.4047124031 | -5.2966194796 | -0.6258409839 |
| H | -0.7931619417 | -3.232305515  | -4.510952271  |
| H | -2.0643004906 | -1.9720705472 | -4.5307460128 |

H -0.3740459032 -1.533514093 -4.8878653532  
H 0.5708708018 -5.7861346416 -0.6046105485  
H -1.0397108094 -5.7043856173 0.1667136991  
H -0.8870312776 -5.4800948333 -1.5909293082

### 11b\_t2

C 0.128858743 1.7278970857 -0.2444147215  
N -0.1129331184 2.9710983166 0.2175723051  
N 1.385505506 1.3488285236 -0.5085422448  
C -1.4421402751 3.4519986807 0.6003343662  
H 0.6819589967 3.5098488248 0.5301429522  
C -2.2615221489 2.2662656908 1.0879095008  
H -1.3067117636 4.2030765921 1.3806051851  
H -1.9298925597 3.9340765772 -0.2554847868  
C -2.2642279162 1.1932169221 0.0089863411  
H -1.8347897013 1.8797473476 2.0197957367  
H -3.2928829027 2.5703740326 1.2864761635  
N -0.8925671938 0.8608538831 -0.4552887854  
H -2.7060128651 0.2686056521 0.3894831824  
H -2.8564913582 1.5206558338 -0.8485174776  
C 2.5589717822 2.2064451377 -0.3299264269  
H 2.4202882196 3.1502045519 -0.8670938339  
H 2.7013246837 2.4470447049 0.7342874564  
C 3.7828737177 1.5500709832 -0.8676061268  
C 4.6131685043 1.8279699113 -1.9124181441  
C 5.6335497389 0.8184584128 -1.9034765709  
C 5.3455194313 -0.0014995343 -0.8568038598  
O 4.2227313819 0.4302353205 -0.2092573074  
H 5.8109075451 -0.888959537 -0.4545986434  
H 6.4650323924 0.7196746729 -2.5871709749  
H 4.5094670783 2.6515662225 -2.6051311924  
H 1.4688128331 0.3077117255 -0.5982349977  
C -0.6963589392 -0.4542659552 -1.0576110854  
C 0.4312167531 -1.1592814806 -0.8859667276  
C -1.795651914 -0.8004049839 -2.0136005472  
C 0.734612331 -2.3979318836 -1.5568168748  
O 0.5584686752 -3.4805219143 -0.734733776  
O 1.238179625 -2.512254163 -2.6728761035  
C 0.9687389532 -4.7401063456 -1.2809202032  
O -1.967339852 -2.13283989 -2.1305543719  
O -2.4476779182 0.0079806389 -2.6577150853  
C -2.8982764971 -2.556248501 -3.1427644512  
H 0.7750684819 -5.4800956628 -0.5019978409  
H 0.3960634052 -4.9925568953 -2.1786748659  
H 2.03369805 -4.7392959966 -1.5327350868  
H -2.9123530198 -3.6451235564 -3.0912456921  
H -3.8961316617 -2.1567009686 -2.9443847084  
H -2.5700632238 -2.2310739768 -4.1336036753

### TS3(1b\_t1)

|   |               |               |               |
|---|---------------|---------------|---------------|
| C | -1.3255978396 | 1.4004308479  | 0.960321656   |
| N | -1.624443195  | 2.7236400562  | 1.0239330166  |
| N | -0.4474537413 | 0.9709320765  | -0.014220383  |
| C | -2.5696620024 | 3.2616123978  | 2.0113117402  |
| H | -1.5100224903 | 3.2675497563  | 0.17977159    |
| C | -2.6214324527 | 2.3571241294  | 3.2392023762  |
| H | -2.2422161813 | 4.2701751653  | 2.2792602544  |
| H | -3.5666542612 | 3.3419464595  | 1.5599489777  |
| C | -2.8300764871 | 0.9089822945  | 2.7959068803  |
| H | -1.6846672536 | 2.4354575902  | 3.8019597975  |
| H | -3.4350554947 | 2.6810227945  | 3.8943483734  |
| N | -1.8110006475 | 0.528122048   | 1.8196371054  |
| H | -2.7491303563 | 0.2227076545  | 3.6436085609  |
| H | -3.8334791791 | 0.7824380398  | 2.367280608   |
| H | -1.3225310573 | -0.5432247267 | 1.5987964923  |
| C | 0.5724871076  | 1.9213435364  | -0.5356695686 |
| H | 0.3703076792  | 2.1698007097  | -1.5784106152 |
| H | 0.4965801622  | 2.8371828901  | 0.0529051608  |
| C | 1.9665576922  | 1.4014051295  | -0.4356779293 |
| C | 2.9245389196  | 1.1160155335  | -1.3651419895 |
| C | 4.0921373301  | 0.7065148186  | -0.638461514  |
| C | 3.7572850792  | 0.7697905245  | 0.6788979377  |
| O | 2.4684449666  | 1.1963107321  | 0.8235653028  |
| H | 4.2896636537  | 0.5547923294  | 1.5935585058  |
| H | 5.0466048388  | 0.4033333785  | -1.0454959445 |
| H | 2.8113424185  | 1.1912675158  | -2.4376991514 |
| C | -0.2855122884 | -0.4402713713 | -0.2854460907 |
| C | -0.5902247313 | -1.3675483811 | 0.6405674963  |
| C | 0.081959557   | -0.8170359118 | -1.6872901454 |
| C | -0.6249408156 | -2.8003417368 | 0.3959998453  |
| O | -0.2708020762 | 0.116226376   | -2.6000244051 |
| O | 0.5820855302  | -1.8840488504 | -1.9962186396 |
| C | 0.0102167137  | -0.2175087704 | -3.9740059461 |
| O | 0.4811245366  | -3.4242130734 | 0.8912755254  |
| O | -1.5793769968 | -3.4244124244 | -0.0538278029 |
| C | 0.4769239798  | -4.8563522344 | 0.7967745927  |
| H | -0.3107416809 | 0.6459100552  | -4.556841027  |
| H | 1.0779587679  | -0.3977912587 | -4.1197233141 |
| H | -0.5503767146 | -1.1058222395 | -4.2754964244 |
| H | 1.4143448827  | -5.1863792251 | 1.2475591025  |
| H | -0.3690601975 | -5.2878866611 | 1.3396103856  |
| H | 0.432717325   | -5.1834659743 | -0.2462613931 |

### TS3(1b\_t2)

|   |               |              |              |
|---|---------------|--------------|--------------|
| C | -0.2994881478 | 1.8178358662 | 0.5909955296 |
| N | -0.4635404388 | 3.1063085381 | 0.9728886355 |
| N | 0.9049578185  | 1.3101987106 | 0.3689066314 |
| C | -1.737204071  | 3.6908962421 | 1.3943807523 |
| H | 0.3758411366  | 3.6227726074 | 1.1909406873 |
| C | -2.6265443806 | 2.5796074513 | 1.9291967625 |

|   |               |               |               |
|---|---------------|---------------|---------------|
| H | -1.5217818846 | 4.4406693491  | 2.158653803   |
| H | -2.2214339907 | 4.1974331878  | 0.5500304426  |
| C | -2.7338249302 | 1.485480827   | 0.8768385256  |
| H | -2.2079537404 | 2.1808936396  | 2.8597037572  |
| H | -3.6281213752 | 2.9627278469  | 2.1429615729  |
| N | -1.3996329599 | 1.0138946786  | 0.4264769556  |
| H | -3.2660178756 | 0.6228385052  | 1.2843872281  |
| H | -3.2982248061 | 1.8518953174  | 0.0152640678  |
| C | 2.1283742499  | 2.0971366844  | 0.496296636   |
| H | 2.1299323634  | 2.9416261951  | -0.2048492684 |
| H | 2.2134065417  | 2.5182759161  | 1.5102527987  |
| C | 3.3329701095  | 1.2675867896  | 0.2060650025  |
| C | 4.2819460419  | 1.3066059603  | -0.7721418409 |
| C | 5.2059763218  | 0.2445775192  | -0.4898644616 |
| C | 4.748622534   | -0.3640587756 | 0.6375322036  |
| O | 3.6094668966  | 0.2472508324  | 1.0794978982  |
| H | 5.0949261696  | -1.2007411553 | 1.2260063853  |
| H | 6.0876464835  | -0.026358701  | -1.0537177475 |
| H | 4.3172448426  | 2.0065921906  | -1.5954074081 |
| H | 0.8135142048  | 0.1467129954  | 0.2144927546  |
| C | -1.2722070848 | -0.3537473092 | -0.0181269139 |
| C | -0.0926784028 | -0.9973904092 | -0.0308791108 |
| C | -2.5018870163 | -0.9808336367 | -0.608812617  |
| C | 0.1047641177  | -2.3259704585 | -0.5822010784 |
| O | 0.3048809969  | -3.2546787929 | 0.3979447549  |
| O | 0.2240340119  | -2.6036064887 | -1.7710454786 |
| C | 0.6163831447  | -4.5785995731 | -0.06010484   |
| O | -3.1782511785 | -0.1350211964 | -1.4166827563 |
| O | -2.8151674405 | -2.1480693109 | -0.4605236424 |
| C | -4.3414795966 | -0.6856412868 | -2.0681241081 |
| H | 0.7473969103  | -5.1810537491 | 0.8403804406  |
| H | -0.196352481  | -4.9902613127 | -0.6658077944 |
| H | 1.5372821484  | -4.5879631261 | -0.6504835277 |
| H | -4.7590021963 | 0.1291368415  | -2.659629197  |
| H | -4.0603830288 | -1.5186173883 | -2.716960596  |
| H | -5.0708350178 | -1.0304620213 | -1.3308738386 |

## 12b\_t1

|   |               |              |               |
|---|---------------|--------------|---------------|
| C | -0.8735290925 | 1.1841783448 | 1.032493758   |
| N | -1.7886006581 | 2.1829382048 | 0.8460702205  |
| N | -0.2756170154 | 0.7476263721 | -0.2044985266 |
| C | -2.5168276482 | 2.751995238  | 1.9794870413  |
| H | -2.1845550334 | 2.2874163899 | -0.0786044796 |
| C | -1.6613997941 | 2.605917529  | 3.2368698197  |
| H | -2.7298981281 | 3.8039583568 | 1.7654365705  |
| H | -3.4786002082 | 2.2380549673 | 2.1120019145  |
| C | -1.1529673021 | 1.164771525  | 3.3562259957  |
| H | -0.806337168  | 3.2895345392 | 3.1780913442  |
| H | -2.2476196524 | 2.883775185  | 4.1180284482  |
| N | -0.478384516  | 0.6806500625 | 2.1434944873  |

|   |               |               |               |
|---|---------------|---------------|---------------|
| H | -0.4455766435 | 1.0812673648  | 4.1886244743  |
| H | -1.9883788466 | 0.4901438792  | 3.5932101398  |
| H | -1.1927817924 | -1.4452811273 | 1.1378967053  |
| C | 0.5266522586  | 1.7665423694  | -0.9343630416 |
| H | 0.6029085659  | 1.4694962701  | -1.9797221809 |
| H | -0.0332988799 | 2.7024843015  | -0.9127166122 |
| C | 1.8900736073  | 2.0033773925  | -0.3684762187 |
| C | 3.1017348897  | 1.3930735009  | -0.5233592558 |
| C | 4.0268492261  | 2.0995525041  | 0.3131017935  |
| C | 3.3128089034  | 3.0891246946  | 0.9171159115  |
| O | 2.0103637328  | 3.0477649055  | 0.5146800627  |
| H | 3.567699917   | 3.8711937997  | 1.616865425   |
| H | 5.0811260291  | 1.8977347317  | 0.4420524849  |
| H | 3.2999364109  | 0.5368214077  | -1.1514174046 |
| C | -0.2723249918 | -0.5779467709 | -0.5701236258 |
| C | -0.8037615181 | -1.6102481543 | 0.1440866917  |
| C | 0.3659682     | -0.8609104022 | -1.9245982015 |
| C | -0.8579537544 | -2.9635194063 | -0.3861350727 |
| O | -0.5296774642 | -0.7281215534 | -2.906575967  |
| O | 1.5462102592  | -1.0940736174 | -2.0781092962 |
| C | -0.0465252993 | -1.008938569  | -4.240887479  |
| O | -1.4343502697 | -3.8059569078 | 0.5104195346  |
| O | -0.4537096515 | -3.3483676338 | -1.4789263607 |
| C | -1.5419981034 | -5.1776225358 | 0.0963364317  |
| H | -0.8974824237 | -0.8388072918 | -4.899456562  |
| H | 0.7760337902  | -0.3390872116 | -4.5006335143 |
| H | 0.2850986997  | -2.0472247709 | -4.3064614962 |
| H | -2.0234284153 | -5.6988713142 | 0.9245227632  |
| H | -2.151234992  | -5.2673571325 | -0.8072997254 |
| H | -0.5549662279 | -5.6080414367 | -0.0936789972 |

#### E-12b\_t1

|   |               |               |               |
|---|---------------|---------------|---------------|
| C | -1.2465179676 | 0.9773138589  | 0.4205094631  |
| N | -1.065576942  | 2.2918961662  | 0.7852352617  |
| N | -0.2215934505 | 0.4119929326  | -0.3641363047 |
| C | -2.1089941119 | 2.9265196778  | 1.6021367797  |
| H | -0.6306555278 | 2.8873513638  | 0.0902229008  |
| C | -3.4772337292 | 2.3360835025  | 1.2628785355  |
| H | -2.0682695536 | 4.0018630167  | 1.4163621922  |
| H | -1.88558859   | 2.7659273982  | 2.6644313506  |
| C | -3.3989063975 | 0.8112963511  | 1.3896418855  |
| H | -3.7472099895 | 2.616067054   | 0.2374427232  |
| H | -4.245581474  | 2.7368760187  | 1.9319658917  |
| N | -2.2303043602 | 0.2073955554  | 0.7454789817  |
| H | -4.297486061  | 0.3485175806  | 0.962679806   |
| H | -3.3929521481 | 0.5317539291  | 2.4536531883  |
| H | -0.2226710153 | -2.5425348409 | -2.0377467978 |
| C | 1.1218579378  | 1.0257535625  | -0.4543902217 |
| H | 1.8700990456  | 0.2361275807  | -0.4551838092 |
| H | 1.2730412691  | 1.6070392844  | 0.4579876558  |



|   |               |               |               |
|---|---------------|---------------|---------------|
| C | 1.306216071   | 1.8852612972  | -1.6598550073 |
| C | 2.0122536553  | 1.7437694416  | -2.8175687623 |
| C | 1.776667139   | 2.9283376384  | -3.5942516311 |
| C | 0.9421152769  | 3.708097972   | -2.856469829  |
| O | 0.6466985797  | 3.0920418155  | -1.6712446104 |
| H | 0.4909464657  | 4.676517351   | -3.0125309243 |
| H | 2.1782485858  | 3.1641031654  | -4.5699031552 |
| H | 2.6279841958  | 0.8962469294  | -3.0849136881 |
| C | -0.5628380401 | -0.7063257446 | -1.1232841593 |
| C | 0.1619830863  | -1.8379915435 | -1.3108734795 |
| C | -1.8476828193 | -0.6359716955 | -1.9291325298 |
| C | 1.3456832282  | -2.2856073285 | -0.5698995631 |
| O | -2.1012237382 | 0.6110785868  | -2.3534731065 |
| O | -2.50844049   | -1.6078023986 | -2.2388093902 |
| C | -3.2926161655 | 0.7675109199  | -3.1517100667 |
| O | 1.7626262747  | -3.4800653357 | -1.0502622008 |
| O | 1.8923735293  | -1.7258924803 | 0.371165638   |
| C | 2.8881912324  | -4.0694492623 | -0.373379558  |
| H | -3.3418407681 | 1.8277371359  | -3.3982909184 |
| H | -3.2254533256 | 0.1683613655  | -4.0628471339 |
| H | -4.1761501577 | 0.4684268757  | -2.5826051239 |
| H | 3.0852477831  | -5.0067568803 | -0.8938447178 |
| H | 3.7613671396  | -3.4144921173 | -0.430843832  |
| H | 2.6510343274  | -4.2637627001 | 0.6759322671  |

## 12b\_t2

|   |               |               |               |
|---|---------------|---------------|---------------|
| C | -0.1368919183 | 1.8124300546  | 0.5445950496  |
| N | -0.3761077546 | 2.9396250881  | 1.2875447046  |
| N | 1.0331062416  | 1.3598443854  | 0.24333247    |
| C | -1.6566214882 | 3.5536388907  | 1.6494462071  |
| H | 0.4293967233  | 3.5317126146  | 1.4308903245  |
| C | -2.8108367945 | 2.6132492162  | 1.3341016015  |
| H | -1.6350425517 | 3.8159810999  | 2.7125460641  |
| H | -1.7763976418 | 4.4855434593  | 1.0816209612  |
| C | -2.5220170613 | 1.9461672973  | -0.002636085  |
| H | -2.9183892803 | 1.8409047382  | 2.1026953612  |
| H | -3.7453750926 | 3.179352708   | 1.2872976652  |
| N | -1.3002927252 | 1.1155973342  | 0.1143117406  |
| H | -3.3551350378 | 1.3295300416  | -0.3269079238 |
| H | -2.3587026859 | 2.6982016676  | -0.7833757711 |
| C | 2.196033436   | 2.0507260466  | 0.7904029003  |
| H | 2.2877940834  | 3.0793532968  | 0.4070051235  |
| H | 2.1282977273  | 2.138005921   | 1.8887604432  |
| C | 3.4637978679  | 1.3460479794  | 0.4339319163  |
| C | 4.558506118   | 1.702676358   | -0.2977188516 |
| C | 5.4638609402  | 0.5879149736  | -0.2580252135 |
| C | 4.8524026561  | -0.3661971221 | 0.4941959371  |
| O | 3.6344073826  | 0.0782351811  | 0.9272023015  |
| H | 5.1288578269  | -1.3637028447 | 0.8021407094  |
| H | 6.4343702041  | 0.511301408   | -0.7284846957 |

H 4.7020788016 2.6461945943 -0.8061644001  
H 0.7195934344 -0.7303289341 -0.1980670981  
C -1.3406523129 -0.2424054651 -0.1531625043  
C -0.2894559313 -1.1023330616 -0.2629384794  
C -2.7541812384 -0.8080692556 -0.2389142776  
C -0.4854816946 -2.5363059854 -0.4469549114  
O 0.7122259447 -3.1616246746 -0.5837703404  
O -1.5480669541 -3.1476638967 -0.4792087788  
C 0.655097304 -4.585637595 -0.7676709211  
O -3.1456765367 -0.9546799359 -1.507990309  
O -3.4410929407 -1.0215222319 0.7377789483  
C -4.4488136272 -1.5500312425 -1.6963798497  
H 1.6918888189 -4.915058856 -0.8439017572  
H 0.1691518567 -5.0712689337 0.0830050132  
H 0.113338495 -4.840757259 -1.682664967  
H -4.5997739624 -1.5850035524 -2.7748060229  
H -4.4613690984 -2.5580694193 -1.2766379272  
H -5.2235925338 -0.941860089 -1.2239033575

#### **E-12b\_t2**

C 0.212151242 0.4067795676 0.6131563406  
N 0.3960848261 1.4925028836 1.4268876498  
N 1.1285366406 -0.1993247743 -0.0820603624  
C -0.6795245422 2.2469487124 2.0703430935  
H 1.2586804255 1.9975155193 1.2817863879  
C -1.8169970318 1.2998923992 2.4232711204  
H -0.2695069132 2.723349129 2.9656021833  
H -1.0472648675 3.0441689752 1.4083210114  
C -2.2339835048 0.5255081087 1.1813733257  
H -1.4965708477 0.6021484079 3.2041376891  
H -2.6714483203 1.8683359149 2.8015867221  
N -1.065306554 -0.1518942919 0.5848151067  
H -2.9729129805 -0.2341410508 1.4322036382  
H -2.6784604755 1.2052016083 0.4411181898  
C 2.5007217572 0.2658742205 -0.0047065104  
H 2.8085650737 0.5101602908 1.0276267821  
H 3.1561498046 -0.5609865977 -0.3114833503  
C 2.8077125979 1.4462016419 -0.8871103229  
C 2.0760189733 2.2178377291 -1.7419356981  
C 2.9837889632 3.1806330871 -2.3054773112  
C 4.1996688359 2.9236900672 -1.7555764802  
O 4.1122454936 1.868265312 -0.8873253729  
H 5.1780131467 3.3683477291 -1.8623375645  
H 2.7543531223 3.9558037486 -3.0236964064  
H 1.021413865 2.1124600985 -1.9466968508  
H -2.028021772 -3.0627179167 -0.8722284541  
C -1.2754789487 -1.2030357038 -0.3261764427  
C -1.833336637 -2.3980688441 -0.0386801408  
C -0.9731679877 -0.958577021 -1.7903196928  
C -2.1913652239 -3.0034184264 1.2596302296

|   |               |               |               |
|---|---------------|---------------|---------------|
| O | -1.8870706324 | -2.2622770412 | 2.3413790792  |
| O | -2.6991027662 | -4.1120612164 | 1.3313626594  |
| C | -2.1869601251 | -2.8704277573 | 3.6149805534  |
| O | -1.1772749932 | 0.3257076499  | -2.1281364015 |
| O | -0.6899468056 | -1.8332464786 | -2.5852627303 |
| C | -0.9854016212 | 0.6361425171  | -3.5243246136 |
| H | -1.8748817395 | -2.1450766309 | 4.3657731658  |
| H | -3.257213699  | -3.0716329545 | 3.7035822519  |
| H | -1.6310517403 | -3.8032828716 | 3.7357218953  |
| H | -1.2056756685 | 1.6988130586  | -3.6216827186 |
| H | 0.0446996721  | 0.4315980981  | -3.8246296135 |
| H | -1.669070042  | 0.0500891026  | -4.1432840372 |

#### TS4<sub>sc</sub>(1b\_t1)

|   |               |               |               |
|---|---------------|---------------|---------------|
| C | -0.7848726758 | 1.2373986389  | 0.423895494   |
| N | -0.3912331158 | 2.3689176981  | 1.0390995579  |
| N | 0.1458001859  | 0.290284674   | -0.0171275185 |
| C | -1.3791048009 | 3.4279839845  | 1.3052945173  |
| H | 0.5715932381  | 2.6642714769  | 0.9465600839  |
| C | -2.7623045893 | 2.8143657699  | 1.5182014379  |
| H | -1.0531280785 | 3.9749663598  | 2.1932969072  |
| H | -1.3964572937 | 4.1300597804  | 0.4625343607  |
| C | -3.1063254529 | 1.8433993215  | 0.3828775019  |
| H | -2.7828089184 | 2.2778605223  | 2.473030477   |
| H | -3.5067149759 | 3.6138984968  | 1.5692645905  |
| N | -2.015819047  | 0.897017816   | 0.1897347087  |
| H | -4.01223282   | 1.2803305942  | 0.6244965619  |
| H | -3.2938418899 | 2.3842069578  | -0.5537710759 |
| H | -0.7049469727 | -2.3871620253 | -1.905491762  |
| C | 1.5930630946  | 0.4459014204  | 0.2448008286  |
| H | 2.0244036716  | -0.5530692095 | 0.2672641324  |
| H | 1.7074099199  | 0.886121477   | 1.238810553   |
| C | 2.3168242693  | 1.2464998655  | -0.7837760774 |
| C | 3.148195975   | 0.91274671    | -1.8114997458 |
| C | 3.5319340514  | 2.1414317335  | -2.4460904967 |
| C | 2.9059948392  | 3.1363303198  | -1.7615125068 |
| O | 2.1615387763  | 2.61197083    | -0.7415225839 |
| H | 2.8851213393  | 4.2114909112  | -1.8587444301 |
| H | 4.1869280252  | 2.2635746484  | -3.2973843984 |
| H | 3.4500829087  | -0.0901841725 | -2.0772115362 |
| C | -0.445923043  | -0.713300275  | -0.7559597026 |
| C | 0.0401562475  | -1.845530949  | -1.3334290456 |
| C | -1.950895114  | -0.4021054363 | -1.0369534854 |
| C | 1.3451347139  | -2.4977775644 | -1.3397252216 |
| O | -2.2682008632 | 0.0498551852  | -2.1535174943 |
| O | -2.7075864641 | -1.4329433877 | -0.448363116  |
| O | 1.3304555872  | -3.5155560769 | -2.2397244064 |
| O | 2.3429004266  | -2.2665597752 | -0.6604308608 |
| C | 2.5378426089  | -4.2894994168 | -2.3318889595 |
| H | 2.3341586655  | -5.0636489404 | -3.0723921506 |

|   |               |               |               |
|---|---------------|---------------|---------------|
| H | 3.3760147256  | -3.6687349929 | -2.6600636433 |
| H | 2.7849612044  | -4.7456576589 | -1.3695602383 |
| C | -4.0244049101 | -1.5776800912 | -0.9780424394 |
| H | -4.4443320221 | -2.4660628631 | -0.4996275925 |
| H | -4.6612894421 | -0.715309702  | -0.745378313  |
| H | -4.0109749847 | -1.7160726549 | -2.0632939122 |

#### TS4<sub>sc</sub>(1b\_t2)

|   |               |               |               |
|---|---------------|---------------|---------------|
| C | 0.2375888805  | 0.6836892289  | 0.602319961   |
| N | 0.6402785687  | 1.6244387006  | 1.4767676606  |
| N | 0.8521370176  | 0.3024103329  | -0.4741810795 |
| C | -0.1221805755 | 2.0790114579  | 2.6456145691  |
| H | 1.391229827   | 2.2243693367  | 1.1575316045  |
| C | -1.1182434295 | 1.007545836   | 3.068548603   |
| H | 0.5868323611  | 2.3014324854  | 3.4477626323  |
| H | -0.64867162   | 3.0084846551  | 2.3945202156  |
| C | -1.8913369937 | 0.4966904798  | 1.8572991118  |
| H | -0.5984086588 | 0.1692886056  | 3.5452142306  |
| H | -1.8158677353 | 1.429057487   | 3.7974093056  |
| N | -0.9398438149 | -0.0288764407 | 0.8593912184  |
| H | -2.5621248084 | -0.3092763578 | 2.1399424367  |
| H | -2.4720311179 | 1.3048173834  | 1.3947360736  |
| C | 2.2497498373  | 0.5255055798  | -0.7891318177 |
| H | 2.861167355   | 0.4566775249  | 0.1231511997  |
| H | 2.551390047   | -0.2993425172 | -1.4442983755 |
| C | 2.5462702862  | 1.8135174504  | -1.4880461761 |
| C | 2.9977857259  | 2.1385257414  | -2.7326720743 |
| C | 3.0962851619  | 3.5716230811  | -2.7765723874 |
| C | 2.69745769    | 4.0192174363  | -1.5568765684 |
| O | 2.3616734281  | 2.9616023927  | -0.7540578124 |
| H | 2.5977803257  | 4.999351889   | -1.1152006533 |
| H | 3.420454772   | 4.1815929645  | -3.6082088534 |
| H | 3.2382198948  | 1.4403613784  | -3.522308287  |
| H | -1.9847861239 | -2.7552630753 | -0.8583111752 |
| C | -1.1509965816 | -1.0769866274 | -0.0146063559 |
| C | -2.018474881  | -2.1229571135 | 0.0221203533  |
| C | -0.2276303507 | -1.0209923849 | -1.2603513163 |
| C | -2.9086785991 | -2.6171280282 | 1.0680792956  |
| O | -3.672634983  | -3.6267866113 | 0.5754500995  |
| O | -2.9843502653 | -2.2686521382 | 2.2420951689  |
| C | -4.5562376295 | -4.2591135262 | 1.5162968132  |
| O | -0.9313986285 | -0.2640678679 | -2.2076919697 |
| O | 0.4785953051  | -1.9778496138 | -1.6001128106 |
| C | -0.3444108588 | -0.2319914607 | -3.507629532  |
| H | -5.0789699913 | -5.0333907396 | 0.9538399038  |
| H | -3.9942498396 | -4.7083836296 | 2.3396588356  |
| H | -5.273555948  | -3.5408179679 | 1.9221723264  |
| H | -1.0879174571 | 0.2196609052  | -4.1686665042 |
| H | 0.5633491138  | 0.3846454409  | -3.5194717404 |
| H | -0.0974397064 | -1.2374846737 | -3.8596831294 |

**TS4<sub>6c</sub>(1b\_t1)**

|   |               |               |               |
|---|---------------|---------------|---------------|
| C | -1.3336596986 | 0.8039537652  | 0.4285765502  |
| N | -0.8631186225 | 1.7834841357  | 1.2420840808  |
| N | -0.4162632431 | -0.1042726305 | -0.0684887119 |
| C | -1.793630094  | 2.743655358   | 1.8495761411  |
| C | -3.1335948577 | 2.057761004   | 2.1109108668  |
| H | -1.3319952896 | 3.1075869288  | 2.7691056024  |
| H | -1.9292845384 | 3.6001663925  | 1.1785853469  |
| C | -3.6416026337 | 1.4626696103  | 0.8024169077  |
| H | -3.0011559136 | 1.274489439   | 2.8658020437  |
| H | -3.8635253775 | 2.7760195818  | 2.495398359   |
| N | -2.6015649236 | 0.7030616166  | 0.1033214672  |
| H | -4.480218555  | 0.7776408081  | 0.9491251613  |
| H | -3.995110495  | 2.2625602182  | 0.1408619722  |
| C | 0.984684196   | 0.3350056739  | -0.31509294   |
| H | 1.3418870542  | -0.1709842535 | -1.2129085021 |
| H | 0.9456416895  | 1.4045338153  | -0.5473485951 |
| C | 1.981876757   | 0.0951691958  | 0.7724612875  |
| C | 3.2163945614  | -0.4792689175 | 0.7877672623  |
| C | 3.747419788   | -0.2871819841 | 2.108009048   |
| C | 2.8011255101  | 0.3915000147  | 2.8080151705  |
| O | 1.7183841176  | 0.642263595   | 2.0047859305  |
| H | 2.7288408156  | 0.7500078652  | 3.8235897573  |
| H | 4.7049994519  | -0.6197421765 | 2.4837863291  |
| H | 3.6881066349  | -0.9895527018 | -0.0399021818 |
| C | -0.9067144803 | -1.2732068633 | -0.7076011785 |
| C | -0.0335755551 | -2.4827957994 | -0.627165268  |
| C | -3.1414688747 | -0.2054217461 | -1.2039806605 |
| C | -2.1501353946 | -1.3479424404 | -1.2081917664 |
| O | -4.3634931372 | -0.4770857885 | -1.0650772263 |
| H | -2.5136588596 | -2.2894172245 | -1.602196451  |
| O | -0.3390701003 | -3.381871944  | -1.5801106918 |
| O | 0.8369134757  | -2.6526127329 | 0.2063160744  |
| C | 0.3812918194  | -4.6298667651 | -1.5151311663 |
| H | 0.0035770304  | -5.2272830067 | -2.344565285  |
| H | 1.4544100307  | -4.4593322221 | -1.6287978607 |
| H | 0.1912241987  | -5.1367802637 | -0.5658690286 |
| O | -2.7379234379 | 0.6158684307  | -2.3381545997 |
| C | -3.7380412205 | 1.4995987332  | -2.8213385926 |
| H | -3.4695108838 | 1.7589892963  | -3.8506835319 |
| H | -4.7249272956 | 1.0260209314  | -2.8067267265 |
| H | -3.789148215  | 2.4293966724  | -2.2344781965 |
| H | -0.0217174345 | 1.5709673784  | 1.7655728022  |

**TS4<sub>6c</sub>(1b\_t2)**

|   |               |              |               |
|---|---------------|--------------|---------------|
| C | -0.7801629908 | 0.9263013722 | 0.2111980959  |
| N | -0.5258644377 | 1.9606411357 | 1.0467675229  |
| N | 0.2074765446  | 0.1934701273 | -0.2977098809 |
| C | -1.5696810737 | 2.7625666651 | 1.6890583435  |

|   |               |               |               |
|---|---------------|---------------|---------------|
| C | -2.7825019579 | 1.8762047711  | 1.9258100676  |
| H | -1.1560504162 | 3.1482937226  | 2.6223204878  |
| H | -1.8343440428 | 3.6175363639  | 1.0549934821  |
| C | -3.21905131   | 1.2813890954  | 0.5966624353  |
| H | -2.5303177965 | 1.0885616719  | 2.6438538577  |
| H | -3.6122669562 | 2.4585715504  | 2.3355905032  |
| N | -2.0778766382 | 0.6633477788  | -0.135543872  |
| H | -3.9672826488 | 0.5013117302  | 0.75338576    |
| H | -3.6615443724 | 2.0522444444  | -0.0361880358 |
| C | 1.6020403931  | 0.5365347395  | -0.0188871275 |
| H | 2.1822967459  | -0.0217846095 | -0.757087697  |
| H | 1.7769215873  | 1.6006959142  | -0.2142596601 |
| C | 2.0742515276  | 0.2183728607  | 1.3741564614  |
| C | 1.9522396473  | -0.8628995683 | 2.1965680236  |
| C | 2.6793653171  | -0.5490796147 | 3.393532171   |
| C | 3.1918516029  | 0.6989675552  | 3.2153207321  |
| O | 2.830654445   | 1.187682405   | 1.9899399315  |
| H | 3.7976091182  | 1.3529202699  | 3.8249660826  |
| H | 2.8019785157  | -1.171650921  | 4.2692388555  |
| H | 1.3959284858  | -1.755254292  | 1.9466127527  |
| C | -0.0729017109 | -1.3515740064 | -0.8509058179 |
| O | 0.0285421642  | -2.2298845782 | 0.0525860377  |
| C | -2.3480550148 | -0.3147511201 | -1.1252419135 |
| C | -1.4266961759 | -1.2159961388 | -1.5022495424 |
| C | -3.634350949  | -0.1880086242 | -1.8719761836 |
| O | -4.0327058741 | -1.3686747849 | -2.3787243676 |
| O | -4.2407384581 | 0.8555113279  | -2.0436753096 |
| C | -5.1972040533 | -1.3220763588 | -3.229296712  |
| H | -5.3620624497 | -2.3495941012 | -3.5524455804 |
| H | -6.0634156939 | -0.9558867731 | -2.6734038151 |
| H | -5.0187375456 | -0.6772453304 | -4.0932650495 |
| H | -1.6629117979 | -1.9204148538 | -2.2904092797 |
| H | 0.3910277322  | 1.9917835932  | 1.4668290874  |
| O | 0.9013273349  | -1.3844393531 | -1.939142335  |
| C | 1.6205553355  | -2.6067662891 | -2.0381723774 |
| H | 0.9710022121  | -3.4516895879 | -2.30740394   |
| H | 2.3540216097  | -2.4630522182 | -2.8374586606 |
| H | 2.1430050449  | -2.862037971  | -1.1110885336 |

### 13b\_t1

|   |               |              |              |
|---|---------------|--------------|--------------|
| C | -0.8442405877 | 1.067272046  | 0.9018406646 |
| N | -0.5490521434 | 2.1796778543 | 1.5829139965 |
| N | 0.1084319045  | 0.1146287825 | 0.5562786547 |
| C | -1.6265211298 | 3.1220669938 | 1.9201594589 |
| H | 0.409207771   | 2.4989131924 | 1.6381912886 |
| C | -2.9190507317 | 2.3435768181 | 2.1724017171 |
| H | -1.3166111207 | 3.6708100564 | 2.8117052757 |
| H | -1.7605335495 | 3.8421559572 | 1.1035226609 |
| C | -3.2463437771 | 1.4408361854 | 0.9779269698 |
| H | -2.8037796876 | 1.7355010115 | 3.0760126322 |

|   |               |               |               |
|---|---------------|---------------|---------------|
| H | -3.7392789171 | 3.0458556862  | 2.3421549097  |
| N | -2.0532662856 | 0.7243090621  | 0.5469150011  |
| H | -3.9881933213 | 0.6812421119  | 1.2426531504  |
| H | -3.6418536048 | 2.02906979    | 0.1419569122  |
| H | -0.8129146071 | -2.7914975966 | -0.9164299149 |
| C | 1.5233897583  | 0.2546190965  | 0.9697487365  |
| H | 1.9616034131  | -0.7385384026 | 0.9179834829  |
| H | 1.5405521585  | 0.5918099847  | 2.0106471853  |
| C | 2.3274993703  | 1.167038075   | 0.1072697905  |
| C | 3.1621275887  | 0.9635611256  | -0.9509439684 |
| C | 3.6345079829  | 2.2560788295  | -1.3572388345 |
| C | 3.054256192   | 3.1569804072  | -0.5193237217 |
| O | 2.2549262561  | 2.5131082029  | 0.3844359528  |
| H | 3.1034700531  | 4.2316120082  | -0.4266838006 |
| H | 4.3179199462  | 2.4807659922  | -2.1641803923 |
| H | 3.4061140215  | 0.0026793896  | -1.3802869531 |
| C | -0.4956321907 | -0.9775792562 | -0.0390897363 |
| C | -0.0254699987 | -2.1512590848 | -0.534235422  |
| C | -2.0561046182 | -0.7643793763 | -0.064694072  |
| C | 1.3111411924  | -2.7095060127 | -0.6940862514 |
| O | -2.3568210741 | -0.5673725294 | -1.4708541317 |
| O | -2.7753622189 | -1.564919786  | 0.593025096   |
| C | -3.7221211194 | -0.7600817615 | -1.8127251442 |
| O | 1.2243215901  | -3.9013669736 | -1.3410251754 |
| O | 2.3984602089  | -2.256134388  | -0.343263688  |
| C | 2.4689668145  | -4.5808595404 | -1.5733124478 |
| H | -3.7612416882 | -0.880986769  | -2.899832119  |
| H | -4.1326344149 | -1.6522165827 | -1.3299012799 |
| H | -4.3483956381 | 0.1026339789  | -1.539572569  |
| H | 2.2063144909  | -5.5083158203 | -2.083331275  |
| H | 3.1307196782  | -3.980827757  | -2.2038034478 |
| H | 2.9760230334  | -4.8016770009 | -0.6301661912 |

### 13b\_t2

|   |               |               |               |
|---|---------------|---------------|---------------|
| C | 0.4920823315  | 0.7441398694  | 0.7633162401  |
| N | 0.8849801566  | 1.7118931578  | 1.5951419696  |
| N | 1.0875203182  | 0.3884718174  | -0.3518609176 |
| C | 0.1841953594  | 2.0815587786  | 2.8326129614  |
| H | 1.6014524856  | 2.3410062394  | 1.2516869454  |
| C | -0.6738749196 | 0.9165357813  | 3.3101582364  |
| H | 0.9379542752  | 2.3519339786  | 3.5762037485  |
| H | -0.4371896301 | 2.96457041    | 2.6418518295  |
| C | -1.5104388838 | 0.3609886221  | 2.1611171237  |
| H | -0.0398069168 | 0.1219225371  | 3.7181467752  |
| H | -1.3370210459 | 1.2604129934  | 4.1083189374  |
| N | -0.6157957494 | -0.0357205573 | 1.0562075954  |
| H | -2.0726065786 | -0.5199883312 | 2.4612152293  |
| H | -2.2118190672 | 1.1170548764  | 1.7873089134  |
| C | 2.4909545715  | 0.6197782787  | -0.6678777458 |
| H | 3.0917435614  | 0.5585911628  | 0.2499079821  |

|   |               |               |               |
|---|---------------|---------------|---------------|
| H | 2.779777124   | -0.2206918201 | -1.307110197  |
| C | 2.7751162528  | 1.9060358022  | -1.3686129139 |
| C | 3.2512368156  | 2.2344705122  | -2.6026436432 |
| C | 3.335807182   | 3.6683276111  | -2.6458754657 |
| C | 2.9052031499  | 4.1133839231  | -1.4361818824 |
| O | 2.563043173   | 3.0531385696  | -0.6395392246 |
| H | 2.7844126163  | 5.0929030657  | -0.9985515882 |
| H | 3.6718161862  | 4.2805571012  | -3.4710528576 |
| H | 3.5164242634  | 1.5381803156  | -3.3858356194 |
| H | -1.4522145558 | -2.7253230454 | -0.821335766  |
| C | -0.7635059645 | -1.062088996  | 0.1434257316  |
| C | -1.6010769558 | -2.1265375383 | 0.0707237928  |
| C | 0.2817120611  | -0.8942993822 | -1.0101047109 |
| C | -2.6221693619 | -2.6505826885 | 0.9715642391  |
| O | -3.2839588981 | -3.6674692683 | 0.3582869847  |
| O | -2.8913137742 | -2.3171997751 | 2.1214175829  |
| C | -4.2958918941 | -4.3187414708 | 1.1433853964  |
| O | -0.5093884758 | -0.3047547096 | -2.0688301896 |
| O | 1.0577305734  | -1.841860163  | -1.2962043727 |
| C | 0.130784573   | -0.2776406943 | -3.336527074  |
| H | -4.7055070536 | -5.1014689373 | 0.5040398867  |
| H | -3.8667556255 | -4.7594246738 | 2.0474027638  |
| H | -5.0838349851 | -3.615803933  | 1.4271069353  |
| H | -0.6474098714 | -0.0802049823 | -4.0801032405 |
| H | 0.882964809   | 0.522258487   | -3.4013826205 |
| H | 0.6151213681  | -1.233640924  | -3.5597067711 |

#### 14b\_t1

|   |               |               |               |
|---|---------------|---------------|---------------|
| C | -1.2435133602 | 0.8550428915  | 0.516987055   |
| N | -0.7341035826 | 1.8292671506  | 1.3047696922  |
| N | -0.364642454  | -0.0656409531 | -0.0167605524 |
| C | -1.5924513067 | 2.846848187   | 1.9227411596  |
| C | -2.9576494023 | 2.2382896391  | 2.2239768469  |
| H | -1.0871640429 | 3.1911164301  | 2.8268256523  |
| H | -1.696304758  | 3.7035999205  | 1.2463387067  |
| C | -3.516565544  | 1.6375945176  | 0.9426003741  |
| H | -2.8539786826 | 1.4693625726  | 2.9976906316  |
| H | -3.6436312486 | 3.0033119987  | 2.5985121569  |
| N | -2.5378319812 | 0.7838768524  | 0.2580489679  |
| H | -4.3914528903 | 1.0093210455  | 1.1203559198  |
| H | -3.8187737575 | 2.4307242721  | 0.2485914778  |
| C | 1.0730338187  | 0.3090882483  | -0.1839575147 |
| H | 1.4531031567  | -0.2539156045 | -1.033083584  |
| H | 1.1062006055  | 1.3680033995  | -0.4572516573 |
| C | 1.9836690332  | 0.0757674555  | 0.9805803389  |
| C | 2.9214296527  | -0.8643619333 | 1.2879810168  |
| C | 3.5291424643  | -0.4632413044 | 2.5240231707  |
| C | 2.9223710929  | 0.6957681447  | 2.8923015045  |
| O | 1.9858384185  | 1.0486515424  | 1.9596258002  |
| H | 3.029083181   | 1.3654338018  | 3.7323537828  |



|   |               |               |               |
|---|---------------|---------------|---------------|
| H | 4.314131001   | -0.9742481201 | 3.0637680542  |
| H | 3.1413555882  | -1.7452461341 | 0.7051860526  |
| C | -0.8974118506 | -1.1534083128 | -0.7645864464 |
| C | -0.0310721833 | -2.3578973746 | -0.9211264225 |
| C | -3.1785074371 | -0.0693885798 | -0.9355928388 |
| C | -2.1711193429 | -1.1655882859 | -1.1904863502 |
| O | -4.3611258857 | -0.4443383699 | -0.6830584832 |
| H | -2.5491987814 | -2.0421767684 | -1.7011604159 |
| O | -0.4647136921 | -3.1604442438 | -1.9089813374 |
| O | 0.9452809721  | -2.6091519854 | -0.2365808905 |
| C | 0.2588493941  | -4.3976176065 | -2.0724222018 |
| H | -0.2247004311 | -4.908213689  | -2.9047844418 |
| H | 1.3076775927  | -4.200505802  | -2.3057726194 |
| H | 0.1942817114  | -5.0050970478 | -1.1664638775 |
| O | -3.0123120665 | 0.9311412887  | -2.0317259677 |
| C | -3.959648096  | 0.7869260971  | -3.0746036394 |
| H | -3.8962230387 | 1.6878357143  | -3.6948653881 |
| H | -3.7531540663 | -0.0837866302 | -3.7187677553 |
| H | -4.9782195643 | 0.6883248082  | -2.6842693512 |
| H | 0.1626887638  | 1.6667217674  | 1.7453033739  |

#### 14b\_t2

|   |               |               |               |
|---|---------------|---------------|---------------|
| C | -0.6788861167 | 0.9367305257  | 0.1698068309  |
| N | -0.3939898309 | 1.9970884213  | 0.9584466751  |
| N | 0.2929168124  | 0.1438213546  | -0.2822332612 |
| C | -1.40063772   | 2.8792202839  | 1.5501499644  |
| C | -2.6596386177 | 2.0674758677  | 1.8028017133  |
| H | -0.9799358909 | 3.2788447053  | 2.4747849881  |
| H | -1.611570502  | 3.7213882244  | 0.8794744655  |
| C | -3.1001102885 | 1.4280622298  | 0.4962500173  |
| H | -2.4626451041 | 1.3045944881  | 2.563529585   |
| H | -3.4661681221 | 2.7106024083  | 2.164986009   |
| N | -1.9831234392 | 0.7024365473  | -0.1720273772 |
| H | -3.8961446656 | 0.7041056107  | 0.6784596393  |
| H | -3.4841579428 | 2.1861830769  | -0.1886293953 |
| C | 1.6962111668  | 0.3856839638  | 0.0831576216  |
| H | 2.2660459899  | -0.2815290804 | -0.563288063  |
| H | 1.9821935866  | 1.4094572593  | -0.1820080001 |
| C | 2.0466490863  | 0.1353897423  | 1.5199087728  |
| C | 2.1065597287  | -0.9781861527 | 2.3031331183  |
| C | 2.5085346998  | -0.5423838105 | 3.609890248   |
| C | 2.6606137708  | 0.8076435953  | 3.5349482409  |
| O | 2.3831623365  | 1.2430129955  | 2.2676739189  |
| H | 2.9511714801  | 1.5687782153  | 4.2436140396  |
| H | 2.6645643453  | -1.1553730862 | 4.4869045891  |
| H | 1.8632994992  | -1.9757113461 | 1.9685464059  |
| C | 0.0348606572  | -1.3240502276 | -0.887515199  |
| O | 0.3128768462  | -2.2608642282 | -0.0803317612 |
| C | -2.288003135  | -0.3582918519 | -1.062537197  |
| C | -1.3758683746 | -1.2787753197 | -1.4124175131 |

|   |               |               |               |
|---|---------------|---------------|---------------|
| C | -3.6090490238 | -0.3084996483 | -1.7556756106 |
| O | -4.0304554735 | -1.5361958877 | -2.1082486475 |
| O | -4.2203974724 | 0.7131268384  | -2.0175668341 |
| C | -5.2300581203 | -1.5787181123 | -2.9089744349 |
| H | -5.4087074587 | -2.6350558431 | -3.1082309413 |
| H | -6.0719412656 | -1.1487131958 | -2.3614242349 |
| H | -5.088170382  | -1.0346406505 | -3.8459591764 |
| H | -1.6516108028 | -2.0567596942 | -2.1133285374 |
| H | 0.5466552247  | 2.0818288509  | 1.3130192077  |
| O | 0.9001236827  | -1.2070691003 | -2.090836479  |
| C | 1.3936874587  | -2.4540014345 | -2.5509443046 |
| H | 2.152416039   | -2.2349476368 | -3.3094953213 |
| H | 1.8453910254  | -3.0371339076 | -1.7421795643 |
| H | 0.6087073128  | -3.0684249904 | -3.0207821976 |

### 15b\_t1

|   |               |               |               |
|---|---------------|---------------|---------------|
| C | -0.583517636  | 1.4158290082  | 0.0606155673  |
| N | -0.1730851595 | 2.5843815011  | 0.3738494269  |
| N | 0.2779537939  | 0.3751584111  | -0.3496501893 |
| C | -1.2153855007 | 3.5602663851  | 0.7261441184  |
| C | -2.5492641901 | 2.9430729623  | 1.1747344174  |
| H | -0.8233437869 | 4.2054831336  | 1.5204717589  |
| H | -1.3819585263 | 4.2125580066  | -0.1430932663 |
| C | -2.9893722371 | 1.8373522335  | 0.2109975371  |
| H | -2.4394204588 | 2.5167959688  | 2.1784397219  |
| H | -3.3217787496 | 3.7163456617  | 1.2260806183  |
| N | -1.8647519899 | 0.9157693123  | 0.0690032915  |
| H | -3.8461400292 | 1.2875153669  | 0.6116602133  |
| H | -3.2761981189 | 2.253789196   | -0.7624578011 |
| H | -0.9099867061 | -2.7425190837 | -0.9717207528 |
| C | 1.7329353718  | 0.5340141885  | -0.1938432054 |
| H | 2.2122967297  | -0.1171105051 | -0.9239160532 |
| H | 1.9591141364  | 1.5760681968  | -0.4207626056 |
| C | 2.22202683    | 0.2332624093  | 1.1843923125  |
| C | 2.6738550629  | 1.0181084628  | 2.2054557615  |
| C | 3.0060844104  | 0.1359998679  | 3.2872845022  |
| C | 2.7260360228  | -1.1214317285 | 2.8483235527  |
| O | 2.2502654241  | -1.0839876882 | 1.5688542042  |
| H | 2.8062160105  | -2.1017335243 | 3.2944783099  |
| H | 3.3987266887  | 0.4050332188  | 4.2580131043  |
| H | 2.7555788017  | 2.0959103013  | 2.1867583198  |
| C | -0.4318434919 | -0.7637489344 | -0.63670417   |
| C | -0.0837838035 | -2.0434033718 | -0.9378479567 |
| C | -1.9245753788 | -0.3664528638 | -0.5808918668 |
| C | 1.2205253351  | -2.6342921136 | -1.2231502605 |
| O | -2.4864677736 | -0.1308416137 | -1.8605177515 |
| O | -2.6434431329 | -1.3338938062 | 0.1198239464  |
| C | -2.6920044793 | -1.2530316523 | -2.7270393219 |
| O | 1.1386027087  | -3.9866773608 | -1.1264099877 |
| O | 2.2576881948  | -2.0745153408 | -1.5595763355 |

|   |               |               |               |
|---|---------------|---------------|---------------|
| C | 2.3371326637  | -4.7102864182 | -1.4520768509 |
| H | -3.288185476  | -0.8750261792 | -3.5603439578 |
| H | -1.7448207613 | -1.6441675676 | -3.1126792593 |
| H | -3.2416057307 | -2.0581183068 | -2.2296295975 |
| H | 2.0854171646  | -5.764633398  | -1.3330779809 |
| H | 2.6459336637  | -4.5119846989 | -2.4820853723 |
| H | 3.1522954825  | -4.4406513702 | -0.7753635334 |
| H | -3.5889313786 | -1.1270062664 | 0.019504392   |

#### **E-15b\_t1**

|   |               |               |               |
|---|---------------|---------------|---------------|
| C | -0.8956222044 | 1.6364364144  | 0.2315103859  |
| N | -0.6285635901 | 2.7897441417  | 0.7138861842  |
| N | 0.0917778353  | 0.7445106719  | -0.2408491551 |
| C | -1.7920476423 | 3.5834328009  | 1.1354778772  |
| C | -3.0234890743 | 2.7430306177  | 1.5042301872  |
| H | -1.4932109848 | 4.1971633981  | 1.9925413105  |
| H | -2.049303128  | 4.2856467818  | 0.3291675839  |
| C | -3.3403948467 | 1.7277977201  | 0.4017518486  |
| H | -2.8335488637 | 2.2071072102  | 2.4413100721  |
| H | -3.8897914509 | 3.3922834368  | 1.6633975741  |
| N | -2.106833023  | 1.0126464584  | 0.0846179417  |
| H | -4.0865004676 | 1.0022983434  | 0.7356549255  |
| H | -3.7310091084 | 2.2364413031  | -0.4891846746 |
| C | 1.5208661873  | 1.0564937303  | -0.1747279122 |
| H | 1.9696980621  | 0.8784467986  | -1.1560041439 |
| H | 1.5748880277  | 2.1266766224  | 0.0407185537  |
| C | 2.2822774536  | 0.2713885614  | 0.8433847336  |
| C | 3.3488949061  | -0.574665963  | 0.7529250083  |
| C | 3.6707927982  | -0.9725466786 | 2.0938032018  |
| C | 2.7741601917  | -0.3421184632 | 2.8997001608  |
| O | 1.9227089446  | 0.424997725   | 2.1562935961  |
| H | 2.6098769879  | -0.3317813271 | 3.9669246529  |
| H | 4.460189402   | -1.6403208327 | 2.4092807029  |
| H | 3.8456409758  | -0.8763404438 | -0.15888895   |
| C | -0.4653664856 | -0.3989678569 | -0.7333918327 |
| C | 0.2176809078  | -1.4673256918 | -1.2311576314 |
| C | -2.0014068305 | -0.2198947302 | -0.6660719019 |
| C | -0.4010174528 | -2.6913187634 | -1.701813673  |
| O | -2.4159129621 | -0.077902934  | -2.0181270132 |
| O | -2.6722963789 | -1.2267727615 | -0.001476657  |
| C | -3.7899529834 | -0.3503788686 | -2.3144297239 |
| O | 0.4981854746  | -3.4799905326 | -2.3241370686 |
| O | -1.5787251134 | -3.0504110671 | -1.5669267967 |
| C | 0.0133193094  | -4.7505285249 | -2.7981849086 |
| H | -3.9134889621 | -0.095582056  | -3.3696838877 |
| H | -4.0355858166 | -1.407235067  | -2.1733493279 |
| H | -4.4809136504 | 0.2588617717  | -1.7227132432 |
| H | 0.8763082937  | -5.2413865919 | -3.2482848953 |
| H | -0.3740896034 | -5.3513368249 | -1.9716128822 |
| H | -0.7726378601 | -4.6117877034 | -3.5446665452 |

H 1.29848022 -1.4335662666 -1.2796060235  
H -2.437631494 -2.0496955582 -0.5025056531

### 15b\_t2

C 0.4156191243 0.6411218109 0.8212510094  
N 0.8922562074 1.6171735584 1.4925749084  
N 1.028618435 0.0629125827 -0.267819319  
C 0.1190043956 2.0944574626 2.6434978784  
C -0.8811166045 1.0738688749 3.1935849094  
H 0.8250391258 2.3891184374 3.4284066816  
H -0.4105348448 3.0121805309 2.3487352188  
C -1.7111849404 0.4651633649 2.064330746  
H -0.345845229 0.2723116035 3.7164787298  
H -1.5513655576 1.549435974 3.9165130738  
N -0.7924970089 -0.0541258825 1.0402470032  
H -2.3376038789 -0.3539547097 2.4093048878  
H -2.3535978984 1.225637493 1.6012706154  
C 2.3029268767 0.5112213662 -0.7950659046  
H 3.0099731374 0.6074085125 0.0348412085  
H 2.6893930102 -0.2852696742 -1.4409690681  
C 2.2712815629 1.8229788828 -1.5306284063  
C 1.3878647267 2.4516620835 -2.3583811355  
C 2.008834876 3.6835754572 -2.7576198202  
C 3.2257240058 3.7117002762 -2.1506988734  
O 3.4019813235 2.5854071925 -1.3958594354  
H 4.0421186957 4.418441859 -2.1438922821  
H 1.5983428055 4.4431821007 -3.4086680419  
H 0.4152396283 2.0779354113 -2.6407030853  
H -1.6811745965 -2.7348914672 -0.8444008273  
C -0.9545502053 -1.0710188022 0.1392208879  
C -1.8405641135 -2.0969190983 0.0148607722  
C 0.1678283057 -0.8995466958 -0.910560347  
C -2.9295764874 -2.5328588538 0.8822023347  
O -3.6287945704 -3.5211368566 0.2636247886  
O -3.2182748534 -2.1536328574 2.0118369685  
C -4.7064406653 -4.0936379982 1.022790108  
O -0.2643557173 -0.2980959183 -2.1201302758  
O 0.7649379858 -2.1356650391 -1.1522326338  
C -1.1398844064 -1.0391869367 -2.9809883069  
H -5.1384332705 -4.8647365333 0.3841053593  
H -4.3377700985 -4.5386680716 1.9510173742  
H -5.4605146552 -3.3389960015 1.2620696667  
H -1.1580550307 -0.4891731921 -3.9240593718  
H -0.7708592708 -2.0526734773 -3.1653059697  
H -2.1555805073 -1.0882292728 -2.5754601326  
H 1.3334191826 -2.0420934961 -1.9360918939

### E-15b\_t2

C 0.4042799997 0.6701104158 0.7344845358  
N 0.8624043366 1.6230679668 1.4511528051

|   |               |               |               |
|---|---------------|---------------|---------------|
| N | 1.0406242001  | 0.0977739665  | -0.3412168638 |
| C | 0.0215220055  | 2.0577619279  | 2.5726904903  |
| C | -0.8608609382 | 0.9422842919  | 3.1412824478  |
| H | 0.6774366475  | 2.4473993678  | 3.3584457332  |
| H | -0.6051448439 | 2.9009092386  | 2.2462953825  |
| C | -1.6880972474 | 0.2783254057  | 2.0389919603  |
| H | -0.2263472392 | 0.1875267305  | 3.6200083155  |
| H | -1.5380539831 | 1.3376564699  | 3.9041946133  |
| N | -0.8158019988 | -0.0174054993 | 0.8985503695  |
| H | -2.1261360227 | -0.657814374  | 2.3939131699  |
| H | -2.5028870638 | 0.9314457201  | 1.7051305526  |
| C | 2.3270447602  | 0.5352484636  | -0.8503465295 |
| H | 3.0407131169  | 0.5757360336  | -0.0211386267 |
| H | 2.6730751933  | -0.2479823926 | -1.5319396848 |
| C | 2.3310303285  | 1.8776471649  | -1.5295742168 |
| C | 1.4790812538  | 2.550242404   | -2.3559395564 |
| C | 2.1255420734  | 3.7887386277  | -2.6883877367 |
| C | 3.3256276969  | 3.7766556392  | -2.0481434779 |
| O | 3.4668735951  | 2.6193202762  | -1.3340008284 |
| H | 4.1503425247  | 4.4714279723  | -1.9913384761 |
| H | 1.7429477184  | 4.5785581355  | -3.3202250248 |
| H | 0.5104729929  | 2.1992749162  | -2.678476287  |
| C | -0.9680483904 | -1.0135115175 | -0.0195468726 |
| C | -1.9911654608 | -1.9194253508 | -0.0186284839 |
| C | 0.1901248842  | -0.8371991506 | -1.0359341574 |
| C | -2.0604392083 | -3.1114620338 | -0.8368123691 |
| O | -3.2295930168 | -3.7553554645 | -0.6664245318 |
| O | -1.1862025505 | -3.5652500188 | -1.5919149705 |
| C | -3.3899969309 | -4.9939135026 | -1.3856193568 |
| O | -0.2839222167 | -0.1375295574 | -2.1901055884 |
| O | 0.8777305711  | -1.9846994518 | -1.3521779859 |
| C | -1.0068770075 | -0.8615976103 | -3.1862160784 |
| H | -4.3775687881 | -5.3633118196 | -1.1095959391 |
| H | -3.3382063582 | -4.8250063034 | -2.4638848529 |
| H | -2.6218926763 | -5.7139288939 | -1.0930354953 |
| H | -1.113284038  | -0.1755091415 | -4.0296276194 |
| H | -0.4651241553 | -1.7518932182 | -3.5174554883 |
| H | -2.0066792226 | -1.1477065302 | -2.8394579616 |
| H | -2.7929011988 | -1.8016733522 | 0.7002852075  |
| H | 0.2011176577  | -2.698089952  | -1.5063795232 |

#### 16b\_t1

|   |               |              |              |
|---|---------------|--------------|--------------|
| C | -1.2435395881 | 1.0101853507 | 0.5047423524 |
| N | -0.6696315022 | 1.9795454766 | 1.1318394542 |
| N | -0.4108799049 | 0.0281965196 | -0.070163033 |
| C | -1.5113593433 | 3.0184662637 | 1.7170274975 |
| C | -2.8529471095 | 2.4661263022 | 2.1916686137 |
| H | -0.9648098675 | 3.471305462  | 2.5522110927 |
| H | -1.6799584392 | 3.8241529286 | 0.9856154513 |
| C | -3.5333295643 | 1.7494866496 | 1.0337477053 |

|   |               |               |               |
|---|---------------|---------------|---------------|
| H | -2.6888051348 | 1.7671275711  | 3.0202412635  |
| H | -3.5091835339 | 3.2633646668  | 2.5552053647  |
| N | -2.6122360375 | 0.7885819899  | 0.3944282846  |
| H | -4.4023490615 | 1.1906666407  | 1.390330846   |
| H | -3.8788574097 | 2.4790000691  | 0.2906016446  |
| C | 1.0256696106  | 0.3394499873  | -0.1838345767 |
| H | 1.4220494535  | -0.1728971377 | -1.0611563677 |
| H | 1.0970625038  | 1.4146382455  | -0.3663718627 |
| C | 1.8729429281  | -0.0342142128 | 0.9977554149  |
| C | 1.7650948686  | 0.084911321   | 2.3532963929  |
| C | 2.9780991447  | -0.4458833738 | 2.9091022019  |
| C | 3.7411748765  | -0.8366957848 | 1.8529214862  |
| O | 3.0826930664  | -0.5933113536 | 0.6811011586  |
| H | 4.7217579071  | -1.279777318  | 1.7621257917  |
| H | 3.2418886254  | -0.5202966302 | 3.9552346067  |
| H | 0.9273157177  | 0.5062433142  | 2.8876256577  |
| C | -0.9673268138 | -1.0789596048 | -0.7071638544 |
| C | -0.1065925622 | -2.2923558109 | -0.905137349  |
| C | -3.1559517672 | 0.0413855945  | -0.7360184277 |
| C | -2.2749038321 | -1.1353076884 | -1.0138434041 |
| O | -4.4370181893 | -0.4531834147 | -0.4473422973 |
| H | -2.7157373571 | -2.0243450674 | -1.4402862567 |
| O | -0.5251432045 | -3.0244903322 | -1.9488123445 |
| O | 0.8316065824  | -2.5954894357 | -0.1940088667 |
| C | 0.1717985629  | -4.272825288  | -2.155868967  |
| H | -0.2964315485 | -4.7244810952 | -3.0297637434 |
| H | 1.2321656702  | -4.0902408955 | -2.3437801826 |
| H | 0.060487448   | -4.9234444175 | -1.2853143414 |
| O | -3.2272049327 | 0.9710266524  | -1.8176121975 |
| C | -3.6447594155 | 0.4354034437  | -3.0777771642 |
| H | -3.7540809677 | 1.2897057876  | -3.7493470273 |
| H | -2.8970223624 | -0.2502483634 | -3.4935741737 |
| H | -4.6059304456 | -0.0848558393 | -3.0017614259 |
| H | -5.0618220712 | 0.285903827   | -0.5360884176 |

#### 16b\_t2

|   |               |               |               |
|---|---------------|---------------|---------------|
| C | -1.1971393144 | 0.9200951055  | 0.4952855566  |
| N | -0.6383057615 | 1.89844668    | 1.1182753203  |
| N | -0.3483683509 | -0.0083016431 | -0.1443302076 |
| C | -1.4950455705 | 2.8704522557  | 1.7898151944  |
| C | -2.7837817205 | 2.2369663473  | 2.3079385032  |
| H | -0.9265549838 | 3.3151033894  | 2.6149631475  |
| H | -1.7373454304 | 3.6958937615  | 1.102571571   |
| C | -3.4888625366 | 1.5330080142  | 1.1571193111  |
| H | -2.545395959  | 1.5157905226  | 3.0986144906  |
| H | -3.4560973488 | 2.9876492467  | 2.7355978     |
| N | -2.5599836572 | 0.6358892699  | 0.4405664502  |
| H | -4.3160711471 | 0.9244417917  | 1.531808978   |
| H | -3.8995931992 | 2.2731892001  | 0.4591419723  |
| C | 1.0768343333  | 0.345848585   | -0.2387842115 |

|   |               |               |               |
|---|---------------|---------------|---------------|
| H | 1.5109870204  | -0.2429850352 | -1.0482683432 |
| H | 1.1520110328  | 1.3988810257  | -0.5187960916 |
| C | 1.8539079716  | 0.1518996835  | 1.0300531954  |
| C | 1.8896939986  | -0.8001437595 | 2.0062538766  |
| C | 2.9037087716  | -0.3928951029 | 2.9377180166  |
| C | 3.4191670736  | 0.7699882486  | 2.4551111863  |
| O | 2.7887553687  | 1.1178528866  | 1.2931673473  |
| H | 4.1941273716  | 1.4419321125  | 2.792594984   |
| H | 3.2064822617  | -0.9033202583 | 3.8417993268  |
| H | 1.2762742585  | -1.687333081  | 2.0460182074  |
| C | -0.8866018401 | -1.0889162053 | -0.8389322899 |
| C | 0.0029662467  | -2.2572487809 | -1.1521434425 |
| C | -3.1208794604 | -0.064686051  | -0.7102147033 |
| C | -2.2023227178 | -1.1777942137 | -1.1021739101 |
| O | -4.3647622999 | -0.635512449  | -0.3982737977 |
| H | -2.6225788601 | -2.0529020537 | -1.5753983492 |
| O | -0.4202613906 | -2.9169490997 | -2.2394672866 |
| O | 0.9667217278  | -2.5900308483 | -0.4881446326 |
| C | 0.302703095   | -4.126826493  | -2.5592092201 |
| H | -0.1744696033 | -4.5202428614 | -3.4559688346 |
| H | 1.3534664279  | -3.9016690582 | -2.7543190531 |
| H | 0.2269728831  | -4.8461943967 | -1.7405096375 |
| O | -3.2843554332 | 0.9251706488  | -1.7276062281 |
| C | -3.7346755839 | 0.4477536213  | -2.9996220081 |
| H | -3.9180867862 | 1.3350747084  | -3.6094249793 |
| H | -2.9746880303 | -0.1708110255 | -3.4916011393 |
| H | -4.6642913546 | -0.1257324974 | -2.9143830916 |
| H | -5.0251295024 | 0.0772088084  | -0.4192649781 |

#### 17b\_t1

|   |               |               |               |
|---|---------------|---------------|---------------|
| C | -0.9021126239 | 1.5224096252  | 0.2436815279  |
| N | -0.5829690675 | 2.6237958181  | 0.7911948885  |
| N | -0.0016620582 | 0.5283096133  | -0.1713734586 |
| C | -1.689760824  | 3.5251349599  | 1.1445078482  |
| C | -3.0265197464 | 2.8115504232  | 1.3897062673  |
| H | -1.3944388371 | 4.0809726251  | 2.0398026831  |
| H | -1.7972564556 | 4.2650431285  | 0.3391803144  |
| C | -3.3707869001 | 1.8747201003  | 0.2309708092  |
| H | -2.9649215596 | 2.2312933632  | 2.3171844636  |
| H | -3.8271852201 | 3.5466456809  | 1.5099782812  |
| N | -2.187411914  | 1.0595155369  | -0.0549269364 |
| H | -4.1933048836 | 1.1996457174  | 0.4753101223  |
| H | -3.640110885  | 2.4374496321  | -0.6695461703 |
| H | -1.1461785388 | -2.3702015751 | -1.5546129322 |
| C | 1.4251824584  | 0.6164908802  | 0.1883578939  |
| H | 2.012311774   | 0.2715806012  | -0.6596553692 |
| H | 1.6184674533  | 1.6763986352  | 0.3645953463  |
| C | 1.7934197074  | -0.1926801691 | 1.3873324817  |
| C | 2.5444912724  | -1.3202733229 | 1.5526782757  |
| C | 2.5586950442  | -1.6018934268 | 2.959353175   |

C 1.8111985807 -0.6280233669 3.5465252511  
O 1.339213829 0.242160522 2.606761023  
H 1.5322680501 -0.4171533744 4.5682503304  
H 3.0571393921 -2.419728957 3.4608090779  
H 3.0260829035 -1.8780030682 0.7628277047  
C -0.6850168159 -0.5351568776 -0.7230929918  
C -0.3226873534 -1.7154386351 -1.2881330706  
C -2.149840894 -0.1760892575 -0.6254102193  
C 1.0060878407 -2.2193545985 -1.6386721946  
O -3.2394928328 -3.3489554771 -2.2714709262  
O -3.1236588142 -0.8275236605 -0.9926202193  
C -3.3612169028 -2.9963868932 -3.6424917575  
O 0.9319702812 -3.5406163941 -1.9187375416  
O 2.0512991573 -1.5869684833 -1.7340699602  
C 2.1550570368 -4.1627966852 -2.3537917644  
H -3.2866990332 -3.9157840735 -4.2321336786  
H -4.3296368103 -2.5261759684 -3.8710213973  
H -2.5647882762 -2.3152028914 -3.9770143359  
H 1.8957079769 -5.1999848898 -2.5667296108  
H 2.5386389722 -3.6766030286 -3.2544049479  
H 2.9141465705 -4.1191223842 -1.5685288222  
H -3.2709200538 -2.517082404 -1.7648154602

#### **E-17b\_t1**

C -0.9893296058 1.5113328647 0.2982494621  
N -0.7269325843 2.6000842177 0.9032401351  
N -0.058497692 0.5307041721 -0.0541280482  
C -1.8706031977 3.487914716 1.161131652  
C -3.2182905786 2.7589625836 1.2595287887  
H -1.6710729891 4.0288730185 2.0915046488  
H -1.9070916078 4.2430141488 0.3632775324  
C -3.4412863503 1.8481406856 0.0507695301  
H -3.2396625118 2.156397151 2.1746428573  
H -4.0340343829 3.4848073882 1.3208691589  
N -2.2274901459 1.053951206 -0.1449385274  
H -4.2752930791 1.1593932766 0.2008579609  
H -3.6367156246 2.4324129894 -0.8554807516  
C 1.372325203 0.6827197276 0.2222938333  
H 1.9363103002 0.5049749969 -0.6974688071  
H 1.5057513061 1.7296851837 0.5061724273  
C 1.8951174204 -0.2243571663 1.2881175652  
C 2.8763838872 -1.1722330197 1.3014036675  
C 2.9545365953 -1.6610323889 2.6485453208  
C 2.012811554 -0.9772711385 3.3532337284  
O 1.359905616 -0.0930184852 2.5421052728  
H 1.6924152021 -0.9975870188 4.3844019518  
H 3.6195195092 -2.4215020117 3.0333604151  
H 3.4723937216 -1.4826231409 0.4543113933  
C -0.6638180784 -0.5203124168 -0.7200868534  
C 0.0099173949 -1.5992998522 -1.1980632295



C -2.1373201064 -0.1595396758 -0.7832106262  
C -0.5160640781 -2.7638069559 -1.9131105265  
O -4.5392661553 -2.910363475 -2.6413217695  
O -3.0782358035 -0.7563393098 -1.2782225062  
C -4.4081398043 -2.6231231104 -4.019454958  
O 0.5266174415 -3.5612589996 -2.2658838169  
O -1.6711583167 -3.0543040154 -2.1818133339  
C 0.1807926915 -4.7645522424 -2.9725544277  
H -5.3132471327 -2.9767875054 -4.5262628956  
H -4.3114632055 -1.5446845727 -4.2247449914  
H -3.5455978419 -3.1288673384 -4.4805741676  
H 1.1256055021 -5.2731559444 -3.1658834689  
H -0.4709556827 -5.3988461514 -2.3658994329  
H -0.3210390108 -4.5320451595 -3.9156225756  
H -3.7275052355 -2.5864166691 -2.2156278624  
H 1.080471457 -1.6307775627 -1.0383637252

#### 17b\_t2

C -0.5867575517 1.67633881 0.4579142643  
N -0.21089744 2.724070143 1.0722079782  
N 0.267975712 0.6224629175 0.1018363858  
C -1.2608948494 3.7044251662 1.3745112696  
C -2.6346690771 3.0559545562 1.5649330127  
H -0.9657938304 4.2452810581 2.2789081815  
H -1.2968418079 4.4444501683 0.5625992816  
C -3.0110116587 2.1908984981 0.3614937686  
H -2.61827361 2.4385695412 2.4704107971  
H -3.4040741581 3.8215815385 1.7008151708  
N -1.8675402099 1.3281557822 0.0140877982  
H -3.8633489403 1.5519134576 0.5863793671  
H -3.2701409384 2.8054022119 -0.5043521261  
C 1.7104546193 0.5877187936 0.3752996033  
H 2.1999563442 0.1689038369 -0.5056692126  
H 2.0283310623 1.624888629 0.497377934  
C 2.0805650936 -0.228135181 1.5680104359  
C 2.6148575296 -1.4754395921 1.7102956285  
C 2.7439041182 -1.7070516936 3.1199203189  
C 2.2759799981 -0.5844472878 3.7310150366  
O 1.8695539203 0.3296044395 2.802448578  
H 2.1720003028 -0.2871163439 4.7639995335  
H 3.1330744311 -2.5897926066 3.6077387382  
H 2.8817879467 -2.1468319598 0.9061880022  
C -0.4205407691 -0.3677195879 -0.5376822975  
O 0.0631646337 -1.4137081187 -0.9618667099  
C -1.8477555108 0.1123566253 -0.6315268859  
O -1.1697788187 -3.500808888 -2.4210050718  
C -2.7774123774 -0.6362849922 -1.276907342  
C -0.8277842401 -3.1797776128 -3.7622837837  
H -1.3718432465 -3.8655818704 -4.4196673901  
H -1.1104744109 -2.152852713 -4.0374261544

H 0.2474962353 -3.3019784674 -3.9623002157  
H -0.7082253188 -2.8569121494 -1.8533670916  
C -4.1541460837 -0.2855759369 -1.6369375949  
H -2.4401136347 -1.6114008548 -1.6133192855  
O -4.8162279967 -1.3959666032 -2.0405526329  
O -4.666411627 0.8243585518 -1.639388272  
C -6.1710361308 -1.1915168334 -2.4808498119  
H -6.5393960403 -2.1777328142 -2.763789959  
H -6.7829380471 -0.7776988113 -1.6751650176  
H -6.2022606224 -0.5165658067 -3.3402422298

#### E-17b\_t2

C -0.8846711022 1.4990852511 0.3349967402  
N -0.6403559542 2.5826322419 0.9568515647  
N 0.0777528055 0.5728981176 -0.0744679577  
C -1.80298959 3.4282638425 1.2585635214  
C -3.1133433625 2.6448969164 1.3950859499  
H -1.5937122491 3.9716036249 2.185375076  
H -1.893998417 4.1851094703 0.4665870051  
C -3.3484255952 1.7366221147 0.1858409633  
H -3.0754763857 2.0314529231 2.3023500513  
H -3.9582967348 3.3320008411 1.4953840334  
N -2.1139905736 0.9970319697 -0.0890226089  
H -4.1462001127 1.0184421152 0.3908288896  
H -3.6279238495 2.3152231826 -0.7026785977  
C 1.5201433721 0.7100781735 0.152794142  
H 2.0279853091 0.4457770345 -0.7766545182  
H 1.7021535379 1.7651722102 0.3671886808  
C 2.0445573584 -0.1544893468 1.2501576431  
C 2.7387340106 -1.328903745 1.2569569228  
C 2.958893928 -1.6666886275 2.6335596043  
C 2.3792165103 -0.6744946181 3.3629577613  
O 1.818889752 0.25790882 2.5383536789  
H 2.284962178 -0.4869089457 4.4221794733  
H 3.478165929 -2.5311347688 3.0230748518  
H 3.0498167404 -1.8869944433 0.3850661001  
C -0.4860673126 -0.4681561355 -0.781495797  
O 0.140001102 -1.3849625056 -1.2846691166  
C -1.9740194473 -0.1766400933 -0.7976525323  
O 0.4833609638 -4.2323223037 -1.951034289  
C -3.0080091384 -0.8300419279 -1.3903749264  
C 1.0545398436 -4.0144826289 -3.2261221281  
H 1.7856848072 -4.8100383962 -3.4097039901  
H 0.3118051821 -4.0501539912 -4.0392147879  
H 1.5823532176 -3.0507644718 -3.2982059195  
H -0.1558386885 -3.5128794291 -1.8124440394  
C -2.9835816546 -2.0926384348 -2.1292931524  
H -3.9886981046 -0.3733051289 -1.3238478082  
O -4.2079597347 -2.298772305 -2.6811070938  
O -2.0709604423 -2.8933444683 -2.2654328836

|   |               |               |               |
|---|---------------|---------------|---------------|
| C | -4.3583539071 | -3.5175088539 | -3.4292581258 |
| H | -5.3896824796 | -3.5192737615 | -3.7828964545 |
| H | -3.669828573  | -3.5407772373 | -4.2781542197 |
| H | -4.1760211385 | -4.3889992811 | -2.7948417066 |

#### 18b\_t1

|   |               |               |               |
|---|---------------|---------------|---------------|
| C | -0.9805291263 | 1.0993428396  | 0.3264164719  |
| N | -0.4071339336 | 2.0401139189  | 0.9758359514  |
| N | -0.1712614855 | 0.0612678326  | -0.19171752   |
| C | -1.2104657143 | 3.1144426665  | 1.549809238   |
| C | -2.6437048792 | 2.6817276643  | 1.8469033097  |
| H | -0.7127191187 | 3.4566098232  | 2.4638921448  |
| H | -1.2121966484 | 3.9702098945  | 0.8593244346  |
| C | -3.2486819377 | 2.0509074374  | 0.6023945806  |
| H | -2.650403851  | 1.9582486021  | 2.6702916029  |
| H | -3.2571765026 | 3.5355449016  | 2.149852672   |
| N | -2.3582619424 | 0.9929809916  | 0.0719775674  |
| H | -4.2112331279 | 1.5826515852  | 0.8063156335  |
| H | -3.4013514539 | 2.8014868411  | -0.1814972222 |
| C | 1.2894183063  | 0.2323025685  | -0.0316811129 |
| H | 1.7763918198  | -0.387097403  | -0.7837797798 |
| H | 1.5251405345  | 1.2747765854  | -0.2473584991 |
| C | 1.7902498052  | -0.0900977606 | 1.3427338096  |
| C | 1.628745611   | -1.1401654379 | 2.1993342927  |
| C | 2.4170327477  | -0.8436751516 | 3.3609384642  |
| C | 3.0086028844  | 0.3584992108  | 3.1217933898  |
| O | 2.6352231292  | 0.8335961556  | 1.8975582367  |
| H | 3.6873006514  | 0.9821451892  | 3.6844366086  |
| H | 2.5284688057  | -1.4491263991 | 4.2498889806  |
| H | 1.0300024058  | -2.0197922851 | 2.0164798922  |
| C | -0.720678283  | -0.9524338766 | -0.9369510162 |
| C | 0.1418742183  | -2.1227078558 | -1.3404489177 |
| C | -2.9397923139 | 0.0121731165  | -0.7204729227 |
| C | -2.0472263483 | -1.0028081557 | -1.2236000872 |
| O | -4.1602685254 | 0.0388319725  | -0.9529137582 |
| H | -2.4727368814 | -1.807239784  | -1.8062947361 |
| O | -0.160123678  | -2.5371953946 | -2.5713338456 |
| O | 0.959587026   | -2.647979266  | -0.6105785025 |
| C | 0.5237810787  | -3.7329892722 | -3.0213992285 |
| H | 0.1580904606  | -3.9091137561 | -4.0318240811 |
| H | 1.6033800985  | -3.5705178864 | -3.0268615306 |
| H | 0.2781287101  | -4.5759151424 | -2.3721175787 |
| H | -4.7096961773 | -1.3358934174 | -2.0200065573 |
| O | -4.83560768   | -2.0545879602 | -2.6731932779 |
| C | -4.8634563199 | -1.4417185642 | -3.9521794387 |
| H | -4.962474586  | -2.2322547188 | -4.7037322035 |
| H | -5.7156447192 | -0.7549584707 | -4.0741717312 |
| H | -3.9437240594 | -0.8797908389 | -4.1761057337 |

#### 18b\_t2

|   |               |               |               |
|---|---------------|---------------|---------------|
| C | -0.6204650259 | 1.0724900419  | 0.2266228497  |
| N | -0.3294763278 | 2.0841060348  | 0.9537793918  |
| N | 0.4213817109  | 0.1825744844  | -0.1205110043 |
| C | -1.3837587443 | 3.0034456402  | 1.3656418726  |
| C | -2.7401545924 | 2.3141753846  | 1.4542953939  |
| H | -1.1013863813 | 3.430709179   | 2.3338958928  |
| H | -1.4337207074 | 3.8428744911  | 0.6571081942  |
| C | -3.0373090227 | 1.6170475768  | 0.1358905399  |
| H | -2.7338934054 | 1.584077206   | 2.2716336991  |
| H | -3.538861641  | 3.0342821143  | 1.6557694091  |
| N | -1.8988023046 | 0.7429326777  | -0.2623151357 |
| H | -3.9251568069 | 0.9920675642  | 0.22404969    |
| H | -3.2103768921 | 2.3471284667  | -0.659065452  |
| C | 1.7744438153  | 0.5036705792  | 0.3534106398  |
| H | 2.4636245992  | 0.0175364881  | -0.3397232487 |
| H | 1.9120658992  | 1.5830169001  | 0.2975521324  |
| C | 2.0254664906  | 0.0465448542  | 1.7591202926  |
| C | 1.6440317496  | -1.0389760797 | 2.4917796644  |
| C | 2.2863684662  | -0.9123515399 | 3.7703056337  |
| C | 3.0165723781  | 0.2337300078  | 3.7176865756  |
| O | 2.8671556267  | 0.8330654199  | 2.4970976636  |
| H | 3.6599072658  | 0.7438486364  | 4.4188921379  |
| H | 2.2101829057  | -1.5877109728 | 4.611236729   |
| H | 0.9868404594  | -1.8327843956 | 2.1658956638  |
| C | 0.255365853   | -0.9726166152 | -0.873722098  |
| O | 1.2189788765  | -1.7235487281 | -1.1019386804 |
| C | -2.0864724865 | -0.3593831532 | -1.0599179965 |
| C | -1.0797353266 | -1.2172843828 | -1.3628157582 |
| C | -3.422554665  | -0.5476761998 | -1.7358110766 |
| O | -3.7749247147 | -1.8344139606 | -1.7535262948 |
| O | -4.0549735583 | 0.3561225039  | -2.2442527683 |
| C | -4.9903208539 | -2.1456408189 | -2.4781632558 |
| H | -5.1163063209 | -3.2226662565 | -2.3784454892 |
| H | -5.838176128  | -1.6180402389 | -2.0365174285 |
| H | -4.8863934784 | -1.8672915743 | -3.5290294764 |
| H | -1.2370685492 | -2.083765933  | -1.9891512158 |
| H | 0.7857252944  | -3.1306045628 | -2.1871909666 |
| O | 0.4335050859  | -3.7562990694 | -2.8527139702 |
| C | 0.8860191396  | -3.301571277  | -4.1181470095 |
| H | 0.4672741056  | -3.9628724859 | -4.8841661429 |
| H | 0.5580591999  | -2.2755407387 | -4.3448849547 |
| H | 1.9827680115  | -3.3330572686 | -4.211518643  |

#### S7.4. B3LYP Optimized geometries (from 1c tautomers)

##### **1c\_t1**

|   |              |              |              |
|---|--------------|--------------|--------------|
| C | 1.3094437249 | 0.2518891738 | 0.9728995236 |
| N | 2.5836556956 | 0.6275707707 | 0.5844909687 |

|   |               |               |               |
|---|---------------|---------------|---------------|
| N | 1.0798136485  | -0.9840465936 | 1.3058930774  |
| N | 0.3618558878  | 1.2589974127  | 0.9778224592  |
| C | 0.6112821587  | 2.7072531712  | 0.8906344968  |
| H | -0.4861618179 | 1.0292788301  | 1.4784364074  |
| H | 2.6434228565  | 1.4645877777  | 0.0193539722  |
| C | 3.6340839968  | -0.3568872495 | 0.3005641838  |
| C | -0.2536923306 | -1.3178161041 | 1.7926913481  |
| C | 1.2764850024  | 3.274394612   | 2.1523160012  |
| C | -0.7236152065 | 3.3966217365  | 0.5979960559  |
| H | 1.2685385667  | 2.8884410115  | 0.0318989428  |
| H | 3.5514611827  | -1.1227028842 | 1.0765033816  |
| C | 3.4614525428  | -1.0297551215 | -1.068368491  |
| C | 4.99318228    | 0.3366990707  | 0.4213648483  |
| H | -1.0362831674 | -1.0645061792 | 1.0547928117  |
| H | -0.5216399157 | -0.7744025208 | 2.7146924898  |
| C | -0.3681083785 | -2.7738307372 | 2.1110724455  |
| H | 4.2516954958  | -1.7697167943 | -1.2383801298 |
| H | 2.497948913   | -1.5432467844 | -1.13008884   |
| H | 3.5127581755  | -0.2886753864 | -1.8752750468 |
| H | 5.8052941682  | -0.377023174  | 0.2501907754  |
| H | 5.0917265295  | 1.1384857805  | -0.3212836765 |
| H | 5.1235820453  | 0.7763686545  | 1.4154280238  |
| H | -0.5793659555 | 4.4753091824  | 0.486675254   |
| H | -1.1725658641 | 3.0098122447  | -0.3221395511 |
| H | -1.4315438484 | 3.2351066731  | 1.4202495338  |
| H | 1.4595141204  | 4.3487676007  | 2.0404904512  |
| H | 0.6302196497  | 3.1265132399  | 3.0252869306  |
| H | 2.2351999458  | 2.7849650592  | 2.3458326892  |
| C | -0.5269326825 | -3.4705638632 | 3.2736713173  |
| C | -0.5752241241 | -4.8624810765 | 2.9205658515  |
| C | -0.442097554  | -4.9112066536 | 1.567653521   |
| O | -0.3165888221 | -3.6495615075 | 1.0570561351  |
| H | -0.4177896338 | -5.7173633468 | 0.8493231229  |
| H | -0.6926101387 | -5.7068842883 | 3.5857434258  |
| H | -0.5993731467 | -3.0425667369 | 4.2641732896  |

# 1c\_t2

|   |               |               |               |
|---|---------------|---------------|---------------|
| C | -0.8467828495 | 0.042184089   | -0.4712704657 |
| N | -1.4490860278 | 0.1820459512  | 0.6660835912  |
| C | -1.0662536524 | 1.2517535864  | 1.5858097982  |
| N | 0.0823623398  | 0.9122601244  | -1.0207394099 |
| C | 1.1244360211  | 0.5493765099  | -1.9994735405 |
| N | -1.1352085951 | -1.0675914232 | -1.2603861438 |
| C | -2.2375025248 | -1.9493798334 | -0.8768139957 |
| C | -2.2603531062 | -3.1816345979 | -1.7156311061 |
| H | -2.1060525942 | -2.2045606506 | 0.1784904978  |
| H | -3.2176168028 | -1.4599800186 | -0.9631608909 |
| O | -1.2209364084 | -4.0655662177 | -1.5700723192 |
| C | -1.4574590662 | -5.1113237144 | -2.4159840521 |
| C | -2.6204600992 | -4.9190116295 | -3.0953891967 |

|   |               |               |               |
|---|---------------|---------------|---------------|
| C | -3.1422596584 | -3.6613541823 | -2.6400537996 |
| H | -4.0548117254 | -3.1757306544 | -2.9574562495 |
| H | -3.0545468743 | -5.5848449146 | -3.8282825818 |
| H | -0.7161992496 | -5.8967492329 | -2.416140124  |
| C | -1.328482809  | 0.7731238493  | 3.0190090131  |
| H | 0.0112610259  | 1.4880526629  | 1.5169637285  |
| C | -1.8493115015 | 2.5424686025  | 1.2907008936  |
| H | 0.3833882358  | 1.6345398898  | -0.378724054  |
| C | 1.737001054   | 1.8463874007  | -2.5331979043 |
| C | 2.1930076706  | -0.3836719172 | -1.4146647261 |
| H | 0.6391199046  | 0.0409072923  | -2.839336932  |
| H | 2.9423588864  | -0.6336798516 | -2.1739485185 |
| H | 2.706241596   | 0.0973529125  | -0.5737960002 |
| H | 1.7472381022  | -1.3174938289 | -1.0598659209 |
| H | -1.0468669289 | 1.5382416129  | 3.7511017194  |
| H | -2.391272275  | 0.5408543883  | 3.1560234859  |
| H | -0.7560531009 | -0.1352891699 | 3.2356674206  |
| H | -1.5983495817 | 3.3305731154  | 2.0099258646  |
| H | -1.6313101552 | 2.920467261   | 0.2861970718  |
| H | -2.9273589757 | 2.3529017762  | 1.3528702453  |
| H | -1.080127825  | -0.9060850076 | -2.2589588209 |
| H | 2.4910022926  | 1.6275605333  | -3.2951851006 |
| H | 0.9705800156  | 2.4888076059  | -2.9780749447 |
| H | 2.2269722429  | 2.4054116808  | -1.7264055323 |

# NCov(1a\_t1)

|   |               |               |               |
|---|---------------|---------------|---------------|
| C | -0.8965676164 | 2.4295161805  | -0.3954149235 |
| N | -1.8338104795 | 1.6033609524  | 0.1970250936  |
| N | 0.3238440802  | 2.0089014927  | -0.5644911021 |
| N | -1.3554659401 | 3.6768667839  | -0.7753070835 |
| C | -2.7607433857 | 4.1000727217  | -0.8904076626 |
| H | -0.7335471989 | 4.1788023238  | -1.3945490909 |
| H | -2.6344826185 | 2.0704450495  | 0.6027309478  |
| C | -1.4664447031 | 0.3548813632  | 0.8740969946  |
| C | 1.2450560682  | 2.8879771247  | -1.2776189359 |
| C | -3.4870525592 | 3.4345701462  | -2.0673641321 |
| C | -2.7854743346 | 5.6263012671  | -1.0006013529 |
| H | -3.2736046566 | 3.8294390544  | 0.040182734   |
| H | -0.7118839275 | -0.1251713162 | 0.2466516259  |
| C | -0.8664574242 | 0.5918438751  | 2.2670925915  |
| C | -2.7023580959 | -0.5458105376 | 0.9392147186  |
| H | 1.3600148379  | 3.8611989551  | -0.7675833433 |
| H | 0.9058657534  | 3.1219788055  | -2.3007677115 |
| C | 2.5992522692  | 2.2706750472  | -1.4122609104 |
| H | -0.5713450508 | -0.3572916679 | 2.7272146122  |
| H | 0.0195840971  | 1.230054831   | 2.2080392769  |
| H | -1.5971894223 | 1.0757745713  | 2.9266195184  |
| H | -2.4510956369 | -1.5061984122 | 1.4005920811  |
| H | -3.4955799086 | -0.0833674087 | 1.5399913239  |
| H | -3.1019282039 | -0.738316869  | -0.0616890166 |

|   |               |               |               |
|---|---------------|---------------|---------------|
| H | -3.8167049626 | 5.9881077796  | -1.0503230831 |
| H | -2.2960442788 | 6.0906862048  | -0.1388568141 |
| H | -2.2687436856 | 5.958110413   | -1.9095590471 |
| H | -4.5322814374 | 3.7602381647  | -2.1079239146 |
| H | -3.0075050491 | 3.7043316499  | -3.0154393404 |
| H | -3.4742784858 | 2.3451045609  | -1.9719787427 |
| C | 3.3115698074  | 1.7911267621  | -2.4727202316 |
| C | 4.5640217068  | 1.3174624654  | -1.952622516  |
| C | 4.5234844352  | 1.5423793922  | -0.6113726988 |
| O | 3.336226643   | 2.1252761546  | -0.2637480637 |
| H | 5.2188403989  | 1.3654783182  | 0.1957842683  |
| H | 5.3801567278  | 0.8723165029  | -2.504895695  |
| H | 2.9818916749  | 1.7755974172  | -3.5025415632 |
| C | 0.5799850265  | -4.0458816395 | 1.5922217549  |
| C | -0.3212549111 | -4.8426583331 | 1.7332135154  |
| C | 1.7112333994  | -3.1427436977 | 1.4754010194  |
| C | -1.3905317642 | -5.8213322604 | 1.8122652068  |
| O | 1.3424107439  | -1.9832344028 | 0.9274093426  |
| O | 2.8318178666  | -3.4368151464 | 1.8417283668  |
| C | 2.3893495661  | -0.9893098441 | 0.7718310218  |
| H | 1.8929582853  | -0.1192283    | 0.3476214294  |
| H | 2.8271507894  | -0.7512089652 | 1.7433785776  |
| H | 3.1623330945  | -1.3640219307 | 0.0978653472  |
| O | -2.0563406443 | -5.71254515   | 2.9644455187  |
| O | -1.6224768179 | -6.6192970212 | 0.9258082504  |
| C | -3.1517745316 | -6.6445676996 | 3.1470662899  |
| H | -3.5679613647 | -6.4078304355 | 4.1250598818  |
| H | -3.9021158015 | -6.5034556463 | 2.3664352512  |
| H | -2.7815713741 | -7.671652647  | 3.1261834148  |

# NCov(1a\_t2)

|   |               |               |               |
|---|---------------|---------------|---------------|
| C | -1.8882660798 | 0.604871229   | -0.0864246531 |
| N | -1.1938686497 | 1.5484846114  | -0.6415719291 |
| C | -1.3902003863 | 2.9402031722  | -0.2332572537 |
| N | -2.7404136884 | 0.747959059   | 0.9963993097  |
| C | -3.8593053619 | -0.149106776  | 1.3384361341  |
| N | -1.8017584155 | -0.6912652781 | -0.582520188  |
| C | -0.8044371003 | -1.0079207109 | -1.6041143053 |
| C | -0.9764912407 | -2.3993134079 | -2.1109102208 |
| H | -0.9215660934 | -0.2882893102 | -2.419443587  |
| H | 0.2242695797  | -0.9039948876 | -1.2345172498 |
| O | -2.1084081288 | -2.673283986  | -2.8366066241 |
| C | -2.0456513573 | -3.9872356931 | -3.2035295197 |
| C | -0.9036610591 | -4.5578405573 | -2.7328618593 |
| C | -0.208362217  | -3.5236856483 | -2.0200007201 |
| H | 0.7400698133  | -3.6036853918 | -1.5067466675 |
| H | -0.5926420475 | -5.5837857538 | -2.8726833743 |
| H | -2.8769119008 | -4.3562670441 | -3.7859967708 |
| C | -1.0315965175 | 3.8506230749  | -1.4138936394 |
| H | -2.4474695684 | 3.1418966283  | 0.0184127623  |

|   |               |               |               |
|---|---------------|---------------|---------------|
| C | -0.5377330038 | 3.2927700497  | 0.9987282335  |
| H | -2.9145661352 | 1.7114294556  | 1.2514549082  |
| C | -4.3501896322 | 0.2283608223  | 2.7378828841  |
| C | -4.9957692478 | -0.1066772752 | 0.3082563617  |
| H | -3.4708324571 | -1.1722239542 | 1.3888105529  |
| H | -5.8011683939 | -0.7913075038 | 0.5965706116  |
| H | -5.4149350561 | 0.9038692285  | 0.2385957574  |
| H | -4.6385350448 | -0.4028040506 | -0.6822205554 |
| H | -1.2090724379 | 4.9038019675  | -1.1683843843 |
| H | 0.0256858437  | 3.7352947936  | -1.6788783885 |
| H | -1.6318917332 | 3.5989328568  | -2.2948670696 |
| H | -0.6677796658 | 4.3446446187  | 1.2785619099  |
| H | -0.8088762619 | 2.6786706723  | 1.8639229788  |
| H | 0.5232562312  | 3.1250146175  | 0.783167789   |
| H | -1.9135409969 | -1.4221520774 | 0.1096426349  |
| H | -5.1562382532 | -0.4408944271 | 3.0530529453  |
| H | -3.5389702017 | 0.1628187479  | 3.4697530301  |
| H | -4.7406734478 | 1.2534482369  | 2.7493214058  |
| C | 3.1915474714  | 0.7551580997  | 0.5036645353  |
| C | 3.5245668107  | 0.3167197046  | 1.5823563474  |
| C | 2.7909662666  | 1.367970774   | -0.7493299414 |
| C | 4.013037368   | -0.220989865  | 2.8393734469  |
| O | 2.5689984325  | 0.4458085674  | -1.6882288502 |
| O | 2.6905473963  | 2.5712129794  | -0.891881962  |
| C | 2.1342925921  | 0.9513004486  | -2.9771035474 |
| H | 2.0307696654  | 0.0698772929  | -3.6079151635 |
| H | 1.177121268   | 1.4644852446  | -2.8704588898 |
| H | 2.8831188979  | 1.6316442894  | -3.3873883419 |
| O | 3.0133200622  | -0.4041817032 | 3.7047607188  |
| O | 5.1867764583  | -0.4609005352 | 3.0421247469  |
| C | 3.3918526629  | -0.9446000306 | 4.995891887   |
| H | 2.4620574303  | -1.0186680511 | 5.5577026089  |
| H | 3.8462662459  | -1.9301543758 | 4.8743782274  |
| H | 4.0906322855  | -0.2717289487 | 5.4972399284  |

# TS1(1c\_t1)

|   |               |              |               |
|---|---------------|--------------|---------------|
| C | -0.9423933577 | 1.0133482227 | 0.1039607118  |
| N | -1.4171359916 | 0.8871559119 | 1.3723792418  |
| N | 0.2944230661  | 0.6315925074 | -0.1819437011 |
| N | -1.7938210734 | 1.5209909522 | -0.8345413812 |
| C | -3.0999746773 | 2.1637782888 | -0.6271398422 |
| H | -1.5536573116 | 1.3381359609 | -1.7992916234 |
| H | -2.4069526995 | 1.023798028  | 1.52073458    |
| C | -0.6100892968 | 0.7238567424 | 2.5874561476  |
| C | 0.817540426   | 0.9614712953 | -1.5085710933 |
| C | -4.2500722126 | 1.1502464817 | -0.7167812238 |
| C | -3.2597014775 | 3.2923523971 | -1.6491901575 |
| H | -3.0859689983 | 2.6069424292 | 0.3738683779  |
| H | 0.4167317577  | 0.5732262849 | 2.2543036686  |
| C | -0.6860297672 | 1.9917679262 | 3.4481494263  |



|   |               |               |               |
|---|---------------|---------------|---------------|
| C | -1.0756979011 | -0.5129321335 | 3.3630306731  |
| H | 0.4965560069  | 1.9711838501  | -1.8058510146 |
| H | 0.4477753151  | 0.2729229629  | -2.2838205104 |
| C | 2.3097046341  | 0.9128270708  | -1.5553224129 |
| H | -0.0799555284 | 1.8777385402  | 4.3534762335  |
| H | -0.3177236477 | 2.8637959815  | 2.8981617073  |
| H | -1.7187014236 | 2.1932181904  | 3.757792098   |
| H | -0.4579640228 | -0.660598867  | 4.2550880416  |
| H | -2.1161632692 | -0.3990720829 | 3.6914560277  |
| H | -1.0102310048 | -1.4122527856 | 2.7441573637  |
| H | -4.2182138629 | 3.8004728636  | -1.506677729  |
| H | -2.4576889526 | 4.0299300091  | -1.5485276229 |
| H | -3.2378801249 | 2.8957117913  | -2.6713085222 |
| H | -5.2098798957 | 1.6422566597  | -0.5270537216 |
| H | -4.2868657592 | 0.7027602864  | -1.7165351492 |
| H | -4.129859829  | 0.3436488032  | 0.0138621056  |
| C | 3.1987298896  | 0.1292574997  | -2.232576738  |
| C | 4.5110795767  | 0.6006996015  | -1.8877267076 |
| C | 4.3225711884  | 1.637121014   | -1.0258621884 |
| O | 2.9892424003  | 1.8458973909  | -0.8169186109 |
| H | 4.9941438109  | 2.3023658261  | -0.5034368205 |
| H | 5.4605575376  | 0.2177628771  | -2.2354810907 |
| H | 2.9479913074  | -0.6877786796 | -2.894933783  |
| C | 0.6094318007  | -1.4281441054 | 0.0810220842  |
| C | -0.3005131773 | -2.18741434   | -0.3204712812 |
| C | 1.9676838961  | -1.5399187077 | 0.6423901527  |
| C | -1.5437362128 | -2.5128007364 | -0.9305397923 |
| O | 2.3497935854  | -0.512588065  | 1.4100096998  |
| O | 2.6561443462  | -2.5273332463 | 0.4479542559  |
| C | 3.663750636   | -0.6304993265 | 1.9933446765  |
| H | 3.8217263864  | 0.2984369038  | 2.540516964   |
| H | 3.7063674552  | -1.4835093426 | 2.6754289703  |
| H | 4.4211105069  | -0.7470741504 | 1.215836537   |
| O | -2.5118493429 | -2.7587799448 | -0.0094167309 |
| O | -1.7229722926 | -2.6089256082 | -2.13999519   |
| C | -3.7899417717 | -3.1460857365 | -0.5476565245 |
| H | -4.4347092613 | -3.3039491743 | 0.3173567464  |
| H | -4.2030105535 | -2.3596686687 | -1.1845573777 |
| H | -3.7060278321 | -4.0701608497 | -1.1259949503 |

# TS1(1c\_t2)

|   |               |              |               |
|---|---------------|--------------|---------------|
| C | -0.5019641214 | 0.7295759258 | -0.1495849302 |
| N | -0.8137856799 | 0.152243205  | 0.9976846996  |
| C | -1.9183853266 | 0.6986037352 | 1.809576201   |
| N | -1.2824533624 | 1.6645995421 | -0.7722377732 |
| C | -0.8500828547 | 2.6740648325 | -1.7574534807 |
| N | 0.6394460553  | 0.3861952783 | -0.8069928077 |
| C | 1.7574785831  | -0.366491553 | -0.2507124215 |
| C | 3.0689170331  | 0.255698076  | -0.599238231  |
| H | 1.6220403362  | -0.409295396 | 0.8320377627  |

H 1.7561822698 -1.3952926188 -0.6262789975  
O 3.338367757 1.496676982 -0.0779013903  
C 4.5834989703 1.8556396252 -0.5116734221  
C 5.1150526956 0.8756175914 -1.2911763299  
C 4.1272960536 -0.1648270525 -1.3503539768  
H 4.1942866275 -1.1045469731 -1.8811011793  
H 6.0856995697 0.8887762051 -1.7671962885  
H 4.9386223976 2.8213817449 -0.1836174988  
C -1.5974818964 0.6040521741 3.30770645  
H -2.0084009069 1.7712900718 1.5878918113  
C -3.2701739854 0.0356015572 1.4975585542  
H -2.184636887 1.8370292782 -0.3535173674  
C -2.1078204068 3.3191986654 -2.3413271021  
C 0.0969495475 3.714062103 -1.1467769931  
H -0.3315828653 2.1629194472 -2.5770762663  
H 0.4055909315 4.4367811038 -1.9096922158  
H -0.4013524256 4.2590762381 -0.3373010248  
H 0.9980418956 3.2422617302 -0.7446925595  
H -2.336698416 1.1780971357 3.8768387768  
H -1.6375667174 -0.4263736818 3.6715807958  
H -0.6065261498 1.013439797 3.5239647546  
H -4.0693332032 0.514863377 2.0737274278  
H -3.52578295 0.1124377248 0.4355112811  
H -3.2527393809 -1.0264507265 1.7621942263  
H 0.7019488713 0.6149733024 -1.7884977899  
H -1.8343533041 4.0492544004 -3.1081449358  
H -2.760937811 2.5682187216 -2.7968935294  
H -2.6736040222 3.8430832301 -1.5615965117  
C -0.7050363391 -1.8785243466 0.9428388946  
C -0.8844170892 -2.4989741513 -0.131939429  
C -0.3807427799 -2.2364171447 2.3353702694  
C -1.0011994249 -2.6217599328 -1.5423989002  
O 0.7421831297 -1.6474053192 2.7756534403  
O -1.0306367339 -3.0297986235 2.9927915947  
C 1.1505497561 -1.9960980778 4.1151865203  
H 2.0724921483 -1.4423169654 4.2907949465  
H 0.388029817 -1.7007224502 4.8397403257  
H 1.3323845845 -3.0704368846 4.1944070585  
O -2.2999614214 -2.6646465583 -1.9456195604  
O -0.0552731592 -2.7339546299 -2.3180010969  
C -2.5002826155 -2.8439482462 -3.359097346  
H -3.5813453308 -2.8693574301 -3.5005446955  
H -2.0690958181 -2.0142166277 -3.9259131143  
H -2.0556786454 -3.7819574113 -3.7024516254

#### 10c\_t1

C 1.1357824444 -0.7699574542 0.2217579543  
N 1.4968028488 -0.8380484075 1.5132304214  
N -0.0465948505 -0.2279701074 -0.1703393839  
N 1.9833065116 -1.2547227997 -0.7081770816

C 3.1532931377 -2.1279983744 -0.492367256  
H 1.8952953889 -0.8836807361 -1.6459954854  
H 2.4825929382 -0.989360049 1.6853830374  
C 0.6595589685 -0.8509998344 2.727174727  
C -0.4897978127 -0.4282903764 -1.5802150473  
C 4.4481462842 -1.3082032366 -0.447350188  
C 3.1818682597 -3.187089449 -1.596816714  
H 3.003498091 -2.6291962816 0.4681942849  
H -0.3767799008 -0.7840673336 2.4013850255  
C 0.8581005707 -2.185468958 3.4548682864  
C 1.009494378 0.3440441691 3.6182568699  
H -0.1227647612 -1.3992760786 -1.9199933674  
H -0.0450753574 0.3520620394 -2.2084599921  
C -1.9661412677 -0.3935416408 -1.7680650196  
H 0.2425087728 -2.2140560854 4.3596656223  
H 0.5729258515 -3.0280960166 2.8173086006  
H 1.9046897805 -2.3162675963 3.7542570271  
H 0.3665097079 0.3551966475 4.5040575999  
H 2.0500796068 0.2802727833 3.9577983131  
H 0.8792014541 1.2862071047 3.0801691905  
H 4.0358864702 -3.8553941583 -1.4519646597  
H 2.26696447 -3.7870379043 -1.5902020698  
H 3.2830519303 -2.7185665199 -2.5826947959  
H 5.3021760934 -1.9621960881 -0.2451162234  
H 4.6192749402 -0.8086324317 -1.4075376382  
H 4.4092373687 -0.5413510161 0.3328034418  
C -2.8314931799 0.5749827593 -2.1883864524  
C -4.1382279839 -0.0158297274 -2.1912168306  
C -3.9695244607 -1.3025590827 -1.7776015322  
O -2.6540346576 -1.5531535784 -1.5235368604  
H -4.6465326432 -2.1315075243 -1.6331796028  
H -5.0718432715 0.4536916885 -2.4680322522  
H -2.5668509927 1.5877653095 -2.4587185248  
C -0.552162985 1.0138455429 0.4732431072  
C 0.0829967766 2.191274454 0.4106274361  
C -1.8809181218 0.8990282959 1.1399940058  
C 1.3580536367 2.4147879364 -0.1958545855  
O -2.3113592165 -0.3857496485 1.2519889625  
O -2.5388661065 1.8339967012 1.5643908968  
C -3.5993345 -0.5588396833 1.8658765678  
H -3.8029175588 -1.6293773223 1.8271757748  
H -3.584859782 -0.2169211935 2.9045564761  
H -4.3684041237 -0.0090033826 1.3186657276  
O 1.2474067881 2.7728493014 -1.5244014986  
O 2.4492937979 2.4292220663 0.3800822607  
C 2.4653888423 3.2002100091 -2.1489576194  
H 2.1985167162 3.459207847 -3.175357793  
H 2.8864486289 4.0758266981 -1.6452995696  
H 3.2157400794 2.4036937232 -2.1533045738

## 10c\_t2

|   |               |               |               |
|---|---------------|---------------|---------------|
| C | 0.0316275224  | -0.8558980099 | -0.0685966063 |
| N | 1.2804770928  | -0.5220895864 | -0.4677038478 |
| C | 1.9803907276  | -1.2662114357 | -1.5593334803 |
| N | -0.4029636695 | -2.1228082139 | -0.210676633  |
| C | -1.7758168238 | -2.5921007046 | -0.5000654968 |
| N | -0.7542885446 | 0.0984786334  | 0.4697295499  |
| C | -1.6655467519 | -0.0659075109 | 1.6103361512  |
| C | -2.9811542041 | 0.6071114634  | 1.405947915   |
| H | -1.7934265534 | -1.1307495811 | 1.8130813542  |
| H | -1.2053830605 | 0.3787530129  | 2.4999719179  |
| O | -3.8074259696 | 0.1124928378  | 0.4292595779  |
| C | -4.9433137816 | 0.8726789766  | 0.4360230979  |
| C | -4.8617195928 | 1.8347806893  | 1.3939971138  |
| C | -3.5830039227 | 1.6636921789  | 2.0234462577  |
| H | -3.1639393877 | 2.2498635765  | 2.8296039649  |
| H | -5.6134146965 | 2.5767705266  | 1.6243190719  |
| H | -5.6960121262 | 0.604127985   | -0.2902759858 |
| C | 3.1157198657  | -2.1561694528 | -1.0419882736 |
| H | 1.2199225175  | -1.9061504913 | -2.0124621697 |
| C | 2.4701161335  | -0.3021511644 | -2.6438581612 |
| H | 0.317963963   | -2.817838471  | -0.3638575798 |
| C | -1.8689341539 | -3.0502479919 | -1.9600603627 |
| C | -2.1534100682 | -3.7142403519 | 0.4697408724  |
| H | -2.4436636971 | -1.7422397505 | -0.3567218521 |
| H | -3.1729104451 | -4.0569847945 | 0.2684189077  |
| H | -1.4795361605 | -4.5707601394 | 0.3513190292  |
| H | -2.1011397435 | -3.3810621844 | 1.5106159121  |
| H | 3.5339732221  | -2.7246832974 | -1.8789286954 |
| H | 3.9254902089  | -1.5617053759 | -0.6069692861 |
| H | 2.7636272135  | -2.8633779287 | -0.2865426596 |
| H | 2.8995690225  | -0.883155557  | -3.4665998491 |
| H | 1.6481882417  | 0.2994655969  | -3.0407192881 |
| H | 3.2402876472  | 0.3756401131  | -2.2666545343 |
| H | -0.5015798304 | 1.0669632092  | 0.235798223   |
| H | -2.8827087243 | -3.4022013791 | -2.1771214996 |
| H | -1.6368460841 | -2.2319828234 | -2.6484142598 |
| H | -1.1754949383 | -3.8764279413 | -2.1551621133 |
| C | 2.0211173482  | 0.5322285876  | 0.2582296555  |
| C | 2.0009556249  | 1.8390445685  | -0.0281166488 |
| C | 2.7921357255  | 0.0406912674  | 1.4415612648  |
| C | 1.1177222966  | 2.4598717672  | -0.9519018124 |
| O | 2.3806114615  | -1.1850581854 | 1.8588198554  |
| O | 3.6676812194  | 0.658840942   | 2.0224393303  |
| C | 3.058466483   | -1.7079761552 | 3.0137368571  |
| H | 2.6089814682  | -2.6831028583 | 3.2043442308  |
| H | 4.1287866795  | -1.8186934465 | 2.8204674407  |
| H | 2.9173027828  | -1.0535959947 | 3.8780412635  |
| O | 1.7225125323  | 2.9867165679  | -2.0554367664 |
| O | -0.0954616218 | 2.6502072864  | -0.7322622768 |

|   |              |              |               |
|---|--------------|--------------|---------------|
| C | 0.8673428896 | 3.7139290761 | -2.9502119931 |
| H | 1.5043174086 | 4.0221620118 | -3.7809457538 |
| H | 0.0514109461 | 3.0876223405 | -3.3222316001 |
| H | 0.4426513075 | 4.5966915624 | -2.4632803291 |

#### TS2(1c\_t1)

|   |               |               |               |
|---|---------------|---------------|---------------|
| C | 0.9788304484  | -0.7834837963 | 0.3562806014  |
| N | 1.4116149582  | -0.6701910588 | 1.6212647075  |
| N | -0.197209762  | -0.2372612902 | -0.0536473577 |
| N | 1.7407744476  | -1.4613493775 | -0.5237733921 |
| C | 2.8768716597  | -2.3563177596 | -0.2285777847 |
| H | 1.604625892   | -1.2539596935 | -1.5048140489 |
| H | 2.382574207   | -0.9116710915 | 1.7752639397  |
| C | 0.6528227994  | -0.4034411166 | 2.8584464243  |
| C | -0.7081547761 | -0.6062780542 | -1.4025598626 |
| C | 4.2120484433  | -1.6113320771 | -0.3464215895 |
| C | 2.8056384588  | -3.5582519492 | -1.1729773486 |
| H | 2.7448361603  | -2.7115200046 | 0.7976982892  |
| H | -0.3671576475 | -0.1621747371 | 2.5670449483  |
| C | 0.6282181082  | -1.6691636621 | 3.7228310818  |
| C | 1.2823290181  | 0.7830972     | 3.5936073935  |
| H | -0.4299828066 | -1.643919553  | -1.6001892637 |
| H | -0.2320626184 | 0.0302258728  | -2.158910489  |
| C | -2.1837900986 | -0.485071374  | -1.5595779238 |
| H | 0.0721334311  | -1.4801085419 | 4.6468414236  |
| H | 0.1463920941  | -2.4984428126 | 3.1955563087  |
| H | 1.6444438949  | -1.9760036905 | 3.9963782577  |
| H | 0.6892868026  | 1.0322439323  | 4.4793907688  |
| H | 2.2953587556  | 0.5302865087  | 3.9300769092  |
| H | 1.3465638334  | 1.6648133395  | 2.9488572994  |
| H | 3.6291091945  | -4.247083535  | -0.9630055185 |
| H | 1.8619844891  | -4.0985161286 | -1.0522080493 |
| H | 2.891775058   | -3.2376527101 | -2.2177680202 |
| H | 5.0405511961  | -2.283909308  | -0.1029800992 |
| H | 4.357390978   | -1.2442053986 | -1.3684006433 |
| H | 4.2558404061  | -0.7544733899 | 0.3333796375  |
| C | -2.9869304247 | 0.4565291438  | -2.1356772869 |
| C | -4.3330287605 | -0.0234527842 | -2.0157146782 |
| C | -4.2479510295 | -1.2250615512 | -1.3802071252 |
| O | -2.9479095359 | -1.5266124866 | -1.1020710694 |
| H | -4.9798710404 | -1.959961567  | -1.0791806208 |
| H | -5.2366966811 | 0.4597090964  | -2.3600929843 |
| H | -2.6564531812 | 1.3814449409  | -2.587650763  |
| C | -0.5730733439 | 1.1367447744  | 0.4087524329  |
| C | 0.2259353716  | 2.1645281793  | 0.2675724797  |
| C | -1.9342309117 | 1.24609454    | 1.0286651969  |
| C | 1.1302909073  | 3.1892098711  | 0.2506648654  |
| O | -2.4299761466 | 0.050959696   | 1.4346393905  |
| O | -2.5346376508 | 2.291774455   | 1.2032412271  |
| C | -3.7257869416 | 0.0927937042  | 2.0589909296  |

|   |               |              |               |
|---|---------------|--------------|---------------|
| H | -3.9830403209 | -0.944660047 | 2.274175187   |
| H | -3.6902439716 | 0.6710267387 | 2.9863406961  |
| H | -4.4661432922 | 0.5340176749 | 1.3882698884  |
| O | 1.0884721809  | 3.927932148  | -0.9343292057 |
| O | 1.9316572866  | 3.4902364918 | 1.163778528   |
| C | 1.9959331143  | 5.0278544897 | -0.9853356281 |
| H | 1.8430759218  | 5.4932602544 | -1.9622594157 |
| H | 1.7951345549  | 5.7635478863 | -0.1986467703 |
| H | 3.0390768699  | 4.7051576084 | -0.8969198734 |

# **TS2(1c\_t2)**

|   |               |               |               |
|---|---------------|---------------|---------------|
| C | -0.1756082635 | -1.1026548683 | 0.1198078412  |
| N | 1.0657848002  | -0.7830344228 | -0.2940175929 |
| C | 1.7929362574  | -1.5979986296 | -1.3154029117 |
| N | -0.6207231425 | -2.3730629518 | 0.0339251001  |
| C | -1.9954897017 | -2.8362948769 | -0.2657527691 |
| N | -0.9719397145 | -0.1309799625 | 0.6223343927  |
| C | -1.8766157412 | -0.2641136086 | 1.7765482486  |
| C | -3.1708730155 | 0.4465309712  | 1.5721447049  |
| H | -2.0338779929 | -1.3242250867 | 1.9805624365  |
| H | -1.3949965272 | 0.1687749291  | 2.6599723715  |
| O | -4.0149947652 | -0.0348037098 | 0.6044055751  |
| C | -5.1265148792 | 0.7603619857  | 0.6055121347  |
| C | -5.0116203773 | 1.7317530343  | 1.5507762097  |
| C | -3.7366439771 | 1.5291781206  | 2.178312949   |
| H | -3.2965370113 | 2.1124215723  | 2.9752759219  |
| H | -5.7389798347 | 2.4997496144  | 1.7739200451  |
| H | -5.8898214224 | 0.5069753687  | -0.1152382683 |
| C | 2.9371945495  | -2.4114404267 | -0.7024163542 |
| H | 1.0537833327  | -2.2919287792 | -1.7216271185 |
| C | 2.2761015767  | -0.7267069103 | -2.479505157  |
| H | 0.093316898   | -3.0761212056 | -0.1125590877 |
| C | -2.0799822743 | -3.3063540267 | -1.7225040952 |
| C | -2.3848359408 | -3.9476705997 | 0.7111086946  |
| H | -2.6609683524 | -1.9824232199 | -0.1355319191 |
| H | -3.4034279782 | -4.2896008948 | 0.5041252708  |
| H | -1.7123052865 | -4.8070134189 | 0.6063768974  |
| H | -2.3404957816 | -3.6045442586 | 1.7491434752  |
| H | 3.3808411473  | -3.0473442828 | -1.4755335648 |
| H | 3.7248683731  | -1.7612819249 | -0.3099414524 |
| H | 2.5839666737  | -3.0526149846 | 0.1099381717  |
| H | 2.6705434265  | -1.3810064958 | -3.2637467085 |
| H | 1.4573951327  | -0.1380093614 | -2.9028551945 |
| H | 3.0729837971  | -0.0425726455 | -2.1767591741 |
| H | -0.6218992849 | 0.8096532625  | 0.4713120182  |
| H | -3.0943748089 | -3.6537211226 | -1.944167699  |
| H | -1.8376231137 | -2.4960036809 | -2.4165598382 |
| H | -1.390507127  | -4.1387416088 | -1.9045066242 |
| C | 1.6886186674  | 0.4788027839  | 0.1841724618  |
| C | 1.4292164206  | 1.6400175377  | -0.36851297   |

|   |              |               |               |
|---|--------------|---------------|---------------|
| C | 2.584874765  | 0.3246907847  | 1.3789634794  |
| C | 1.0362016592 | 2.877598424   | -0.7922706844 |
| O | 2.4071732373 | -0.8557098922 | 2.0198996959  |
| O | 3.3662396675 | 1.1717542425  | 1.77447667    |
| C | 3.2166154198 | -1.0551448729 | 3.1929997529  |
| H | 2.9478020106 | -2.0409729595 | 3.5735212134  |
| H | 4.2797790369 | -1.026070081  | 2.9406798586  |
| H | 3.005271392  | -0.2906095572 | 3.9451563379  |
| O | 1.8273440304 | 3.3901878662  | -1.8190050991 |
| O | 0.0605881844 | 3.5201790697  | -0.3429116078 |
| C | 1.4032976284 | 4.6569029775  | -2.3228334242 |
| H | 2.1076603895 | 4.9101573985  | -3.1189406938 |
| H | 0.3890872865 | 4.6160350733  | -2.735038344  |
| H | 1.4317855539 | 5.4349373109  | -1.5524435763 |

### 11c\_t1

|   |               |               |               |
|---|---------------|---------------|---------------|
| C | 1.3463368044  | -1.275982676  | 0.0436109793  |
| N | 1.7657832628  | -1.149476014  | 1.3124052685  |
| N | 0.2487820302  | -0.615313759  | -0.4158503534 |
| N | 2.0270048617  | -2.0913106778 | -0.7822174402 |
| C | 3.0016312092  | -3.1378838325 | -0.4166916209 |
| H | 1.9345738314  | -1.9192556117 | -1.7754471679 |
| H | 2.7103195043  | -1.4616574435 | 1.500172215   |
| C | 0.9986820483  | -0.7698785866 | 2.5146488178  |
| C | -0.3056488417 | -1.0093607281 | -1.7397170107 |
| C | 4.4398793263  | -2.6231655847 | -0.5445240926 |
| C | 2.7507144013  | -4.3634007714 | -1.2983942584 |
| H | 2.8006327556  | -3.4075069174 | 0.624084929   |
| H | -0.0164114874 | -0.5490091206 | 2.1886171243  |
| C | 0.9559982659  | -1.9648568835 | 3.4741697315  |
| C | 1.6204917031  | 0.4664500202  | 3.1702000095  |
| H | -0.157293875  | -2.0837455504 | -1.8682650285 |
| H | 0.24412292    | -0.484589184  | -2.531136205  |
| C | -1.7551018804 | -0.7130165905 | -1.9070115192 |
| H | 0.3829888659  | -1.7054707916 | 4.3701716779  |
| H | 0.4837176766  | -2.8325161833 | 3.0029504983  |
| H | 1.9663925756  | -2.2497125575 | 3.7903819006  |
| H | 1.0481423561  | 0.7422846129  | 4.0619411788  |
| H | 2.6497562134  | 0.2568685957  | 3.4856263796  |
| H | 1.6336169453  | 1.3210486803  | 2.4882855731  |
| H | 3.4503006131  | -5.1620967819 | -1.0348472556 |
| H | 1.7312719411  | -4.7391716603 | -1.1697466939 |
| H | 2.9005534761  | -4.1187555198 | -2.3564272563 |
| H | 5.1464093836  | -3.4066833402 | -0.2530183219 |
| H | 4.6546855667  | -2.3358166457 | -1.579765006  |
| H | 4.6129678073  | -1.7515872005 | 0.0947250344  |
| C | -2.4371113576 | 0.2929248356  | -2.5285665965 |
| C | -3.8322966796 | -0.0016748965 | -2.3747647268 |
| C | -3.8948226075 | -1.1685804254 | -1.6751464879 |
| O | -2.6410146113 | -1.6205693434 | -1.3887403997 |

H -4.7116816426 -1.7865128051 -1.3323704545  
H -4.6706030724 0.574956226 -2.7400681005  
H -1.9955875102 1.1424612888 -3.0308187993  
C 0.0722097995 0.8094746951 -0.066437229  
C 1.0334410376 1.6820873275 -0.3965388642  
C -1.2086123468 1.1600465782 0.6091149084  
C 1.0087435671 3.0727982394 -0.0482918671  
O -1.9182451781 0.0789412483 1.0248970832  
O -1.5970684418 2.3003385799 0.8054999666  
C -3.1713502941 0.3658877254 1.670032978  
H -3.6159813415 -0.6040914346 1.8942179517  
H -3.0133714631 0.9294281073 2.5936321264  
H -3.8268201799 0.9370209644 1.0086327594  
O 0.5709040994 3.8668154413 -1.0800141986  
O 1.4865928388 3.5615854347 0.9795700813  
C 0.655364745 5.276826078 -0.8477658403  
H 0.2993080917 5.7523734031 -1.7640100161  
H 0.0245898171 5.5833404145 -0.007139531  
H 1.6842404697 5.590750021 -0.6457738302

#### 11c\_t2

C -0.6699145895 -0.9122634552 -0.0618201722  
N 0.624080166 -1.16187564 -0.3714721516  
C 0.9923927054 -2.3418534599 -1.2211063113  
N -1.5347320171 -1.9363302668 0.0788690035  
C -2.9763583247 -1.9640092712 -0.2547452801  
N -1.0642096116 0.3672280962 0.0840802458  
C -2.0027927942 0.890145854 1.0876507757  
C -2.9440483638 1.8998335651 0.5231318089  
H -2.5422807988 0.0560737262 1.5397301375  
H -1.4325476291 1.3779919452 1.8856320678  
O -3.8744639312 1.4641724196 -0.385525984  
C -4.6201374842 2.5489642506 -0.7531119563  
C -4.1903525993 3.6611985677 -0.098557152  
C -3.0971337377 3.238977813 0.7304106501  
H -2.5011721562 3.8505611324 1.393634748  
H -4.5952880615 4.6589725222 -0.193882576  
H -5.4003081017 2.3632677368 -1.4762513269  
C 1.7261617623 -3.4430276409 -0.4497474815  
H 0.0434585817 -2.7513203762 -1.573736647  
C 1.7810509333 -1.8956816298 -2.4566809407  
H -1.113381585 -2.8506735393 0.1919490002  
C -3.194214529 -2.7715461377 -1.5395341877  
C -3.7679395327 -2.544200077 0.9195379213  
H -3.2858783964 -0.9337459612 -0.4332707978  
H -4.8363279104 -2.5553662187 0.6832295506  
H -3.4561996291 -3.5750724795 1.1240139629  
H -3.6225176045 -1.9569323767 1.8312004413  
H 1.8576935338 -4.3083202626 -1.1080357062  
H 2.7178980825 -3.1186206443 -0.1224407389



|   |               |               |               |
|---|---------------|---------------|---------------|
| H | 1.1620306222  | -3.7639837684 | 0.4301997035  |
| H | 1.8920908967  | -2.7511160546 | -3.1309002852 |
| H | 1.2591683967  | -1.0987785468 | -2.9942738887 |
| H | 2.780537474   | -1.5368822813 | -2.1964096933 |
| H | -0.3493751721 | 1.0229807466  | -0.2497591083 |
| H | -4.2604892644 | -2.8003171702 | -1.786423258  |
| H | -2.6600207278 | -2.3256960218 | -2.3839342108 |
| H | -2.848337396  | -3.8041664677 | -1.4146014454 |
| C | 1.6622831868  | -0.1709098599 | -0.0662419757 |
| C | 1.6842893257  | 1.0153403176  | -0.6925861792 |
| C | 2.5837701452  | -0.5447394924 | 1.0500694246  |
| C | 2.6202616169  | 2.0632868837  | -0.3674301619 |
| O | 2.04539365    | -1.4557556592 | 1.8971252914  |
| O | 3.6829603258  | -0.0498443667 | 1.2383542923  |
| C | 2.8697245974  | -1.8308757485 | 3.0148879253  |
| H | 2.2889128707  | -2.5620424264 | 3.578057593   |
| H | 3.8077456617  | -2.2775379989 | 2.6747178409  |
| H | 3.0924382923  | -0.9636231607 | 3.6419793099  |
| O | 3.6837254365  | 2.089189922   | -1.2331558897 |
| O | 2.4428170743  | 2.9516480801  | 0.4650908835  |
| C | 4.592626649   | 3.1820115031  | -1.0573873906 |
| H | 5.3481462811  | 3.0704671958  | -1.837631535  |
| H | 4.0871662799  | 4.1462328961  | -1.1681218951 |
| H | 5.0729994003  | 3.1478892864  | -0.0744052505 |

### TS3(1c\_t1)

|   |               |               |               |
|---|---------------|---------------|---------------|
| C | 0.0019139417  | -1.66046243   | -0.2782634614 |
| N | -1.0255299899 | -2.5429227578 | -0.1916520959 |
| N | -0.3124162391 | -0.3034362131 | -0.3530671063 |
| N | 1.263319272   | -2.0244892677 | -0.3311522926 |
| C | 1.7805275989  | -3.3512528431 | 0.0237628266  |
| H | 1.9323177382  | -1.0263590812 | -0.482567973  |
| H | -0.7691915271 | -3.5148896118 | -0.3177834429 |
| C | -2.3087585274 | -2.3400048887 | 0.5154885245  |
| C | -1.2487896776 | 0.0858111484  | -1.4528121853 |
| C | 3.118909973   | -3.1764398283 | 0.7490932919  |
| C | 1.9266216895  | -4.2298282036 | -1.2261172733 |
| H | 1.0746923788  | -3.8336987475 | 0.7132490494  |
| H | -2.4191471541 | -1.2655422999 | 0.6663955979  |
| C | -3.4628667463 | -2.8527060063 | -0.3489796126 |
| C | -2.2737103789 | -3.0357238186 | 1.8815159935  |
| H | -1.7975394292 | -0.8109587464 | -1.7453620537 |
| H | -0.6520442608 | 0.4029565628  | -2.3162794222 |
| C | -2.2041068948 | 1.1845536166  | -1.1437102577 |
| H | -4.4165049071 | -2.7008233607 | 0.1662615484  |
| H | -3.5062284933 | -2.3317960961 | -1.3101744703 |
| H | -3.3538463775 | -3.925777121  | -0.5460567314 |
| H | -3.2228477771 | -2.8851597398 | 2.4065791448  |
| H | -2.1198406187 | -4.1149771662 | 1.7650671775  |
| H | -1.4700647714 | -2.6387472305 | 2.5093250151  |

|   |               |               |               |
|---|---------------|---------------|---------------|
| H | 2.319552642   | -5.2151795694 | -0.9543429885 |
| H | 0.9646260299  | -4.3745812369 | -1.7290588503 |
| H | 2.6180378315  | -3.7688672608 | -1.9400500251 |
| H | 3.507103968   | -4.1497965276 | 1.0645025919  |
| H | 3.8614691036  | -2.7121873384 | 0.0904616119  |
| H | 3.0060308719  | -2.5458028122 | 1.6364649131  |
| C | -2.3129134459 | 2.464374445   | -1.6057484268 |
| C | -3.4805649213 | 3.0264708222  | -0.9894381199 |
| C | -3.99680698   | 2.0466496508  | -0.1981198503 |
| O | -3.2393280873 | 0.9142855132  | -0.2879776687 |
| H | -4.858460084  | 1.9904561504  | 0.4504058013  |
| H | -3.8783634681 | 4.0232420449  | -1.1197063863 |
| H | -1.6400390336 | 2.9465813145  | -2.3012924417 |
| C | 0.7159595296  | 0.6756248569  | -0.0617350177 |
| C | 2.0088431366  | 0.4202933705  | -0.3252349794 |
| C | 0.2740000555  | 1.8982487573  | 0.6811766864  |
| C | 3.1233669031  | 1.2591510751  | 0.0873064476  |
| O | -0.8014022613 | 1.6764581737  | 1.4653194019  |
| O | 0.8669831281  | 2.9636832682  | 0.6540781709  |
| C | -1.240734542  | 2.8001096758  | 2.2508451842  |
| H | -2.1308619444 | 2.4590926388  | 2.7796382216  |
| H | -0.4682147672 | 3.0959336495  | 2.965952267   |
| H | -1.4841817683 | 3.6512337977  | 1.6111470119  |
| O | 3.5986633618  | 2.0154784399  | -0.9402728558 |
| O | 3.6854266608  | 1.2046656737  | 1.1753773821  |
| C | 4.7743564698  | 2.7863953397  | -0.6478490934 |
| H | 5.0214312204  | 3.3122874752  | -1.5714256778 |
| H | 4.5837750078  | 3.5094345281  | 0.1505409409  |
| H | 5.6073445614  | 2.1421202151  | -0.3520960421 |

### TS3(1c\_t2)

|   |               |               |               |
|---|---------------|---------------|---------------|
| C | -0.3539258542 | -1.0405115577 | 0.1978062057  |
| N | 0.9648660634  | -0.8792444652 | -0.1912200056 |
| C | 1.5563556916  | -1.8804906615 | -1.149908236  |
| N | -0.7642777141 | -2.3101932909 | 0.4553394975  |
| C | -2.0870480785 | -2.9108791707 | 0.1829689173  |
| N | -1.1102327611 | 0.038750707   | 0.3022732132  |
| C | -2.260989235  | 0.1953970512  | 1.192143793   |
| C | -3.4788055278 | 0.7004969189  | 0.4885542416  |
| H | -2.4755745623 | -0.73391648   | 1.7279467518  |
| H | -2.0031523296 | 0.944232972   | 1.9509374344  |
| O | -4.0577860905 | -0.113672846  | -0.4514877065 |
| C | -5.1482906978 | 0.5466341099  | -0.946207758  |
| C | -5.2787603553 | 1.7583694895  | -0.3428281447 |
| C | -4.1906731113 | 1.8595853868  | 0.5887431844  |
| H | -3.9655702277 | 2.6869166971  | 1.2475371361  |
| H | -6.048412661  | 2.4924395532  | -0.5369334915 |
| H | -5.7101063554 | 0.0270760538  | -1.7080287364 |
| C | 2.6146823468  | -2.802052644  | -0.531964583  |
| H | 0.7148221042  | -2.5084821733 | -1.4469648045 |

C 2.0714987885 -1.1913667535 -2.4182981495  
H -0.0202377247 -2.9869171731 0.5735251344  
C -1.9940859705 -3.8569697061 -1.0205335246  
C -2.597275444 -3.6370219486 1.4306033669  
H -2.7672611666 -2.0972713237 -0.0699795468  
H -3.5816116666 -4.0753441725 1.2382691002  
H -1.9154375804 -4.4483568003 1.7113327845  
H -2.6837674769 -2.9561124743 2.2829014065  
H 2.8124377749 -3.6244587171 -1.227905456  
H 3.5583188044 -2.2849785208 -0.3471009201  
H 2.2732405966 -3.2333767136 0.4141357022  
H 2.3655660206 -1.958235688 -3.1421259816  
H 1.2958906254 -0.5699374554 -2.8757314445  
H 2.9469062471 -0.5645283077 -2.2241120893  
H -0.427221404 0.9995316349 -0.0106496224  
H -2.970051995 -4.312480747 -1.2182707596  
H -1.6786541244 -3.3221419002 -1.9216468531  
H -1.2781563427 -4.6646388672 -0.8277872516  
C 1.5990210164 0.4127930914 -0.0606641787  
C 0.8896159839 1.5499416275 -0.1599429005  
C 3.033793046 0.42929872 0.374448834  
C 1.4138053611 2.8732232867 0.1478344375  
O 3.2871469975 -0.4782933288 1.3404218451  
O 3.865157075 1.2268189512 -0.0231380844  
C 4.6317537245 -0.4807128934 1.8605961473  
H 4.6605989998 -1.2860703663 2.5946313979  
H 5.3566603153 -0.6678900267 1.0646263073  
H 4.8600384579 0.4747568265 2.3395122143  
O 1.6281600351 3.6056298389 -0.9798705432  
O 1.5326712497 3.3524811887 1.2698932581  
C 2.0459146508 4.9631237032 -0.766768227  
H 2.1607360772 5.3974273242 -1.7611129698  
H 1.2966909591 5.5233070934 -0.2000430399  
H 2.9992544442 5.0038179477 -0.2320123023

#### 12c\_t1

C -1.1022208954 0.2975663319 0.7228680268  
N -1.5442746226 -0.6027126762 1.5257557622  
N 0.1572831491 0.2815209811 0.0373613512  
N -1.8237289715 1.4572259216 0.5059643474  
C -3.0907035863 1.7243987142 1.1982380696  
H -1.8167095737 1.7594444117 -0.4625397539  
C -0.7580059836 -1.72255194 2.0295514231  
C 0.7393098631 1.5697722032 -0.4405653477  
C -4.2744154987 0.9731123281 0.5734836548  
C -3.3281552048 3.236988913 1.2137319281  
H -2.9568267619 1.3692845376 2.2238977742  
H 0.2663834964 -1.7276494879 1.6388379513  
C -0.6646509683 -1.6065229397 3.5588182035  
C -1.4391334077 -3.0376367174 1.6256451722

|   |               |               |               |
|---|---------------|---------------|---------------|
| H | 0.3214511305  | 2.3523575634  | 0.1933045818  |
| H | 0.4170332107  | 1.7617393933  | -1.4707769551 |
| C | 2.2259658422  | 1.6519535595  | -0.4041673113 |
| H | -0.1119549549 | -2.4530036969 | 3.9822491718  |
| H | -0.1502174186 | -0.684354331  | 3.8500697106  |
| H | -1.6657064329 | -1.5909582886 | 4.0053220914  |
| H | -0.8813397399 | -3.9007387304 | 2.0059138619  |
| H | -2.4560941219 | -3.0807722248 | 2.0328041753  |
| H | -1.5094380578 | -3.1293295008 | 0.5368185226  |
| H | -4.2521918402 | 3.4754086935  | 1.7504305695  |
| H | -2.5002964352 | 3.7604122962  | 1.7027746169  |
| H | -3.4240918737 | 3.6290728368  | 0.1936478144  |
| H | -5.1957946494 | 1.1756384292  | 1.1310182408  |
| H | -4.4307775359 | 1.2888810146  | -0.4645561977 |
| H | -4.0975050523 | -0.1052461891 | 0.5853302946  |
| C | 3.184103455   | 1.594665032   | -1.375849436  |
| C | 4.4451319192  | 1.7942144417  | -0.7217420906 |
| C | 4.1597924418  | 1.9609204589  | 0.5994407102  |
| O | 2.8147698693  | 1.8858575382  | 0.8105296503  |
| H | 4.7671021696  | 2.1466404054  | 1.473065035   |
| H | 5.426194475   | 1.8143230046  | -1.1754507472 |
| H | 3.0089886667  | 1.4325167451  | -2.4305266434 |
| C | 0.5568693809  | -0.8673679447 | -0.6802203231 |
| C | -0.2034381411 | -1.5404239777 | -1.5689618545 |
| C | 1.9373625387  | -1.4479586719 | -0.4405782921 |
| C | -1.5231010114 | -1.1115343358 | -2.0813100581 |
| O | 2.4469317031  | -1.1037235748 | 0.7481976452  |
| O | 2.4944357278  | -2.1889795501 | -1.2295043214 |
| C | 3.7440014138  | -1.6572561899 | 1.0580686513  |
| H | 4.0184655069  | -1.2316659028 | 2.0224424915  |
| H | 3.684216872   | -2.7463804284 | 1.1260188692  |
| H | 4.4728441261  | -1.3774894122 | 0.2954703452  |
| O | -2.1956090124 | -2.1691200174 | -2.5717842859 |
| O | -1.9472111572 | 0.0322614296  | -2.1210466301 |
| C | -3.4810239748 | -1.8835248652 | -3.1623797986 |
| H | -3.8668171777 | -2.844939854  | -3.5001018475 |
| H | -4.1540149603 | -1.4433980979 | -2.422955012  |
| H | -3.3706471359 | -1.2003954241 | -4.0080272902 |
| H | 0.1825372     | -2.4705952147 | -1.9693375174 |

#### E-12c\_t1

|   |               |               |               |
|---|---------------|---------------|---------------|
| C | 0.2479265528  | -1.657630835  | -0.6646462071 |
| N | 0.1142239251  | -2.1429554644 | 0.6108109568  |
| N | -0.0096420399 | -0.2463834861 | -0.8083697372 |
| N | 0.5899416591  | -2.3042027214 | -1.719880139  |
| C | 0.7093367193  | -3.7636046584 | -1.698891078  |
| H | 2.1512708063  | -0.5824719144 | 0.8082245303  |
| H | 0.3806683535  | -3.1144486367 | 0.7144672817  |
| C | -0.8116351594 | -1.6698202382 | 1.6578607334  |
| C | -0.7233224919 | 0.176507147   | -2.0420802363 |

|   |               |               |               |
|---|---------------|---------------|---------------|
| C | 2.1567102783  | -4.1771428612 | -1.3882584609 |
| C | 0.2623406577  | -4.3048203805 | -3.0610972345 |
| H | 0.0535403599  | -4.2067603226 | -0.9306965808 |
| H | -0.968368736  | -0.6021869086 | 1.4956216123  |
| C | -2.1648719042 | -2.386877195  | 1.5671358277  |
| C | -0.1547872889 | -1.8718696692 | 3.0259390979  |
| H | -0.7329938062 | -0.7059445892 | -2.6840813431 |
| H | -0.1516666305 | 0.9481798118  | -2.5593148431 |
| C | -2.1080389118 | 0.6842523181  | -1.8151079364 |
| H | -2.8394694841 | -2.029205062  | 2.3529266661  |
| H | -2.6421243618 | -2.203863174  | 0.6003533134  |
| H | -2.0404269935 | -3.4686771367 | 1.6948789778  |
| H | -0.8177359839 | -1.5185586547 | 3.8219521053  |
| H | 0.0489441021  | -2.9343013247 | 3.2066737929  |
| H | 0.7896721087  | -1.3241570957 | 3.0956499444  |
| H | 0.3275324247  | -5.3979505525 | -3.0871428088 |
| H | -0.7735921602 | -4.0196457048 | -3.2731268159 |
| H | 0.8950289649  | -3.9024700833 | -3.8605588269 |
| H | 2.2623919382  | -5.2670746173 | -1.4174123635 |
| H | 2.8423646187  | -3.7456993228 | -2.1262874732 |
| H | 2.4677332354  | -3.8334721952 | -0.3958843633 |
| C | -2.7383071165 | 1.8442643432  | -2.1620111687 |
| C | -4.1085183613 | 1.7056165439  | -1.7569258581 |
| C | -4.2119347135 | 0.4729739812  | -1.1912138263 |
| O | -3.0050440791 | -0.1680410212 | -1.2242553825 |
| H | -5.0249699246 | -0.073430903  | -0.7367471263 |
| H | -4.9030675774 | 2.430174327   | -1.8685744783 |
| H | -2.2801089281 | 2.6932163641  | -2.6493155807 |
| C | 0.6877803909  | 0.6874516821  | -0.0648827292 |
| C | 1.757070174   | 0.4211843039  | 0.7327959302  |
| C | 0.1768487275  | 2.1170761008  | -0.183442112  |
| C | 2.4061694404  | 1.4461867081  | 1.5418953118  |
| O | -0.7160084735 | 2.3738707407  | 0.7750515252  |
| O | 0.5071910473  | 2.882812384   | -1.064302297  |
| C | -1.2381034635 | 3.7210518485  | 0.8063356837  |
| H | -1.9253675403 | 3.7463488799  | 1.6513465935  |
| H | -0.4239887083 | 4.4334647619  | 0.9552164653  |
| H | -1.7676210669 | 3.9491487057  | -0.1207763503 |
| O | 3.4236001139  | 0.9078032393  | 2.2610650558  |
| O | 2.1204415763  | 2.6364866867  | 1.5960596123  |
| C | 4.1570281656  | 1.8270309947  | 3.0882577681  |
| H | 4.9264216435  | 1.2313611006  | 3.5803955632  |
| H | 4.6196799413  | 2.6121800024  | 2.4842101858  |
| H | 3.5041339801  | 2.2869387534  | 3.8349468227  |

## 12c\_t2

|   |               |               |               |
|---|---------------|---------------|---------------|
| C | -0.0769897144 | -0.7800839145 | -0.6500513549 |
| N | 1.1960486156  | -0.1802056975 | -0.6824465356 |
| C | 2.204389509   | -0.652161361  | -1.6755935176 |
| N | -0.2789362244 | -1.879924007  | -1.2851142293 |

|   |               |               |               |
|---|---------------|---------------|---------------|
| C | -1.6271250286 | -2.3763615702 | -1.5568885512 |
| N | -1.0231953851 | -0.0109053376 | 0.037861034   |
| C | -1.7872925326 | -0.5320282774 | 1.1788819245  |
| C | -3.1123362969 | 0.1387006628  | 1.3242238349  |
| H | -1.9219293118 | -1.6069974442 | 1.0438853706  |
| H | -1.2439594464 | -0.393440536  | 2.1231139953  |
| O | -4.0488401613 | -0.0845844459 | 0.3471239543  |
| C | -5.1687454375 | 0.6185445229  | 0.6904130799  |
| C | -4.9714974829 | 1.2814488851  | 1.8619025218  |
| C | -3.6316191035 | 0.9701019121  | 2.2733953429  |
| H | -3.1194795651 | 1.3186702888  | 3.1597460086  |
| H | -5.685951396  | 1.9139629243  | 2.3702305147  |
| H | -6.0025430828 | 0.5435720057  | 0.0081462925  |
| C | 3.1991139537  | -1.6618645129 | -1.0897858004 |
| H | 1.5982478494  | -1.1736455334 | -2.4179281931 |
| C | 2.9189469621  | 0.5138207308  | -2.3630927119 |
| C | -1.8006607034 | -2.5015409906 | -3.0782707559 |
| C | -1.8210986948 | -3.7419877306 | -0.8818438632 |
| H | -2.4009154603 | -1.6887818299 | -1.188710174  |
| H | -2.8169151648 | -4.1463131738 | -1.0953874072 |
| H | -1.0755161008 | -4.4571571258 | -1.2488258832 |
| H | -1.7080165145 | -3.6733926399 | 0.2054607541  |
| H | 3.8460154267  | -2.043327658  | -1.8872135702 |
| H | 3.8472138647  | -1.2048632064 | -0.3329403827 |
| H | 2.6785147687  | -2.5087979835 | -0.6364949588 |
| H | 3.5691083514  | 0.1227475963  | -3.15295181   |
| H | 2.202117913   | 1.1994023304  | -2.8239465999 |
| H | 3.5508047517  | 1.0797958271  | -1.6704799659 |
| H | -0.7427451689 | 0.956665706   | 0.1528037788  |
| H | -2.7917279153 | -2.8974019428 | -3.3283431469 |
| H | -1.6914187972 | -1.5265551946 | -3.5654525584 |
| H | -1.0450803008 | -3.1759813285 | -3.4980461981 |
| C | 1.6658846202  | 0.5203907278  | 0.4646340291  |
| C | 1.8706850293  | 1.8487194868  | 0.5056817744  |
| C | 2.0266963105  | -0.2395920259 | 1.7249749727  |
| C | 1.4235385379  | 2.8131076981  | -0.5322489316 |
| O | 1.566924206   | -1.4971911692 | 1.705212707   |
| O | 2.6370226852  | 0.2449213748  | 2.6604327422  |
| C | 1.8428524654  | -2.288014406  | 2.8822043439  |
| H | 1.3935662996  | -3.2615055139 | 2.6898741975  |
| H | 2.9206769832  | -2.3874774396 | 3.0286526087  |
| H | 1.3938486743  | -1.8278711943 | 3.7652259257  |
| O | 2.3134503705  | 3.8069040546  | -0.6727567273 |
| O | 0.3644186626  | 2.7535468297  | -1.131710235  |
| C | 1.9634490597  | 4.8427387212  | -1.6180934446 |
| H | 2.7909206634  | 5.5509148125  | -1.5931653917 |
| H | 1.8517832156  | 4.4240805899  | -2.6208561806 |
| H | 1.0335968668  | 5.3323312021  | -1.3195880042 |
| H | 2.3534383738  | 2.269341301   | 1.3821473752  |

# E-12c\_t2

|   |               |               |               |
|---|---------------|---------------|---------------|
| C | -0.6020822314 | -0.6739952843 | -0.056456987  |
| N | 0.7952607986  | -0.6917573935 | -0.4822581715 |
| C | 1.0406753601  | -1.5984613757 | -1.6527582515 |
| N | -0.8256141643 | -1.7132183545 | 0.8009067946  |
| C | -2.0761536264 | -2.3167315404 | 1.2889928269  |
| N | -1.3299449766 | 0.2516541     | -0.5620720196 |
| C | -2.7216496707 | 0.5073403747  | -0.1902945123 |
| C | -3.6845272813 | 0.1136575381  | -1.2658928903 |
| H | -3.0219763599 | 0.0579153625  | 0.7633716693  |
| H | -2.8293558329 | 1.5913842673  | -0.0680969735 |
| O | -3.8190171304 | -1.2258455756 | -1.5343318005 |
| C | -4.7439952785 | -1.3511189046 | -2.5341215794 |
| C | -5.2013690384 | -0.126304727  | -2.9082065219 |
| C | -4.5101036912 | 0.8264889871  | -2.0852318907 |
| H | -4.6136042053 | 1.9027260397  | -2.0995962242 |
| H | -5.9359076675 | 0.0776511514  | -3.6750254776 |
| H | -4.9567004407 | -2.358958028  | -2.8584163978 |
| C | 2.3040202729  | -2.4595173705 | -1.5383825776 |
| H | 0.1974959029  | -2.2913787704 | -1.5994004135 |
| C | 0.9478777551  | -0.846643524  | -2.986221408  |
| H | 0.0184702612  | -2.1855336561 | 1.1005556216  |
| C | -1.9386925632 | -3.8411107339 | 1.2097596434  |
| C | -2.3998315371 | -1.8565233743 | 2.7155929778  |
| H | -2.8765242909 | -2.0152291274 | 0.6122156397  |
| H | -3.3392122438 | -2.3036689204 | 3.0577732688  |
| H | -1.6053117379 | -2.1619610909 | 3.4061195393  |
| H | -2.4978982448 | -0.7680702576 | 2.7735261585  |
| H | 2.2232294157  | -3.275039499  | -2.2641322965 |
| H | 3.2190706619  | -1.9130593734 | -1.7746664272 |
| H | 2.3981154188  | -2.9005624201 | -0.5422556909 |
| H | 0.9922595155  | -1.5622402237 | -3.8142244626 |
| H | 0.0028220576  | -0.3011134534 | -3.053654678  |
| H | 1.7708014989  | -0.136456339  | -3.0968742693 |
| H | 0.2609832046  | 1.2959528625  | 1.2652959146  |
| H | -2.8536201489 | -4.3230149941 | 1.567855405   |
| H | -1.75700533   | -4.1666700917 | 0.1808184162  |
| H | -1.1075999368 | -4.190024986  | 1.834616297   |
| C | 1.6349274782  | 0.2773943603  | -0.0052457739 |
| C | 1.2802248422  | 1.2305377062  | 0.9116441395  |
| C | 3.0724248552  | 0.2668461539  | -0.5073275955 |
| C | 2.2160296449  | 2.2098136678  | 1.4326446191  |
| O | 3.8619801494  | -0.4016450664 | 0.3370013224  |
| O | 3.4302845055  | 0.7719447804  | -1.5506491885 |
| C | 5.2697368909  | -0.3974565048 | 0.0145753166  |
| H | 5.7514207732  | -0.9708278867 | 0.8060383728  |
| H | 5.4468088631  | -0.8676201463 | -0.9555763067 |
| H | 5.6455580417  | 0.6276594415  | 0.0029125705  |
| O | 1.6079833519  | 3.0073712814  | 2.3539502344  |
| O | 3.3943520479  | 2.3584039963  | 1.1220336847  |

|   |              |              |              |
|---|--------------|--------------|--------------|
| C | 2.4332393171 | 4.0313593035 | 2.9300568166 |
| H | 1.7921596974 | 4.5684689312 | 3.6302116937 |
| H | 3.2850143844 | 3.5974278936 | 3.4613124304 |
| H | 2.803751662  | 4.7162207946 | 2.1621254127 |

**TS4<sub>sc</sub>(1c\_t1)**

|   |               |               |               |
|---|---------------|---------------|---------------|
| C | -1.3018402781 | 0.6308783501  | -0.2796831367 |
| N | -1.6365530543 | 1.8960511081  | -0.6307259737 |
| N | -0.0015996548 | 0.1314085556  | -0.4261322678 |
| N | -2.1424780234 | -0.281195645  | 0.1376380674  |
| C | -3.5627696478 | -0.041100521  | 0.4414093772  |
| H | -2.6390537681 | 2.0160730524  | -0.7270621171 |
| C | -0.9743329201 | 3.1815435365  | -0.2713458349 |
| C | 1.0913509118  | 0.890293354   | -1.035855714  |
| C | -3.982674513  | -0.7098233023 | 1.7555324452  |
| C | -4.4612137596 | -0.4588126605 | -0.7308403465 |
| H | -3.6768958971 | 1.0397380182  | 0.586941191   |
| H | 0.0480279316  | 2.95954232    | 0.0307296239  |
| C | -0.9647931078 | 4.0974173389  | -1.4953235703 |
| C | -1.6982958289 | 3.8226637011  | 0.9172157523  |
| H | 1.6574735208  | 0.2049718467  | -1.6678200013 |
| H | 0.6627575545  | 1.6596181892  | -1.6818878863 |
| C | 2.0174981616  | 1.4915178343  | -0.0198130379 |
| H | -0.4837205999 | 5.049066495   | -1.2494145127 |
| H | -0.4232842025 | 3.6419058741  | -2.3299271616 |
| H | -1.9877625252 | 4.310714269   | -1.8267111374 |
| H | -1.2163184265 | 4.770047714   | 1.1796392912  |
| H | -2.7451110025 | 4.033216068   | 0.6690100409  |
| H | -1.6740121561 | 3.1726995634  | 1.7970828092  |
| H | -5.5007327785 | -0.196342916  | -0.5082948927 |
| H | -4.1717184872 | 0.0535639092  | -1.6538501022 |
| H | -4.4069221098 | -1.5360253863 | -0.9056224124 |
| H | -5.0188229782 | -0.4301525405 | 1.9726228286  |
| H | -3.9076203722 | -1.7958204816 | 1.6965894067  |
| H | -3.3535251567 | -0.3741172732 | 2.5844698877  |
| C | 2.1180009798  | 1.4396944968  | 1.3394949588  |
| C | 3.2747693263  | 2.2191548261  | 1.6879514843  |
| C | 3.7876745903  | 2.684592998   | 0.5187110499  |
| O | 3.0297881242  | 2.2499740243  | -0.5360261257 |
| H | 4.6344333194  | 3.305364962   | 0.2670301546  |
| H | 3.6643202242  | 2.4030013567  | 2.6795788551  |
| H | 1.4603212588  | 0.9084803719  | 2.0124057745  |
| C | 0.0601042217  | -1.2065268998 | -0.0823194434 |
| C | 1.0799220664  | -2.0940943726 | 0.0158681992  |
| C | -1.3672078366 | -1.7473046578 | 0.2594696386  |
| C | 2.5087859494  | -2.0316748197 | -0.2877488953 |
| O | -1.8082073898 | -2.4040673696 | -0.962121702  |
| O | -1.5270336429 | -2.3486121979 | 1.3480824024  |
| C | -2.4469220251 | -3.657671873  | -0.7649595899 |
| H | -2.5175770839 | -4.1199316831 | -1.7545014319 |



|   |               |               |               |
|---|---------------|---------------|---------------|
| H | -1.8760399972 | -4.3128502802 | -0.0990528781 |
| H | -3.461660665  | -3.5603390155 | -0.3553481385 |
| O | 3.1373003214  | -3.0786812489 | 0.3113267782  |
| O | 3.1212908643  | -1.2366212895 | -0.9900472848 |
| C | 4.5474311674  | -3.1882310604 | 0.0578466581  |
| H | 4.8742598778  | -4.0799522676 | 0.5938288397  |
| H | 4.7454845233  | -3.2996086857 | -1.0117227462 |
| H | 5.0815967512  | -2.3101664179 | 0.4308438067  |
| H | 0.7607662424  | -3.0492172676 | 0.42058602    |

#### TS4<sub>sc</sub>(1c\_t2)

|   |               |               |               |
|---|---------------|---------------|---------------|
| C | -0.5528061129 | 0.7604966712  | 0.1765829238  |
| N | -0.8408097569 | -0.3691016437 | 0.7862738013  |
| N | -1.3733972738 | 1.7283196314  | -0.242594234  |
| N | 0.8261803348  | 0.8821493008  | -0.0539805734 |
| C | 1.5445082713  | 2.1805912458  | -0.2636458555 |
| C | 0.501907908   | -1.1616410139 | 1.1586078358  |
| C | 1.4692324864  | -0.2936213268 | 0.3125822249  |
| C | -2.8072896951 | 1.9423501168  | 0.0602921835  |
| C | 2.7101372689  | -0.773416673  | 0.0598506587  |
| C | -2.0943026351 | -1.0762959675 | 1.0110075487  |
| C | -2.6584481214 | -1.7202256185 | -0.2211636554 |
| H | -1.8304700958 | -1.8585683947 | 1.7289151692  |
| H | -2.8464432759 | -0.4384995134 | 1.4785852918  |
| H | 2.9028089879  | -1.7376465864 | 0.518499577   |
| C | 3.7679243043  | -0.2899040213 | -0.8210499597 |
| O | 0.4358116121  | -2.4055274076 | 0.958314037   |
| O | 4.8580420386  | -1.0953577523 | -0.7132135305 |
| O | 3.7421948559  | 0.6594072378  | -1.5964532761 |
| C | 5.9638569453  | -0.7663636168 | -1.5698247491 |
| H | 6.7360606942  | -1.5045431169 | -1.3507111705 |
| H | 5.6751204422  | -0.8275064183 | -2.6226961783 |
| H | 6.3360918371  | 0.2398560097  | -1.3588893592 |
| O | -3.9520605706 | -1.4065581455 | -0.5526027387 |
| C | -4.2617675564 | -2.1128124945 | -1.6821725274 |
| C | -3.1960588145 | -2.8630889575 | -2.0747754544 |
| C | -2.1531292554 | -2.6103620267 | -1.1225214841 |
| H | -1.1533725908 | -3.0185892981 | -1.0902654716 |
| H | -3.1570775887 | -3.5192419464 | -2.933406465  |
| H | -5.2611116422 | -1.9742654009 | -2.0670536036 |
| C | -3.3644165554 | 2.8872494981  | -1.0047521725 |
| H | -3.3219404535 | 0.9854720742  | -0.0374453368 |
| C | -3.0037955523 | 2.4905114363  | 1.4767184299  |
| H | 2.5894800817  | 1.8921351728  | -0.2082142425 |
| C | 1.3441429694  | 2.7753690969  | -1.6619203529 |
| C | 1.2744482     | 3.170585116   | 0.8753875225  |
| H | -4.0728562913 | 2.6041853209  | 1.6837090752  |
| H | -2.581749962  | 1.817199318   | 2.2288435203  |
| H | -2.5266312722 | 3.4705432786  | 1.583361951   |
| H | -4.4305682939 | 3.0530215664  | -0.828379574  |

|   |               |               |               |
|---|---------------|---------------|---------------|
| H | -2.8598395605 | 3.8598672027  | -0.9677330626 |
| H | -3.2419400855 | 2.4679328269  | -2.0080208332 |
| H | 1.9534666825  | 4.0221980012  | 0.7666670692  |
| H | 0.2527541623  | 3.5592179255  | 0.8731172381  |
| H | 1.46698416    | 2.703980169   | 1.8461813038  |
| H | 2.094997311   | 3.5565670356  | -1.8167157165 |
| H | 1.4874906228  | 2.0111530164  | -2.4283284591 |
| H | 0.3674294384  | 3.2486915809  | -1.811353571  |
| O | 0.7343937853  | -0.6992978121 | 2.5435124411  |
| C | 0.8988854139  | -1.7158656364 | 3.5186272738  |
| H | 1.8125275842  | -1.5197980647 | 4.0952850146  |
| H | 0.0489413957  | -1.7269491104 | 4.2169378283  |
| H | 0.9720505089  | -2.69843383   | 3.0432661088  |
| H | -0.9387012909 | 2.4794419441  | -0.7602244208 |

### 13c\_t1

|   |               |               |               |
|---|---------------|---------------|---------------|
| C | -0.8662092743 | -1.4382509723 | -0.2922970674 |
| N | -0.320061543  | -0.1604876602 | -0.41572658   |
| N | -2.1114654366 | -1.7616756511 | -0.6814974818 |
| N | 0.0083248182  | -2.2970742179 | 0.1954181245  |
| C | -0.2619387082 | -3.6624702587 | 0.6858914888  |
| C | 0.9799233974  | -0.15108058   | 0.0784268802  |
| C | 1.4149166616  | -1.626234473  | 0.333590325   |
| C | -3.3934578882 | -1.0171544671 | -0.5563816559 |
| O | 2.0955763308  | -1.9085431953 | 1.3575457985  |
| C | -0.9516990433 | 0.9358626685  | -1.1533316366 |
| C | -1.6446134402 | 1.9205778948  | -0.2581841077 |
| H | -0.1672480895 | 1.4528801222  | -1.7077787263 |
| H | -1.6458645412 | 0.5110822121  | -1.8826298692 |
| C | 1.8708948985  | 0.832750309   | 0.341976108   |
| O | -2.2620190607 | 2.9529637284  | -0.9051254109 |
| C | -2.808348621  | 3.762728642   | 0.0548099738  |
| C | -2.5513015331 | 3.2625052242  | 1.2919549019  |
| C | -1.7917143513 | 2.0584723867  | 1.0907895854  |
| H | -1.402634463  | 1.3958377208  | 1.8504155823  |
| H | -2.8605234713 | 3.6901404183  | 2.2355544002  |
| H | -3.3383556943 | 4.6312765099  | -0.3063308779 |
| C | -4.2235144206 | -1.6287666593 | 0.5766493585  |
| H | -3.1586998059 | 0.0120941092  | -0.2913880223 |
| C | -4.1340272417 | -1.0557469786 | -1.8935380129 |
| H | -1.2387240544 | -3.9649393346 | 0.2970375756  |
| C | -0.3376743849 | -3.6755245264 | 2.2196108834  |
| C | 0.7771123704  | -4.651559688  | 0.1491008386  |
| H | -5.0827046986 | -0.5165864919 | -1.8112861188 |
| H | -3.5431448475 | -0.5954480619 | -2.6910550697 |
| H | -4.3553333227 | -2.0893808243 | -2.1836362011 |
| H | -5.1747738728 | -1.0952066197 | 0.6693450243  |
| H | -4.4448026552 | -2.6830000812 | 0.373491774   |
| H | -3.6988579868 | -1.5620063272 | 1.5344025103  |
| H | 0.5159590067  | -5.6601012717 | 0.4854489518  |

|   |               |               |               |
|---|---------------|---------------|---------------|
| H | 0.8027109155  | -4.6442066403 | -0.9433984828 |
| H | 1.7720155064  | -4.4002412598 | 0.5211248261  |
| H | -0.5500641527 | -4.6912700398 | 2.5696705817  |
| H | 0.6100767853  | -3.3359493991 | 2.6404450879  |
| H | -1.1366432719 | -3.0192813859 | 2.579441946   |
| C | 1.8749987113  | 2.2714696789  | 0.0759003836  |
| H | 2.7466425011  | 0.4662222588  | 0.868751821   |
| O | 2.8054750087  | 2.8730267734  | 0.8626029662  |
| O | 1.213365956   | 2.9055052416  | -0.7359760699 |
| C | 2.9597372671  | 4.2897089583  | 0.6746869186  |
| H | 3.7471114176  | 4.5942223632  | 1.3649679087  |
| H | 3.2525320043  | 4.5180280635  | -0.3537060824 |
| H | 2.031517516   | 4.818207524   | 0.9082314619  |
| O | 1.9858214973  | -2.0321236394 | -0.9930583192 |
| C | 3.3865755923  | -1.8563232535 | -1.0859899149 |
| H | 3.729470936   | -2.4411662188 | -1.9465295938 |
| H | 3.6697175679  | -0.8047588224 | -1.2542422448 |
| H | 3.8957089698  | -2.2125632623 | -0.1834810452 |
| H | -2.2621787613 | -2.7635645461 | -0.7310573954 |

### 13c\_t2

|   |               |               |               |
|---|---------------|---------------|---------------|
| C | -0.2444553759 | -1.0107898668 | -0.2968741365 |
| N | -0.8331792204 | 0.1357727852  | -0.5771196539 |
| N | -0.7894387634 | -2.2208948628 | -0.1542867258 |
| N | 1.1339581743  | -0.8475203214 | -0.1135396026 |
| C | 2.1521129732  | -1.9342367948 | -0.2861038552 |
| C | 0.2392827868  | 1.2825292089  | -0.7280863929 |
| C | 1.4458677964  | 0.5090881531  | -0.1396983399 |
| C | -2.144912442  | -2.6903256645 | -0.5257180601 |
| C | 2.5426800285  | 1.2034699541  | 0.2468425466  |
| C | -2.2290516777 | 0.5586148717  | -0.5804852531 |
| C | -2.8313755203 | 0.6822901682  | 0.7871541921  |
| H | -2.1928980066 | 1.5500843817  | -1.0406917428 |
| H | -2.8481338559 | -0.0810765485 | -1.2115498609 |
| H | 2.4480001735  | 2.2742994054  | 0.1034233559  |
| C | 3.7548830599  | 0.7803183455  | 0.9423587004  |
| O | -0.0930436052 | 2.4001779148  | -0.2433700077 |
| O | 4.5902288709  | 1.8420539436  | 1.0919954851  |
| O | 4.0336232124  | -0.3272722121 | 1.3872945132  |
| C | 5.8079467479  | 1.5818910288  | 1.8094455428  |
| H | 6.3457598283  | 2.5302975218  | 1.8305195054  |
| H | 5.5974922909  | 1.24776475    | 2.8290868996  |
| H | 6.4068537089  | 0.8219980604  | 1.3001953894  |
| O | -3.9586209894 | -0.0552046315 | 1.0471869023  |
| C | -4.3358391346 | 0.2234749995  | 2.3317599567  |
| C | -3.4741916118 | 1.1159878978  | 2.8921462906  |
| C | -2.4968929907 | 1.4175424604  | 1.8862107643  |
| H | -1.6475825356 | 2.0826844694  | 1.9467499111  |
| H | -3.5294111209 | 1.5152957798  | 3.8955448555  |
| H | -5.2224550323 | -0.2822555502 | 2.6840671083  |

|   |               |               |               |
|---|---------------|---------------|---------------|
| C | -2.3979463032 | -3.9989641964 | 0.2229781474  |
| H | -2.8682476339 | -1.9549161671 | -0.1707520689 |
| C | -2.2817872289 | -2.8558234889 | -2.0419593677 |
| H | 3.0916045361  | -1.3903604409 | -0.2702775602 |
| C | 2.2086349549  | -2.9135513078 | 0.8911023241  |
| C | 2.0317678314  | -2.6188475019 | -1.6526305922 |
| H | -3.3026187692 | -3.1654715648 | -2.2881286909 |
| H | -2.0752029387 | -1.9184106453 | -2.5671664137 |
| H | -1.5910760394 | -3.6201535551 | -2.4135919216 |
| H | -3.401240223  | -4.3665932269 | -0.0081074051 |
| H | -1.6772724544 | -4.7681593684 | -0.0783476001 |
| H | -2.3240881676 | -3.8556300054 | 1.3053068862  |
| H | 2.9067178273  | -3.2598613816 | -1.7998892959 |
| H | 1.1421621422  | -3.2479924314 | -1.7406211163 |
| H | 2.0146674341  | -1.8767609081 | -2.4564811814 |
| H | 3.1316351374  | -3.4967320375 | 0.813137818   |
| H | 2.227612909   | -2.3741573307 | 1.8401999541  |
| H | 1.3851450179  | -3.6361709181 | 0.9093835087  |
| O | 0.424538498   | 1.2232448576  | -2.2041735181 |
| C | 1.0809844408  | 2.3601035912  | -2.7374523688 |
| H | 0.9357066883  | 2.3357050823  | -3.8226969634 |
| H | 0.6594269223  | 3.2890834804  | -2.3382782112 |
| H | 2.1642478177  | 2.352822992   | -2.5374045397 |
| H | -0.163365168  | -2.9480281751 | 0.162739889   |

#### 15c\_t1

|   |               |               |               |
|---|---------------|---------------|---------------|
| C | -1.2759897955 | 0.700695065   | -0.1468875232 |
| N | 0.0170172809  | 0.1447097166  | -0.4156629393 |
| N | -1.7282609268 | 1.888202442   | -0.2003186492 |
| N | -2.0780028816 | -0.3651463839 | 0.246468569   |
| C | -3.4599441711 | -0.1695255048 | 0.7250273483  |
| C | 0.0481743547  | -1.2010048708 | -0.1377549358 |
| C | -1.4131625516 | -1.6253000197 | 0.0804345614  |
| C | -1.0624550825 | 3.1548336606  | -0.4833154819 |
| O | -1.4973157463 | -2.4881688292 | 1.1753732136  |
| C | 1.1461398655  | 0.9179548016  | -0.9222663112 |
| C | 1.9369635997  | 1.586724855   | 0.1632438869  |
| H | 1.796019938   | 0.2298368701  | -1.4643367726 |
| H | 0.7778723421  | 1.6546638024  | -1.6380344928 |
| C | 1.0311347279  | -2.1364012512 | -0.0390087758 |
| O | 2.8303193836  | 2.529006751   | -0.2672500752 |
| C | 3.4892359481  | 2.9974219743  | 0.8383923468  |
| C | 3.0313435338  | 2.3738705003  | 1.95574538    |
| C | 2.0187315404  | 1.4521213636  | 1.5178863295  |
| H | 1.4384160803  | 0.7789102573  | 2.1324480366  |
| H | 3.3652524396  | 2.544833565   | 2.9697762462  |
| H | 4.2329027171  | 3.7587948009  | 0.6567867659  |
| C | -1.6017692571 | 4.1969080907  | 0.5064184349  |
| H | 0.0220907951  | 3.1108438677  | -0.3408478788 |
| C | -1.349503234  | 3.5809526347  | -1.9304616567 |

|   |               |               |               |
|---|---------------|---------------|---------------|
| H | -3.68346909   | 0.8593361539  | 0.4358019203  |
| C | -3.5520661983 | -0.2577759381 | 2.2563191024  |
| C | -4.4810746518 | -1.0819078504 | 0.0358931069  |
| H | -0.9142651114 | 4.5649838567  | -2.1360085041 |
| H | -0.9327280185 | 2.8667695338  | -2.6486214528 |
| H | -2.4303375786 | 3.6395969817  | -2.1025281758 |
| H | -1.1396866072 | 5.1743210847  | 0.329406395   |
| H | -2.6876663119 | 4.3025453932  | 0.4020457512  |
| H | -1.3870058559 | 3.8992147817  | 1.5381203772  |
| H | -5.4864858139 | -0.7779974539 | 0.3457414257  |
| H | -4.4148676863 | -1.0047225753 | -1.0517763717 |
| H | -4.359641115  | -2.1349153256 | 0.310012778   |
| H | -4.559736803  | 0.0214529252  | 2.582773729   |
| H | -3.3466144258 | -1.2683356477 | 2.6206771949  |
| H | -2.8416212197 | 0.426124025   | 2.7308080947  |
| C | 2.4743993593  | -2.0907618867 | -0.2717404522 |
| H | 0.6846163171  | -3.0977174563 | 0.3187340472  |
| O | 3.0439970016  | -3.1972720889 | 0.2743377673  |
| O | 3.1417597673  | -1.2583662171 | -0.8737549255 |
| C | 4.4645728282  | -3.3226709321 | 0.0937766841  |
| H | 4.7396569051  | -4.2624923518 | 0.5734303596  |
| H | 4.7222863556  | -3.3532977643 | -0.9682735431 |
| H | 4.9933584277  | -2.4912276018 | 0.5673931208  |
| O | -1.9621193271 | -2.2269032423 | -1.0891500207 |
| C | -1.4867656211 | -3.5190479196 | -1.4814224697 |
| H | -2.1655691596 | -3.8542597427 | -2.2688797108 |
| H | -0.4690498063 | -3.4742652058 | -1.8837270219 |
| H | -1.5168860556 | -4.2380175754 | -0.6563456247 |
| H | -2.3793184052 | -2.8965051194 | 1.1626697923  |

#### E-15c\_t1

|   |               |               |               |
|---|---------------|---------------|---------------|
| C | -1.2447742231 | -1.143954601  | -0.1026871609 |
| N | -0.5313270979 | 0.0462643294  | -0.4570991525 |
| N | -2.4874296361 | -1.4179289063 | -0.0751980999 |
| N | -0.2788357953 | -2.0562352979 | 0.2932632834  |
| C | -0.6221986928 | -3.378605979  | 0.8505680512  |
| C | 0.813201721   | -0.0838892711 | -0.2038899831 |
| C | 1.0537882312  | -1.5883285244 | 0.0339002771  |
| C | -3.6288415665 | -0.5342801728 | -0.2924996536 |
| O | 1.9115649337  | -1.9073668636 | 1.0607521298  |
| C | -1.0927182916 | 1.209052652   | -1.1345389117 |
| C | -1.4797056027 | 2.3217979918  | -0.2038846709 |
| H | -0.3462258121 | 1.5668702611  | -1.8532920417 |
| H | -1.9500939682 | 0.8884459256  | -1.7287368211 |
| C | 1.7051977025  | 0.9462942365  | -0.2497475293 |
| O | -2.0324363785 | 3.4158549551  | -0.8105031601 |
| C | -2.3079579368 | 4.3269496119  | 0.1739465821  |
| C | -1.9416657178 | 3.8334753235  | 1.3859965809  |
| C | -1.4002090869 | 2.5242344528  | 1.142281186   |
| H | -1.003023333  | 1.8347373196  | 1.8732220495  |

|   |               |               |               |
|---|---------------|---------------|---------------|
| H | -2.041138205  | 4.331986453   | 2.3401151349  |
| H | -2.7549519181 | 5.2537807225  | -0.153137791  |
| C | -4.6481023428 | -0.8046048999 | 0.8234766113  |
| H | -3.3621056705 | 0.5269782864  | -0.2302575595 |
| C | -4.2485769602 | -0.8096601081 | -1.6698744941 |
| H | -1.6663060144 | -3.5192473923 | 0.5616470857  |
| C | -0.5495796237 | -3.3796596329 | 2.3845879558  |
| C | 0.2002982233  | -4.5161335784 | 0.2369692483  |
| H | -5.1450242998 | -0.1982188767 | -1.8196274654 |
| H | -3.5450915725 | -0.5877381427 | -2.4794361159 |
| H | -4.5337079705 | -1.8646509013 | -1.7533288937 |
| H | -5.5334149342 | -0.1709412564 | 0.7010629821  |
| H | -4.9671646223 | -1.8529755778 | 0.8081716459  |
| H | -4.2121990539 | -0.5967016209 | 1.8062653206  |
| H | -0.1676351312 | -5.4691737292 | 0.6316450512  |
| H | 0.1062628529  | -4.5331237676 | -0.8515356724 |
| H | 1.2604029923  | -4.4302286212 | 0.4883465161  |
| H | -0.9119496455 | -4.3374082069 | 2.7745398639  |
| H | 0.475906001   | -3.2290293048 | 2.7309884746  |
| H | -1.1766507936 | -2.5871510737 | 2.8055469819  |
| C | 3.1034776541  | 0.8859321924  | 0.132847311   |
| H | 1.3495350999  | 1.9350360491  | -0.5133726762 |
| O | 3.7223758953  | 2.0542843047  | -0.1110629822 |
| O | 3.710045863   | -0.0630035391 | 0.6508849595  |
| C | 5.1084404211  | 2.139980153   | 0.2760674197  |
| H | 5.4212232175  | 3.1494392634  | 0.0096199084  |
| H | 5.2201124582  | 1.9807202024  | 1.3512353188  |
| H | 5.7071216235  | 1.4036024364  | -0.2652531037 |
| O | 1.4405150192  | -2.1738289675 | -1.2213419599 |
| C | 2.7876278779  | -2.0166148583 | -1.6608665352 |
| H | 2.8908950781  | -2.6615822345 | -2.5370402365 |
| H | 3.0066983505  | -0.9846905459 | -1.9622042409 |
| H | 3.5081754843  | -2.333592857  | -0.9008663424 |
| H | 2.6864311966  | -1.2871858132 | 1.0045493244  |

# 15c\_t2

|   |               |               |               |
|---|---------------|---------------|---------------|
| C | -0.5409527215 | 0.8739615281  | 0.1957026329  |
| N | -0.8340560801 | -0.4443759047 | 0.5505701288  |
| N | -1.2568848326 | 1.8896447939  | -0.0787359678 |
| N | 0.8813859548  | 0.9621888196  | 0.1187308665  |
| C | 1.6109313662  | 2.2427314876  | -0.0824622266 |
| C | 0.3777314188  | -1.1727993624 | 0.8712230006  |
| C | 1.4665690639  | -0.2608193747 | 0.2957931489  |
| C | -2.7158424507 | 1.9314217541  | -0.1702385209 |
| C | 2.7138874379  | -0.7718581835 | 0.0845638554  |
| C | -2.0999295486 | -0.9303078305 | 1.0892391943  |
| C | -2.9349127249 | -1.6346106508 | 0.0594329648  |
| H | -1.8643099774 | -1.6133659755 | 1.9134579621  |
| H | -2.6644648367 | -0.113546551  | 1.5438905982  |
| H | 2.8236614733  | -1.8105469876 | 0.367477334   |

|   |               |               |               |
|---|---------------|---------------|---------------|
| C | 3.8947276559  | -0.2208544298 | -0.5700319142 |
| O | 0.4540758845  | -2.4324694671 | 0.2810283316  |
| O | 4.9142297574  | -1.1193462186 | -0.4802113238 |
| O | 4.0306583629  | 0.843761739   | -1.1624718463 |
| C | 6.1385758369  | -0.7399006338 | -1.1283821134 |
| H | 6.8325403083  | -1.5623577979 | -0.9510903698 |
| H | 5.9874171944  | -0.6027783447 | -2.2026946862 |
| H | 6.5371582685  | 0.1850389966  | -0.7028490788 |
| O | -4.2175494306 | -1.9245531364 | 0.4374222229  |
| C | -4.8027540222 | -2.5970842906 | -0.6023243808 |
| C | -3.9200886    | -2.7378201687 | -1.6263337901 |
| C | -2.6996423159 | -2.1114913323 | -1.1964285873 |
| H | -1.7716687127 | -2.0325280293 | -1.7433079178 |
| H | -4.1077992126 | -3.2230245881 | -2.574146401  |
| H | -5.8307131225 | -2.8925099408 | -0.4542921596 |
| C | -3.0828583529 | 2.6877019074  | -1.4547209737 |
| H | -3.161467934  | 0.9330068254  | -0.2483122158 |
| C | -3.3007260921 | 2.6387138003  | 1.0602857608  |
| H | 2.6565786492  | 1.9605074575  | 0.0034334673  |
| C | 1.418032394   | 2.8160675659  | -1.4890761178 |
| C | 1.3069413357  | 3.2514372433  | 1.0313282255  |
| H | -4.3899660613 | 2.719055446   | 0.9759046916  |
| H | -3.0690079672 | 2.0975780753  | 1.983669256   |
| H | -2.8887113796 | 3.6503018995  | 1.1508101495  |
| H | -4.1708092281 | 2.7470370207  | -1.5693338959 |
| H | -2.6821596467 | 3.7074936607  | -1.430986757  |
| H | -2.6743546845 | 2.1810636915  | -2.3352765253 |
| H | 1.998484735   | 4.0955345936  | 0.9375039773  |
| H | 0.2861671111  | 3.6313955464  | 0.9739727703  |
| H | 1.4599423435  | 2.8007591615  | 2.0176404327  |
| H | 2.0782877883  | 3.6808033499  | -1.6160668012 |
| H | 1.6899783827  | 2.0736258259  | -2.2444810631 |
| H | 0.3888923997  | 3.1372740279  | -1.6575355602 |
| O | 0.4187468415  | -1.2561955348 | 2.2868531068  |
| C | 1.4857880127  | -1.9989252438 | 2.8888615265  |
| H | 1.2274068523  | -2.078396617  | 3.9468428943  |
| H | 1.5736006615  | -3.003413066  | 2.4642067809  |
| H | 2.4440231558  | -1.477526927  | 2.7929053452  |
| H | -0.2100937114 | -3.00423463   | 0.7040465692  |

#### E-15c\_t2

|   |               |               |               |
|---|---------------|---------------|---------------|
| C | 0.7322756369  | 1.052762455   | -0.2196215598 |
| N | 0.5983493388  | -0.3232860048 | -0.3736484397 |
| N | 1.7299945623  | 1.8412484074  | -0.157265599  |
| N | -0.5900031351 | 1.5691435997  | -0.063207234  |
| C | -0.8900011476 | 2.9983829632  | 0.2123187722  |
| C | -0.7984109066 | -0.7221966586 | -0.4536155813 |
| C | -1.521249022  | 0.5749458047  | -0.0368257008 |
| C | 3.1414459756  | 1.4577467811  | -0.1590313002 |
| C | -2.8497288225 | 0.713706135   | 0.2626727357  |

|   |               |               |               |
|---|---------------|---------------|---------------|
| C | 1.5945439427  | -1.2113529875 | -0.9590401778 |
| C | 2.3635355362  | -1.9930286849 | 0.0660419912  |
| H | 1.0688534766  | -1.8949506576 | -1.633668599  |
| H | 2.2825690006  | -0.6466942736 | -1.5931330112 |
| H | -3.2509237753 | 1.6959167449  | 0.4742980929  |
| C | -3.814039824  | -0.3573674587 | 0.3588843023  |
| O | -1.0182206293 | -1.8049262729 | 0.3644250146  |
| O | -5.060977482  | 0.1271873184  | 0.5264479344  |
| O | -3.6119706081 | -1.5829882043 | 0.3293617785  |
| C | -6.1107058012 | -0.8459991851 | 0.6843538027  |
| H | -7.0248550612 | -0.267430014  | 0.8179662628  |
| H | -6.1913783367 | -1.4778283134 | -0.2036090306 |
| H | -5.9302134963 | -1.4734819527 | 1.560664336   |
| O | 3.4510841     | -2.6732888404 | -0.4122810405 |
| C | 4.0049129545  | -3.3450275394 | 0.6448652396  |
| C | 3.2948494145  | -3.1024108675 | 1.7783613288  |
| C | 2.2226181746  | -2.2218130744 | 1.4025573457  |
| H | 1.4438941916  | -1.8229615445 | 2.0352927611  |
| H | 3.5028701525  | -3.4971982944 | 2.7632736512  |
| H | 4.8835016013  | -3.9322291681 | 0.4229208134  |
| C | 3.8331975014  | 2.203999247   | 0.9905042379  |
| H | 3.2872410726  | 0.3864017975  | 0.0192516676  |
| C | 3.7793891311  | 1.8250401181  | -1.5059136855 |
| H | -1.9782954649 | 3.0511411909  | 0.2077033989  |
| C | -0.4133209301 | 3.4310973545  | 1.6027121054  |
| C | -0.4101864521 | 3.9214352765  | -0.91314369   |
| H | 4.8497566262  | 1.5920976346  | -1.5007964671 |
| H | 3.3148382674  | 1.277202081   | -2.3324460884 |
| H | 3.6622481555  | 2.8965663992  | -1.7045374507 |
| H | 4.9002685534  | 1.9577595634  | 1.0220470465  |
| H | 3.7325851156  | 3.2879751524  | 0.8639939815  |
| H | 3.3921755541  | 1.9301756041  | 1.9546254248  |
| H | -0.8220038825 | 4.921913784   | -0.7445699207 |
| H | 0.6770990652  | 3.9889608761  | -0.9452942158 |
| H | -0.7708910024 | 3.5680744855  | -1.8845789127 |
| H | -0.7842345035 | 4.4398424645  | 1.8116500174  |
| H | -0.8041019877 | 2.7604984835  | 2.3747097525  |
| H | 0.6762565733  | 3.4424297789  | 1.6655306728  |
| O | -1.1337110353 | -0.9621159637 | -1.8225205138 |
| C | -1.6370964943 | -2.2500369891 | -2.2005495213 |
| H | -1.696103168  | -2.2212430133 | -3.2913152741 |
| H | -0.9705074256 | -3.0643684552 | -1.9016997857 |
| H | -2.6357947173 | -2.4346738717 | -1.7944148726 |
| H | -2.0073285628 | -1.9038012112 | 0.4238402034  |

#### 16c\_t1

|   |               |               |               |
|---|---------------|---------------|---------------|
| C | -1.3107913802 | 0.468825768   | 0.1081258913  |
| N | 0.0611024817  | 0.7880197801  | 0.2943179345  |
| N | -2.2352417928 | 1.3314964508  | -0.1329181739 |
| N | -1.6373936874 | -0.8842202346 | 0.2545858987  |



C -3.0722774355 -1.2748963875 0.1906866167  
C 0.8699403918 -0.0839507531 1.0393654631  
C -0.5664638659 -1.8837464403 0.2417833483  
C -2.1058465573 2.7671666647 0.1045110687  
O -0.9720356575 -3.1054336767 0.793347646  
C 0.7372683206 1.7056418761 -0.6640473774  
H -0.0292213083 2.257430859 -1.1981646358  
H 1.3349430375 2.41771213 -0.0911992903  
C 1.5871725408 1.0189922483 -1.6818062015  
C 0.567667663 -1.3875688614 1.0985467823  
C -3.0917222695 3.160192279 1.2175561919  
H -1.1018990382 3.0505152361 0.4505850679  
C -2.425572736 3.5421288076 -1.1817856336  
H -3.5687237574 -0.3170262249 0.0429128793  
C -3.5986458659 -1.8562488677 1.5107075116  
C -3.4237136873 -2.1364796121 -1.0313021049  
H -2.3758696007 4.6226781318 -1.0087582813  
H -1.7303159376 3.296457751 -1.9917849799  
H -3.4362155455 3.2965826112 -1.5279374517  
H -3.046617842 4.2376761855 1.4137521748  
H -4.1184257399 2.9049576498 0.9310515646  
H -2.8594416468 2.6349295074 2.1499934226  
H -4.5139553688 -2.1866247624 -1.1258027463  
H -3.0216764668 -1.6989735688 -1.949029944  
H -3.0688263846 -3.1712412128 -0.9663036955  
H -4.6909382101 -1.9291664327 1.460925688  
H -3.1990889009 -2.8487772557 1.7263530378  
H -3.3443510749 -1.1972296609 2.3472994409  
H 1.0793301546 -2.0803610197 1.7524706763  
C 1.9767707007 0.5283750241 1.8404387527  
O 2.8386320823 -0.3980354311 2.2876875541  
O 2.0797605271 1.7196102267 2.0710847499  
C 3.9063981363 0.0904114792 3.1267808938  
H 4.4919433403 -0.7889967653 3.3932500234  
H 4.5241018977 0.8067566942 2.5802053786  
H 3.503732076 0.5648159534 4.0248867232  
O -0.2022390427 -2.056290194 -1.1243149437  
C 0.9282279246 -2.9017829645 -1.3659046716  
H 1.0185025366 -2.9836715718 -2.4507808888  
H 1.8516469604 -2.4707921981 -0.9634597035  
H 0.784988547 -3.9020603141 -0.941899635  
C 1.4193572445 0.7412641737 -3.0073968637  
C 2.6119577626 0.0737500821 -3.4440116659  
C 3.4209663513 -0.008031067 -2.352455968  
O 2.8168016215 0.5672674263 -1.2703599383  
H 4.4074264285 -0.4140439773 -2.1841785499  
H 2.8354265748 -0.2903666553 -4.4371904912  
H 0.5490252605 0.9848416423 -3.6009971615  
H -1.5177277625 -3.5608725284 0.132536616

**16c\_t2**

|   |               |               |               |
|---|---------------|---------------|---------------|
| C | -0.0251115719 | 0.9723359626  | 0.1099441485  |
| N | 0.6936743776  | -0.2538740929 | 0.1044819022  |
| N | 0.5026615191  | 2.1411497019  | 0.0850261643  |
| N | -1.4330550019 | 0.8716202289  | 0.1332241208  |
| C | -2.1977108485 | 2.0868111965  | 0.5578592145  |
| C | 0.0240980313  | -1.3577725802 | 0.8144443513  |
| C | -2.0366164461 | -0.3832316499 | -0.0270653098 |
| C | 1.9368376011  | 2.3548327501  | 0.2637153031  |
| C | -3.3493803599 | -0.4812929485 | -0.7469955879 |
| C | 1.4402146783  | -0.578993     | -1.1319044782 |
| C | 2.9147999828  | -0.7932953315 | -0.9419254412 |
| H | 0.9901418621  | -1.463831975  | -1.5958284942 |
| H | 1.3131365175  | 0.2440205688  | -1.8373969964 |
| C | -1.3762545927 | -1.5127653493 | 0.285288919   |
| O | 3.6966174315  | -0.338943092  | -1.9741526323 |
| C | 4.9947810421  | -0.6402824981 | -1.6682514835 |
| C | 5.0579635235  | -1.2696232554 | -0.4642665543 |
| C | 3.7052874572  | -1.374798136  | 0.0066560241  |
| H | 3.3605627751  | -1.8298617963 | 0.9225350256  |
| H | 5.953182961   | -1.6194463727 | 0.0313057086  |
| H | 5.7340999339  | -0.3413353115 | -2.396230659  |
| C | 2.1361938049  | 3.2758672679  | 1.4767608274  |
| H | 2.4653444249  | 1.4125462242  | 0.4609750541  |
| C | 2.5284124826  | 2.9923948914  | -1.0009888157 |
| H | -1.4864272981 | 2.6222775798  | 1.1905490935  |
| C | -3.41142252   | 1.7378063444  | 1.4240762755  |
| C | -2.5503582097 | 3.0163985463  | -0.608188781  |
| H | 3.5937103445  | 3.2076335259  | -0.8623669442 |
| H | 2.4271975316  | 2.3332244123  | -1.8683133991 |
| H | 2.0158571603  | 3.9341756046  | -1.2292574921 |
| H | 3.2005307119  | 3.4815859032  | 1.6368909766  |
| H | 1.6197909601  | 4.2309014413  | 1.3258152931  |
| H | 1.7376296873  | 2.815489758   | 2.387268075   |
| H | -2.9898989835 | 3.9403759167  | -0.2153786257 |
| H | -1.6493217848 | 3.2829520555  | -1.166438339  |
| H | -3.2638927826 | 2.5495668393  | -1.2889823236 |
| H | -3.7829444831 | 2.6586281265  | 1.8848072382  |
| H | -4.2399758212 | 1.3108484254  | 0.8521882735  |
| H | -3.1434730349 | 1.0454371323  | 2.2282079023  |
| H | -1.7862523433 | -2.4871607849 | 0.0598748654  |
| O | -0.0672946871 | -1.028339847  | 2.1779734134  |
| O | -4.0545026769 | -1.5468665863 | -0.3330048092 |
| O | -3.7173524146 | 0.271362936   | -1.629268571  |
| C | -5.2797054476 | -1.8059173216 | -1.0522297689 |
| H | -5.7038919166 | -2.6973247907 | -0.5911151749 |
| H | -5.9669417156 | -0.9627270141 | -0.9513694933 |
| H | -5.0740772323 | -1.9859999383 | -2.1100399159 |
| O | 0.8309587646  | -2.4853230405 | 0.5959300027  |
| C | 0.4376742169  | -3.6742670659 | 1.2881930859  |

|   |              |               |              |
|---|--------------|---------------|--------------|
| H | 1.2265257025 | -4.4041877524 | 1.0979558556 |
| H | 0.3545152221 | -3.4987471853 | 2.3645951394 |
| H | -0.511543413 | -4.0730533761 | 0.9120238796 |
| H | 0.8324308778 | -0.7849942473 | 2.4605109572 |

### 17c\_t1

|   |               |               |               |
|---|---------------|---------------|---------------|
| C | -0.4776797355 | -0.8282776364 | 0.5950110681  |
| N | 0.9208528486  | -0.6399376003 | 0.4454805033  |
| N | -1.2160889074 | -1.8348231748 | 0.7977239322  |
| N | -1.0542544083 | 0.46289647    | 0.4659019065  |
| C | -2.5125821195 | 0.7103854994  | 0.5515941523  |
| C | 1.2133362465  | 0.6880021843  | 0.1992551523  |
| C | -0.1120523703 | 1.404132805   | 0.2063853113  |
| C | -0.8769066575 | -3.254117479  | 0.8756172008  |
| O | -0.3108200517 | 2.6047709675  | 0.018745873   |
| C | 1.9090559174  | -1.693746691  | 0.6702958215  |
| C | 2.2224914131  | -2.4706134453 | -0.5735981098 |
| H | 2.8182376612  | -1.2142455976 | 1.0342902553  |
| H | 1.5476582855  | -2.3542393603 | 1.4604057489  |
| C | 2.3387232535  | 1.4130849964  | -0.0316536113 |
| O | 2.9682567108  | -3.5998454699 | -0.3769943675 |
| C | 3.1973598302  | -4.1524098887 | -1.6090432732 |
| C | 2.6115157285  | -3.3993582866 | -2.5767989581 |
| C | 1.9751161625  | -2.2999913167 | -1.9037124884 |
| H | 1.4151090321  | -1.493726619  | -2.3553433306 |
| H | 2.6241480503  | -3.5954433051 | -3.6399367361 |
| H | 3.7778081982  | -5.0627274427 | -1.616958482  |
| C | -1.9278695343 | -4.0235966783 | 0.0653728098  |
| H | 0.1015206781  | -3.4773697009 | 0.4395408699  |
| C | -0.8808311868 | -3.6970485256 | 2.3448792799  |
| H | -2.9292589371 | -0.2745913348 | 0.7669112532  |
| C | -3.0629699039 | 1.2004447648  | -0.7906933751 |
| C | -2.834633151  | 1.6519966967  | 1.7151991298  |
| H | -0.6967974995 | -4.7741164263 | 2.414966503   |
| H | -0.1074130367 | -3.1793253666 | 2.9214659593  |
| H | -1.8508187061 | -3.4812834229 | 2.8062766141  |
| H | -1.7207547317 | -5.0984385254 | 0.0982607487  |
| H | -2.9311630603 | -3.8497497206 | 0.4696745165  |
| H | -1.9209258565 | -3.7058918042 | -0.9822552041 |
| H | -3.920711979  | 1.7429018068  | 1.8152736409  |
| H | -2.4375121885 | 1.2591615671  | 2.6564337402  |
| H | -2.419792439  | 2.6492815939  | 1.5489287566  |
| H | -4.1515649976 | 1.2912787875  | -0.7229807727 |
| H | -2.6521994011 | 2.1773163202  | -1.0579764818 |
| H | -2.8297678323 | 0.4906922187  | -1.5905761081 |
| C | 3.7546738209  | 1.0400629935  | -0.1145880199 |
| H | 2.15022941    | 2.4648347575  | -0.2202849835 |
| O | 4.4572516241  | 2.0890084185  | -0.6033187125 |
| O | 4.2953053256  | -0.0118796579 | 0.1997626295  |
| C | 5.8769727657  | 1.8890495388  | -0.7291602137 |

|   |              |              |               |
|---|--------------|--------------|---------------|
| H | 6.2716670044 | 2.8295106397 | -1.1139005007 |
| H | 6.3239612363 | 1.6606791526 | 0.2417693459  |
| H | 6.0936653306 | 1.0758458968 | -1.4266960979 |
| H | 0.7469525035 | 4.067223851  | -0.3893890174 |
| O | 1.3776323127 | 4.8053212447 | -0.4741997097 |
| C | 1.4890475983 | 5.3954653689 | 0.8128690331  |
| H | 2.2333495701 | 6.1961085789 | 0.7511936296  |
| H | 0.5425907085 | 5.8410873865 | 1.1553229012  |
| H | 1.8249074642 | 4.6813959715 | 1.5794552673  |

#### **E-17c\_t1**

|   |               |               |               |
|---|---------------|---------------|---------------|
| C | -0.6369392915 | -0.5960663838 | 0.3770257556  |
| N | 0.7410374534  | -0.3670794237 | 0.1562753677  |
| N | -1.3086132475 | -1.5983052824 | 0.7643444887  |
| N | -1.2777085722 | 0.6188308867  | 0.0390875878  |
| C | -2.7428639394 | 0.8139043389  | 0.1169060505  |
| C | 0.9644608498  | 0.9220853819  | -0.3082820058 |
| C | -0.3964448754 | 1.5521076776  | -0.4376447427 |
| C | -0.8378798392 | -2.9599095288 | 1.0156739444  |
| O | -0.6854423861 | 2.6450692383  | -0.906125531  |
| C | 1.8263110114  | -1.1988380201 | 0.6654458668  |
| C | 2.444397867   | -2.0668783336 | -0.3906727502 |
| H | 2.5843856143  | -0.5316719197 | 1.0925543565  |
| H | 1.4536721023  | -1.8016750405 | 1.4950029238  |
| C | 2.1831366381  | 1.4315096079  | -0.6133413873 |
| O | 3.5222206189  | -2.8011064997 | 0.0192103916  |
| C | 3.9532904301  | -3.5220891775 | -1.0624642155 |
| C | 3.1733401316  | -3.2582439592 | -2.1435544756 |
| C | 2.1866435085  | -2.3077901454 | -1.7077230874 |
| H | 1.3983005131  | -1.8651532881 | -2.2993744062 |
| H | 3.2799472559  | -3.6823325451 | -3.1322083576 |
| H | 4.8081075115  | -4.1597705741 | -0.8936085827 |
| C | -1.8232049123 | -3.9205060228 | 0.3367813447  |
| H | 0.1514816316  | -3.1471298234 | 0.5828336834  |
| C | -0.7812426619 | -3.2129920229 | 2.5284494461  |
| H | -3.1113468059 | -0.1301023276 | 0.5216773759  |
| C | -3.3531762666 | 1.0243046287  | -1.272103223  |
| C | -3.0720473259 | 1.9414508583  | 1.1014133424  |
| H | -0.4899795283 | -4.2491328221 | 2.7297037898  |
| H | -0.0595356188 | -2.5527420656 | 3.0207170493  |
| H | -1.7635249983 | -3.0362067918 | 2.9803825554  |
| H | -1.5173021998 | -4.9591552349 | 0.501221986   |
| H | -2.8326867565 | -3.7869928751 | 0.7410889718  |
| H | -1.8610012969 | -3.7418197676 | -0.742649572  |
| H | -4.1579727444 | 2.0616822074  | 1.1687440134  |
| H | -2.6944774336 | 1.7025850028  | 2.1009583844  |
| H | -2.6350922283 | 2.8924299295  | 0.7850405386  |
| H | -4.4437900035 | 1.0589524695  | -1.1850940585 |
| H | -3.0120005652 | 1.9598618465  | -1.7209494642 |
| H | -3.0922413036 | 0.1981771779  | -1.9412849387 |

|   |               |              |               |
|---|---------------|--------------|---------------|
| C | 2.5032986221  | 2.8241679284 | -0.9580179643 |
| H | 3.0386881284  | 0.7660126062 | -0.6053914009 |
| O | 3.6973882882  | 2.8578694011 | -1.5981118678 |
| O | 1.8750181779  | 3.8376598493 | -0.6960197228 |
| C | 4.1824274023  | 4.1664106676 | -1.9507842369 |
| H | 5.1435392207  | 4.0013913391 | -2.4381204161 |
| H | 3.4926922997  | 4.6639708044 | -2.6373709515 |
| H | 4.312394599   | 4.7851233566 | -1.0590493928 |
| H | -0.0672296708 | 4.3548321871 | 0.1842494921  |
| O | -0.4513343168 | 4.9431894436 | 0.8567077163  |
| C | 0.3625794704  | 4.8416016281 | 2.0106675578  |
| H | -0.0729715198 | 5.4835727492 | 2.7843366733  |
| H | 0.4077126591  | 3.8173594371 | 2.4137580203  |
| H | 1.3952803034  | 5.1775792258 | 1.834583077   |

### 17c\_t2

|   |               |               |               |
|---|---------------|---------------|---------------|
| C | -0.012660545  | -0.4996300236 | 0.4519429254  |
| N | 1.3619307906  | -0.1780426252 | 0.2916875567  |
| N | -0.6369031749 | -1.5882826961 | 0.618043724   |
| N | -0.7051093781 | 0.7391331932  | 0.3940346286  |
| C | -2.1898110839 | 0.8328635628  | 0.3175996129  |
| C | 1.5306155445  | 1.1725250875  | 0.1505156163  |
| C | 0.1655797308  | 1.7895308549  | 0.2436572968  |
| C | -0.1017656012 | -2.9491384492 | 0.6508966358  |
| C | 0.0720507901  | 3.1484179353  | 0.1838141576  |
| C | 2.5478293302  | -1.0522912466 | 0.3606519056  |
| C | 3.0743646897  | -1.4630542011 | -0.9735412682 |
| H | 3.3259693458  | -0.4730764501 | 0.8610940166  |
| H | 2.3152299162  | -1.9072736435 | 0.9928878573  |
| H | 1.0120538891  | 3.6475752444  | -0.025815125  |
| C | -1.0440181073 | 4.0615342052  | 0.4277319433  |
| O | 2.6145124169  | 1.7334039743  | 0.0170256466  |
| O | -0.6714683629 | 5.3219056879  | 0.0944855339  |
| O | -2.1488154559 | 3.8147957115  | 0.8963126979  |
| C | -1.6534404162 | 6.3472205708  | 0.3259726803  |
| H | -1.1846613704 | 7.278812655   | 0.0084176049  |
| H | -2.5563035407 | 6.1606783638  | -0.2615545219 |
| H | -1.9182322255 | 6.4007506292  | 1.3852336939  |
| O | 2.3442562358  | -2.369757988  | -1.6983523339 |
| C | 3.0224030787  | -2.5953407064 | -2.8628860144 |
| C | 4.1655856862  | -1.8584425195 | -2.8944683018 |
| C | 4.1978446255  | -1.1184915636 | -1.6658385687 |
| H | 4.9553175634  | -0.4202244063 | -1.3385450807 |
| H | 4.8950490147  | -1.8389656514 | -3.6920123931 |
| H | 2.5652729067  | -3.2936482899 | -3.5480529213 |
| C | -1.0969886304 | -3.8614516643 | -0.07683539   |
| H | 0.8561571932  | -3.0335939698 | 0.1298016958  |
| C | 0.0828899417  | -3.3908649138 | 2.1098023561  |
| H | -2.3730714073 | 1.8962367001  | 0.1934131062  |
| C | -2.7522743672 | 0.1123117813  | -0.9124382835 |

|   |               |               |               |
|---|---------------|---------------|---------------|
| C | -2.8603946517 | 0.415467053   | 1.629502641   |
| H | 0.4167944576  | -4.4329807673 | 2.1493301227  |
| H | 0.8263145148  | -2.7739624693 | 2.6251320918  |
| H | -0.8630875962 | -3.3110457309 | 2.6566019469  |
| H | -0.7406888483 | -4.8970140534 | -0.067026724  |
| H | -2.0792305319 | -3.8280624021 | 0.4074325809  |
| H | -1.2176983311 | -3.5533387658 | -1.1204194053 |
| H | -3.9315845595 | 0.6343141783  | 1.5665463541  |
| H | -2.7355295824 | -0.6499577299 | 1.8300436939  |
| H | -2.4499716286 | 0.9843176223  | 2.4697032428  |
| H | -3.8115883492 | 0.3709612809  | -1.0137306406 |
| H | -2.2396639503 | 0.4377284074  | -1.823671981  |
| H | -2.6691249569 | -0.9725126943 | -0.8308557844 |
| H | 3.1484560924  | 3.5075737203  | -0.208385865  |
| O | 3.3505024321  | 4.4602422828  | -0.2064100245 |
| C | 3.6954534267  | 4.8016912231  | 1.12872352    |
| H | 3.8892339615  | 5.8787999114  | 1.1589243465  |
| H | 2.8883175565  | 4.5840896874  | 1.8438662748  |
| H | 4.6042845217  | 4.2857050971  | 1.4739429195  |

#### E-17c\_t2

|   |               |               |               |
|---|---------------|---------------|---------------|
| C | 0.856592133   | -1.1624657596 | 0.3016186279  |
| N | 0.5317985256  | 0.2091056559  | 0.4250874776  |
| N | 1.9374126069  | -1.8189662503 | 0.3815468688  |
| N | -0.3733621518 | -1.8166180969 | 0.0439322066  |
| C | -0.4197394081 | -3.2884901003 | -0.1257246962 |
| C | -0.8170323599 | 0.4224144466  | 0.2442782346  |
| C | -1.4287882974 | -0.9301817457 | 0.0163601188  |
| C | 3.2976475226  | -1.3399885664 | 0.6178358097  |
| C | -2.7309900842 | -1.2257741652 | -0.2420942839 |
| C | 1.4266958533  | 1.3460290764  | 0.703827303   |
| C | 1.9102333167  | 2.0566977143  | -0.5170513273 |
| H | 0.8531600674  | 2.0634091279  | 1.293593081   |
| H | 2.2462918554  | 0.9927053997  | 1.3279203102  |
| H | -2.9796732156 | -2.2363427776 | -0.5341397503 |
| C | -3.8962914483 | -0.3336583406 | -0.1546160108 |
| O | -1.3634943373 | 1.5167056523  | 0.2438462514  |
| O | -4.8954947966 | -0.8478894547 | -0.9247631382 |
| O | -4.0415394399 | 0.672176913   | 0.5161473877  |
| C | -6.1379478583 | -0.1263595316 | -0.8896138036 |
| H | -6.818302432  | -0.6781042691 | -1.5391345627 |
| H | -6.538133972  | -0.0870261466 | 0.1272735369  |
| H | -6.0081636936 | 0.8933574327  | -1.2623610418 |
| O | 2.7584762284  | 1.3839097806  | -1.3592587766 |
| C | 3.0733961125  | 2.2374010328  | -2.379273181  |
| C | 2.4513567616  | 3.4343776288  | -2.2031331147 |
| C | 1.6910035061  | 3.3167026709  | -0.9918247496 |
| H | 1.0598301661  | 4.0615728889  | -0.5272979273 |
| H | 2.5198406228  | 4.2945722807  | -2.8543569432 |
| H | 3.7371738936  | 1.8450812859  | -3.1352695654 |

|   |               |               |               |
|---|---------------|---------------|---------------|
| C | 4.2455116221  | -2.204193766  | -0.2226193044 |
| H | 3.4348028949  | -0.3025305916 | 0.2990493661  |
| C | 3.6302998982  | -1.4501289792 | 2.1127427435  |
| H | 0.6171305954  | -3.5826193535 | 0.0386250516  |
| C | -0.7923386889 | -3.6943136036 | -1.5568755165 |
| C | -1.2703764725 | -3.9708408946 | 0.9517831178  |
| H | 4.6727447506  | -1.1659417743 | 2.2909483369  |
| H | 2.9904809891  | -0.7965968389 | 2.7147584007  |
| H | 3.488803382   | -2.4793121089 | 2.4607659352  |
| H | 5.2831546071  | -1.8847389839 | -0.0790752999 |
| H | 4.1636462077  | -3.2587833962 | 0.0634194749  |
| H | 4.0061029395  | -2.1197990111 | -1.287679076  |
| H | -1.131406791  | -5.0538585374 | 0.8750831219  |
| H | -0.9522068978 | -3.6587032476 | 1.951342924   |
| H | -2.3389695515 | -3.7664798768 | 0.850292767   |
| H | -0.6585278704 | -4.7754879894 | -1.6642335822 |
| H | -1.8294092024 | -3.4626782248 | -1.8132678809 |
| H | -0.1392429715 | -3.1986122246 | -2.2816351311 |
| H | -0.9403219744 | 3.2314530188  | 0.83684576    |
| O | -0.629379861  | 4.053297987   | 1.2571076961  |
| C | -1.5127873125 | 4.3501128274  | 2.3301518226  |
| H | -1.1302446196 | 5.2389634507  | 2.8417019676  |
| H | -2.5334038404 | 4.5710216259  | 1.9838054099  |
| H | -1.5711555096 | 3.53413371    | 3.0650955534  |

# 18c\_t1

|   |               |               |               |
|---|---------------|---------------|---------------|
| C | -0.2805396825 | -0.8482218178 | 0.4628062791  |
| N | 1.0882546033  | -0.581453823  | 0.1514944127  |
| N | -0.8181464932 | -1.9295343683 | 0.8469576902  |
| N | -1.1548928708 | 0.2856376172  | 0.3204039468  |
| C | -2.6300222258 | 0.0420454023  | 0.4495143525  |
| C | 1.5210753999  | 0.7046477502  | -0.1216176423 |
| C | -0.7193926779 | 1.5871679483  | 0.1586001534  |
| C | -0.4216539843 | -3.3197089381 | 1.011408129   |
| O | -1.5090934977 | 2.5488849746  | 0.1972520118  |
| C | 2.0960847162  | -1.6187038025 | 0.4324516691  |
| C | 2.2961623758  | -2.5846190972 | -0.6964147258 |
| H | 3.0383932988  | -1.1235117324 | 0.6748031357  |
| H | 1.8064074842  | -2.146286568  | 1.3424830387  |
| C | 0.6907349045  | 1.7686355869  | -0.0961809342 |
| O | 3.0428959519  | -3.6867647703 | -0.377873284  |
| C | 3.1380277184  | -4.4504820352 | -1.510732979  |
| C | 2.4655129753  | -3.8581294214 | -2.5326571529 |
| C | 1.9169336168  | -2.6398206538 | -2.0040131454 |
| H | 1.3326326303  | -1.9016036401 | -2.5333764944 |
| H | 2.3686214581  | -4.2342439961 | -3.5416114034 |
| H | 3.7062571839  | -5.3638024007 | -1.4175466252 |
| C | -1.4602799402 | -4.1932897043 | 0.2927266046  |
| H | 0.5502834569  | -3.5595806365 | 0.5740012519  |
| C | -0.3728265545 | -3.649665457  | 2.5100950472  |

|   |               |               |               |
|---|---------------|---------------|---------------|
| H | -2.7043182756 | -1.0416683662 | 0.4645366686  |
| C | -3.4043300095 | 0.5470290491  | -0.7725156351 |
| C | -3.1764388916 | 0.5624327048  | 1.7823333578  |
| H | -0.1438363699 | -4.7102014317 | 2.6587140605  |
| H | 0.3936185568  | -3.0589017499 | 3.022918233   |
| H | -1.3384521504 | -3.4340432073 | 2.9808352638  |
| H | -1.2038789761 | -5.2530488344 | 0.3989394354  |
| H | -2.4600736342 | -4.0347600893 | 0.7118372726  |
| H | -1.4938848982 | -3.956058942  | -0.7756305108 |
| H | -4.2261653616 | 0.2652939204  | 1.880600343   |
| H | -2.6258224121 | 0.1280904458  | 2.6230443409  |
| H | -3.1178999433 | 1.6505614617  | 1.8470113251  |
| H | -4.4282902952 | 0.1621502008  | -0.715773561  |
| H | -3.4454477754 | 1.6354876835  | -0.822166903  |
| H | -2.9577121856 | 0.1691173931  | -1.6983743665 |
| H | 1.0392285957  | 2.7697669963  | -0.3071277224 |
| C | 2.9411812829  | 0.9270289569  | -0.5816033748 |
| O | 3.4542947496  | 2.0278069123  | -0.0249792282 |
| O | 3.5123623564  | 0.2285634244  | -1.3940245397 |
| C | 4.7721052165  | 2.4114759108  | -0.4877656346 |
| H | 5.0222515442  | 3.3114711215  | 0.0720665888  |
| H | 5.4923183969  | 1.6178517698  | -0.278711851  |
| H | 4.7513958306  | 2.6205470352  | -1.5594986967 |
| H | -0.7351075865 | 4.1588199402  | -0.1127002513 |
| O | -0.1793178256 | 4.9620793933  | -0.1931844116 |
| C | -0.0056882642 | 5.4693121562  | 1.1197942695  |
| H | 0.6456973811  | 6.3478605225  | 1.0600103249  |
| H | -0.9544703493 | 5.786961506   | 1.5799742845  |
| H | 0.4707294461  | 4.7445666994  | 1.7978455822  |

# 18c\_t2

|   |               |               |               |
|---|---------------|---------------|---------------|
| C | -0.0574174078 | -1.0076193018 | 0.5413978383  |
| N | 1.342277713   | -1.07902995   | 0.3011153057  |
| N | -0.8786290988 | -1.9446914121 | 0.7916538911  |
| N | -0.6021702498 | 0.3224675801  | 0.5084474655  |
| C | -2.1032353241 | 0.4227491949  | 0.5927710746  |
| C | 2.1421344045  | 0.0056509987  | -0.0835875969 |
| C | 0.1958533343  | 1.4013399238  | 0.2477082779  |
| C | -0.79007339   | -3.3980208663 | 0.7232502096  |
| C | -0.2943457848 | 2.8079607044  | 0.5044026862  |
| C | 2.0968828221  | -2.3052301938 | 0.5966059585  |
| C | 2.3756875447  | -3.1414170166 | -0.6167195329 |
| H | 3.0483907014  | -1.9944867491 | 1.0352432141  |
| H | 1.5642737045  | -2.8727626769 | 1.3582972522  |
| C | 1.5038972483  | 1.2883580452  | -0.1040730386 |
| O | 3.1779538495  | -4.2262584124 | -0.3927393306 |
| C | 3.3425127632  | -4.8630523487 | -1.5941770514 |
| C | 2.664193133   | -4.2043282688 | -2.5701675548 |
| C | 2.0326532252  | -3.0798460713 | -1.9348388235 |
| H | 1.4147954524  | -2.3274017092 | -2.4034272003 |



|   |               |               |               |
|---|---------------|---------------|---------------|
| H | 2.6146730259  | -4.4769188006 | -3.6152079096 |
| H | 3.9570360612  | -5.7506800886 | -1.5774136183 |
| C | -1.9840618414 | -3.8980988638 | -0.1039034804 |
| H | 0.11402951    | -3.7543432904 | 0.220224619   |
| C | -0.8354820082 | -3.9817990575 | 2.142473898   |
| H | -2.4217154719 | -0.5623087707 | 0.2589260216  |
| C | -2.7081843644 | 1.4430920494  | -0.3768892028 |
| C | -2.5797695898 | 0.5940609316  | 2.0369836383  |
| H | -0.8294984636 | -5.0762112133 | 2.1052786621  |
| H | 0.0207125463  | -3.6560890226 | 2.7425724599  |
| H | -1.7476230657 | -3.6586310702 | 2.6566413088  |
| H | -1.9639920196 | -4.9908754416 | -0.1790281634 |
| H | -2.930663739  | -3.5999822127 | 0.3603730569  |
| H | -1.954822153  | -3.4861133799 | -1.1179582514 |
| H | -3.67442975   | 0.5629488561  | 2.0607071519  |
| H | -2.2065512953 | -0.2207937977 | 2.6634448717  |
| H | -2.2489582823 | 1.5457036986  | 2.4575013856  |
| H | -3.7692932483 | 1.199062924   | -0.4883246068 |
| H | -2.6606203689 | 2.474927323   | -0.022898406  |
| H | -2.2492268992 | 1.3805959288  | -1.3683101641 |
| H | 2.117168409   | 2.1540161966  | -0.3115357086 |
| O | 3.3481040431  | -0.171844425  | -0.3211278706 |
| O | -0.072651054  | 3.5937584543  | -0.5506987738 |
| O | -0.7399865186 | 3.1803662776  | 1.5708218421  |
| C | -0.3713493875 | 4.9998342509  | -0.3671126843 |
| H | -0.1268523741 | 5.471392525   | -1.3177660606 |
| H | -1.4294776989 | 5.1356086615  | -0.1340984171 |
| H | 0.2415687667  | 5.4153827982  | 0.4354476288  |
| H | 4.2499273382  | 1.3849295162  | -0.6497345999 |
| O | 4.6172051736  | 2.2913620801  | -0.6933807027 |
| C | 5.2236032969  | 2.5456901298  | 0.5635905851  |
| H | 5.6075353416  | 3.5713667195  | 0.5520708528  |
| H | 4.5165540844  | 2.4618188147  | 1.4031459882  |
| H | 6.0711373557  | 1.873151829   | 0.768639605   |

## S8. References

1. Ribeiro, R.F.; Marenich, A.V.; Cramer, C.J. Truhlar, D.G., Use of Solution-Phase Vibrational Frequencies in Continuum Models for the Free Energy of Solvation, *J. Phys. Chem. B*, **2011**, *115*, 14556–14562. DOI: 10.1021/jp205508z
2. Molteni, G.; Ponti, A. The Azide-Allene Dipolar Cycloaddition: Is DFT Able to Predict Site- and Regio-Selectivity? *Molecules* **2021**, *26*, 928. DOI: 10.3390/molecules26040928
3. Yepes, D.; Valenzuela, J.; Martínez-Araya, J.I.; Pérez, P.; Jaque, P. Effect of Exchange-Correlation Functional on the Synchronicity/Nonsynchronicity in Bond Formation in Diels-Alder Reactions: A Reaction Force Constant Analysis, *Phys. Chem. Chem. Phys.* **2019**, *21*, 7412-7428, DOI: 10.1039/C8CP02284D.
